# Supplementary material for: Estimating human mobility in Holocene Western Eurasia with large-scale ancient genomic data
Source: PubMed Central journal article supplement (PMC9992830; doi:10.1073/pnas.2218375120), 2023-02-23
Supplement: pnas.2218375120.sapp.pdf [file pnas.2218375120.sapp.pdf]

1  
2  
3  
4  
5  
6

Supplementary Material  
for  
*Estimating human mobility in Holocene Western Eurasia  
with large-scale ancient genomic data*

Clemens Schmid & Stephan Schiffels

2023

7 **Contents**

8 **A Supplementary Figures** **1**

9 **B Meta information for the Datasets S1, S2 and S3** **18**

10 **1 Supplementary Text: Creating a simplified genetic space** **20**

11 1.1 Finding the most suitable multivariate analysis method . . . . . 20

12 **2 Supplementary Text: Interpolation parameter estimation** **25**

13 2.1 Variogram analysis . . . . . 26

14 2.2 Maximum likelihood estimation . . . . . 29

15 2.3 Crossvalidation . . . . . 32

16 **3 Supplementary Text: The similarity search algorithm** **35**

17 3.1 Ancestry and sample-wise similarity fields . . . . . 35

18 3.2 Diachronic mobility proxy . . . . . 37

19 3.3 Concrete steps for the mobility estimation . . . . . 37

20 **4 Supplementary Text: A toy simulation to demonstrate the similarity search algorithm** **39**

21 4.1 Simulation setup . . . . . 40

22 4.2 Interpolation . . . . . 42

23 4.3 Similarity search . . . . . 42

24 4.4 Conclusion . . . . . 44

25 **5 Supplementary Text: Mobility curve exploration** **46**

26 5.1 Two additional regions: Southeastern Europe and Western Pontic Steppe . . . . . 46

27 5.2 Comparing different mobility curves . . . . . 47

28 **C Bibliography: Supplementary Texts** **50**

29 **D Bibliography: AADR Dataset** **52**

30 **A Supplementary Figures**

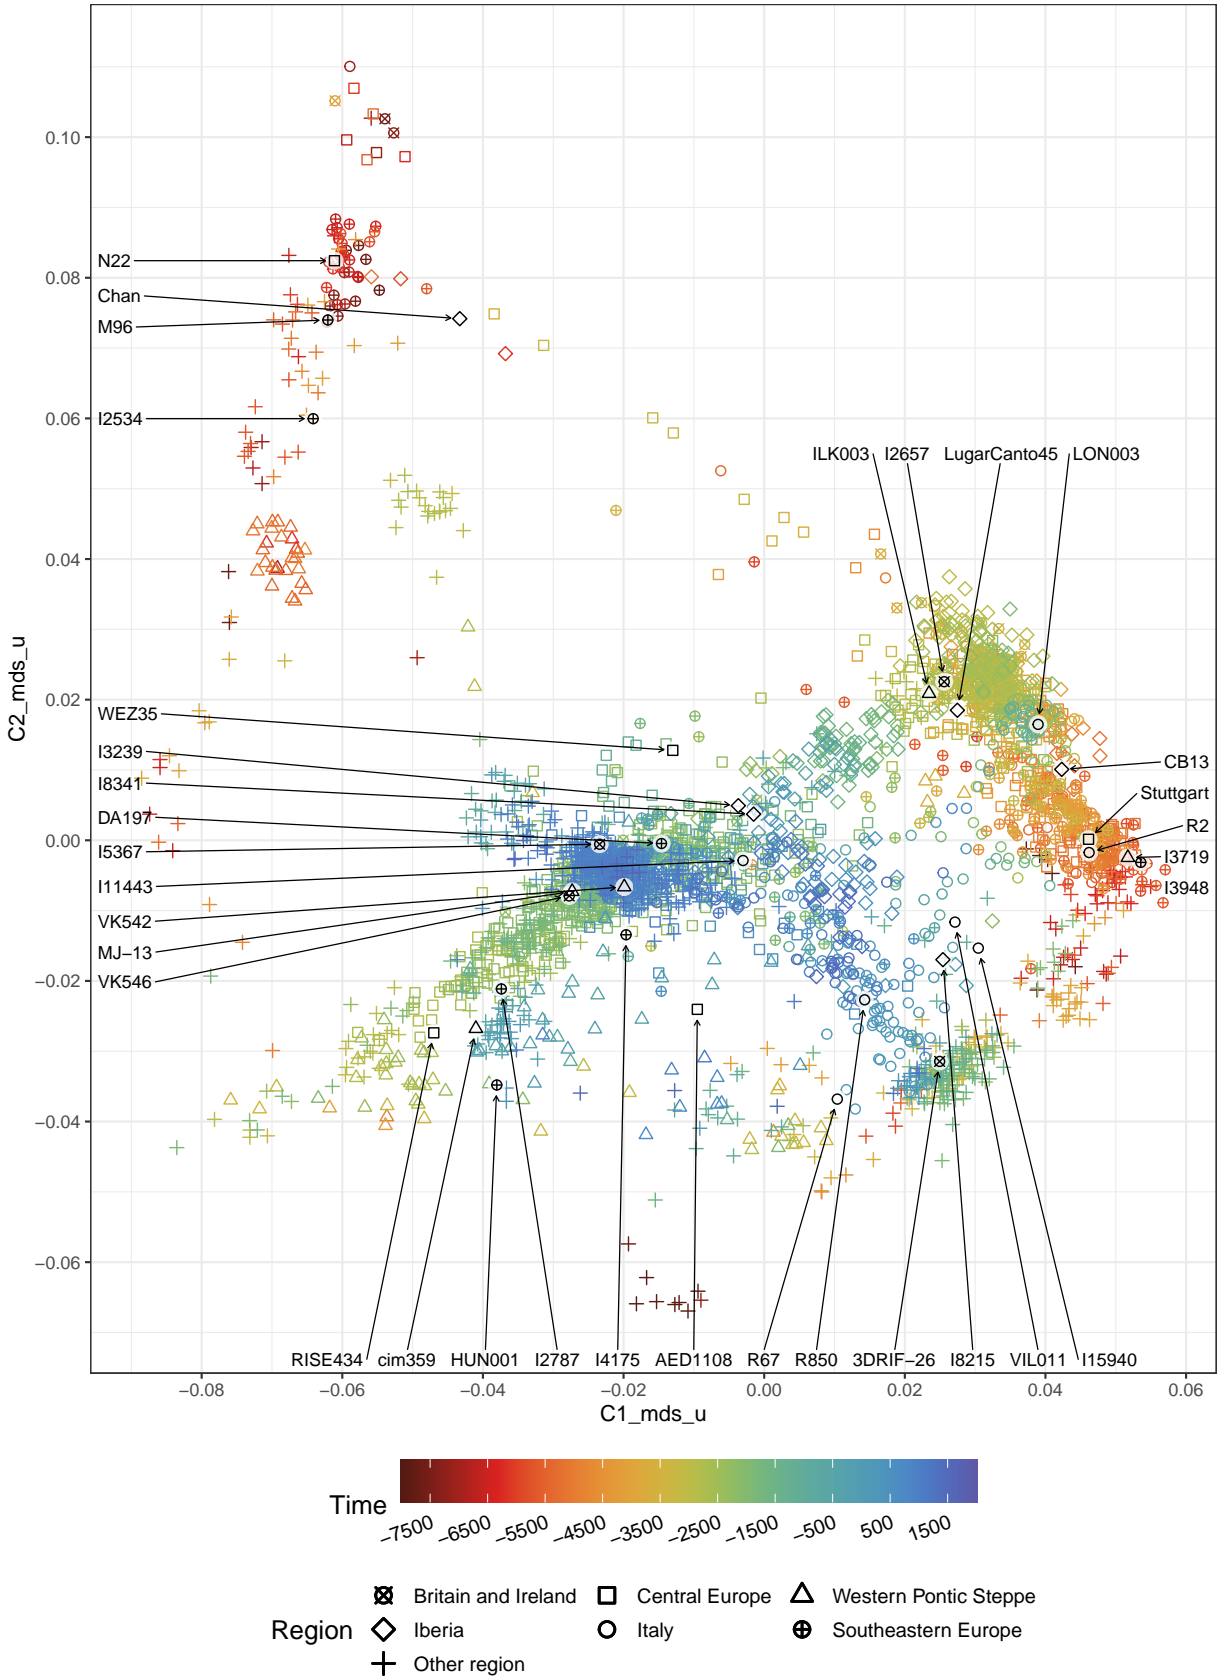

**Figure S1:** A more detailed version of Figure 2, where the individuals mentioned in the text are highlighted.

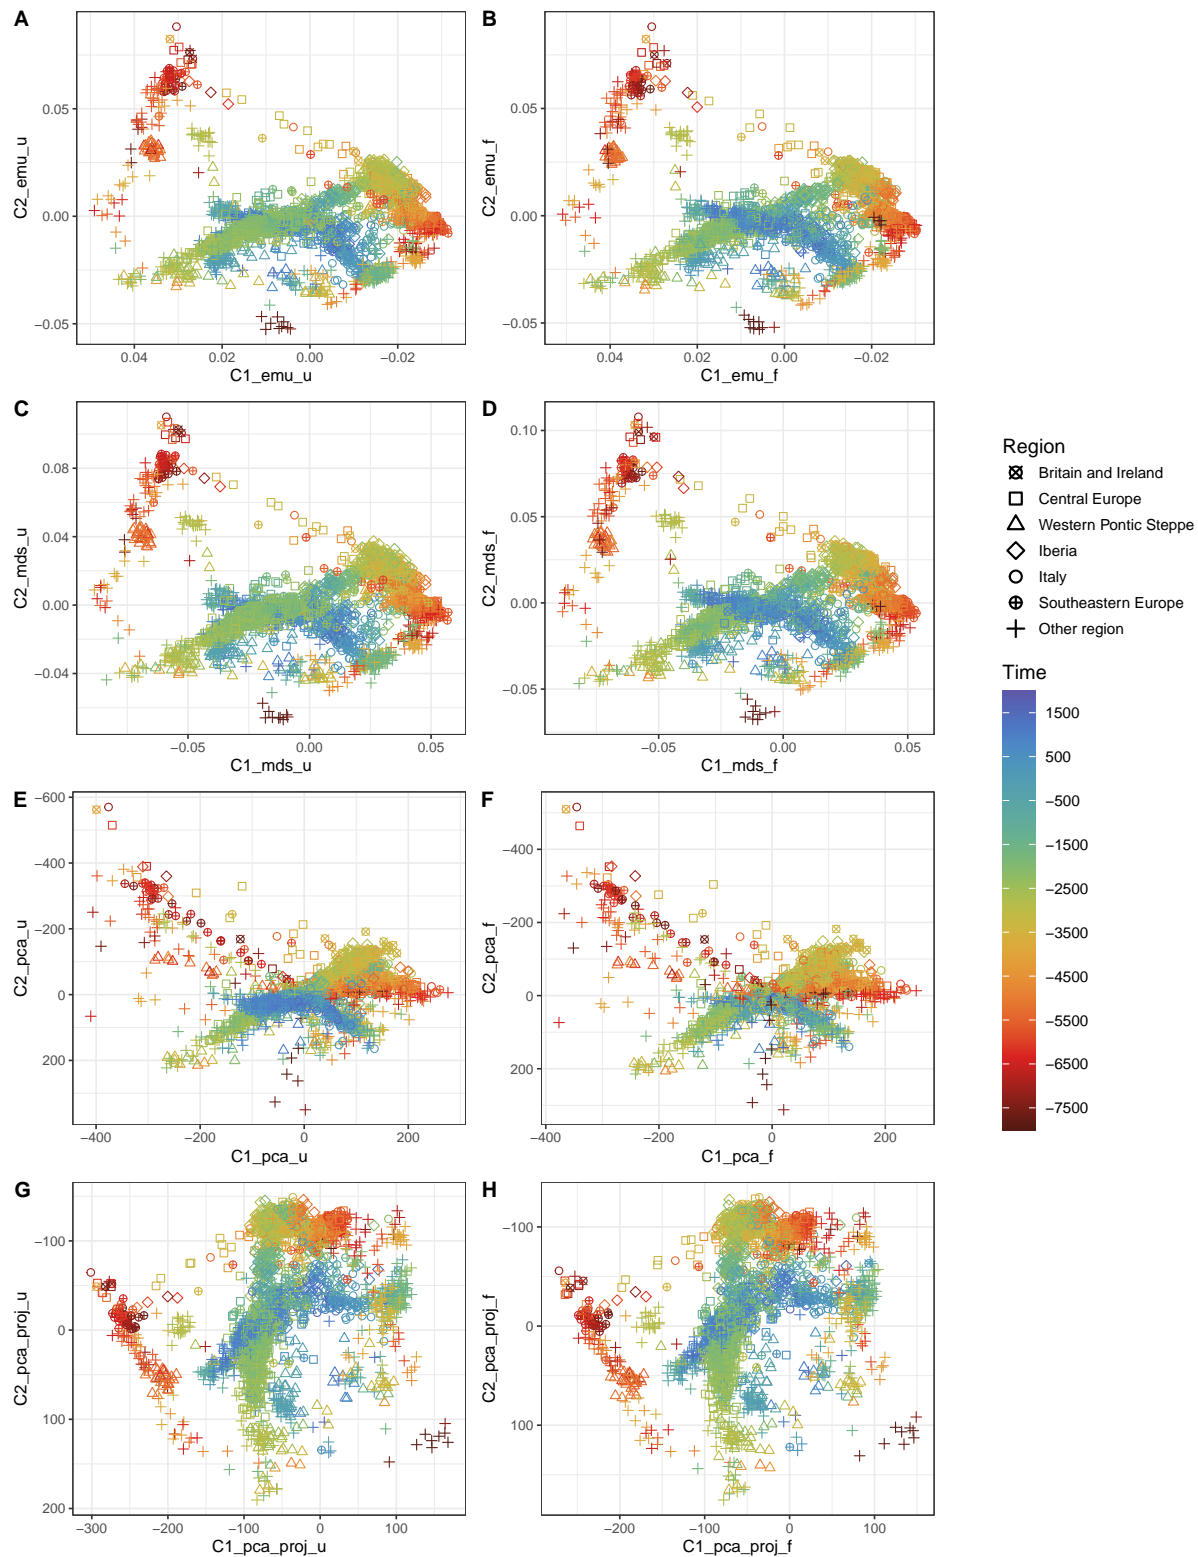

**Figure S2:** Scatter plots of samples on the first two result dimensions of the four multivariate analysis methods run for this paper (rows of the plot matrix), each in two iterations for the two tested SNP sets (columns of the plot matrix). Shape and colour according to Figure 1.



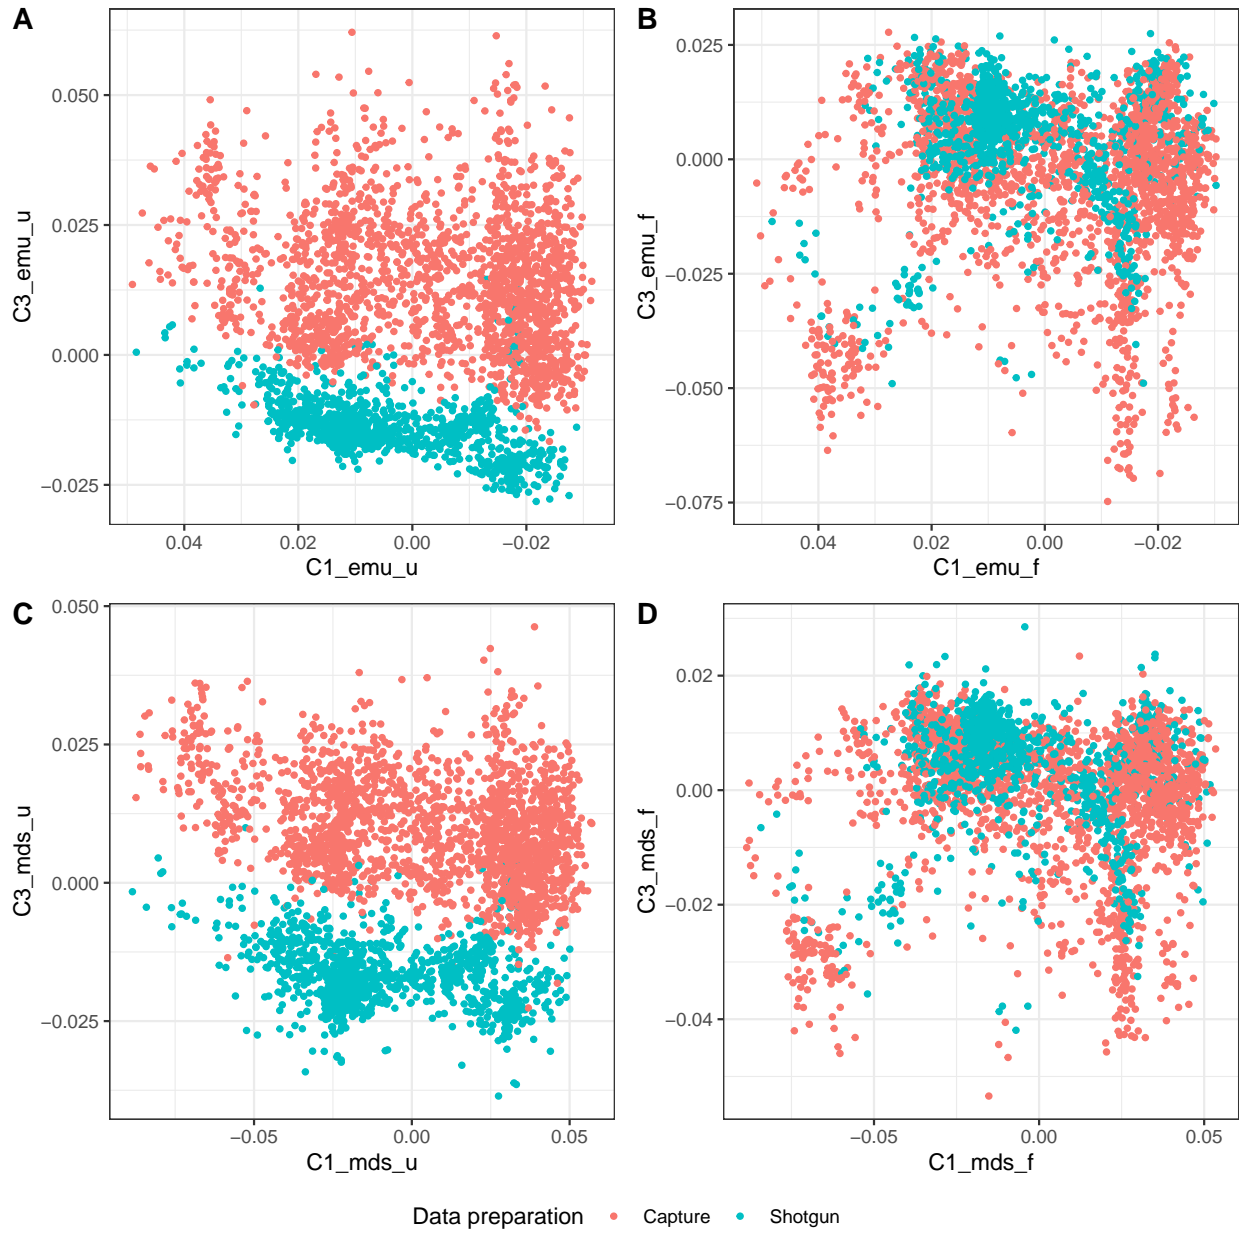

**Figure S3:** Scatterplots of samples on output dimension one and three for EMU and MDS. Both in two iterations for the two tested SNP sets: **A** and **C** with the unfiltered set, **B** and **D** for the filtered one. Samples handled with capture and shotgun technique are distinguished via dot colour.

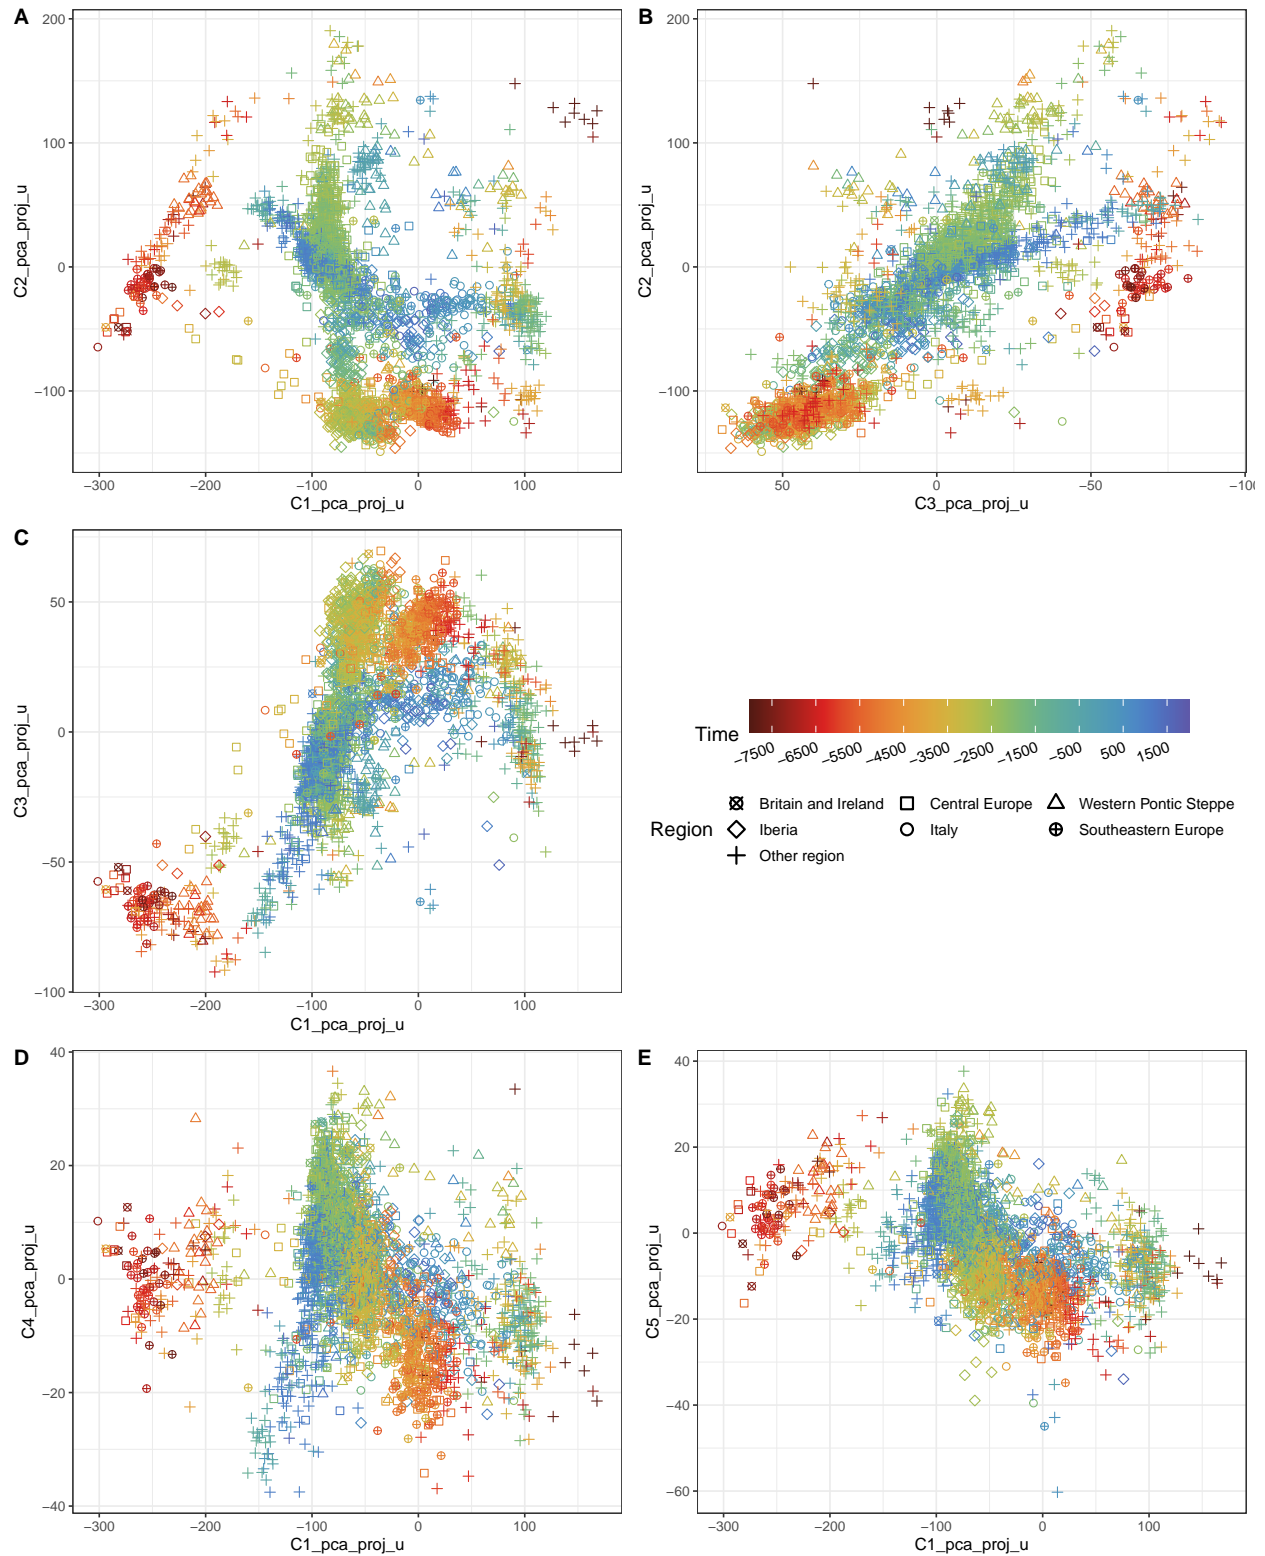

**Figure S4:** Scatter plots with the (ancient) sample distribution on the first five output dimensions of projected PCA. The modern reference samples used for the projection are left out for the sake of visual clarity. For **A**, **B** and **C**: To stay true to a 3D perspective, the printing order of each sample dot is according to the third dimension (the one not on the two axis) – with lower values always printed first. For **A** that means for example that the dots are printed in the order of their coordinate value on C3: Samples with lower values on C3 are printed first, so they are below samples with higher C3 values. **D** and **E** are ordered by C1.

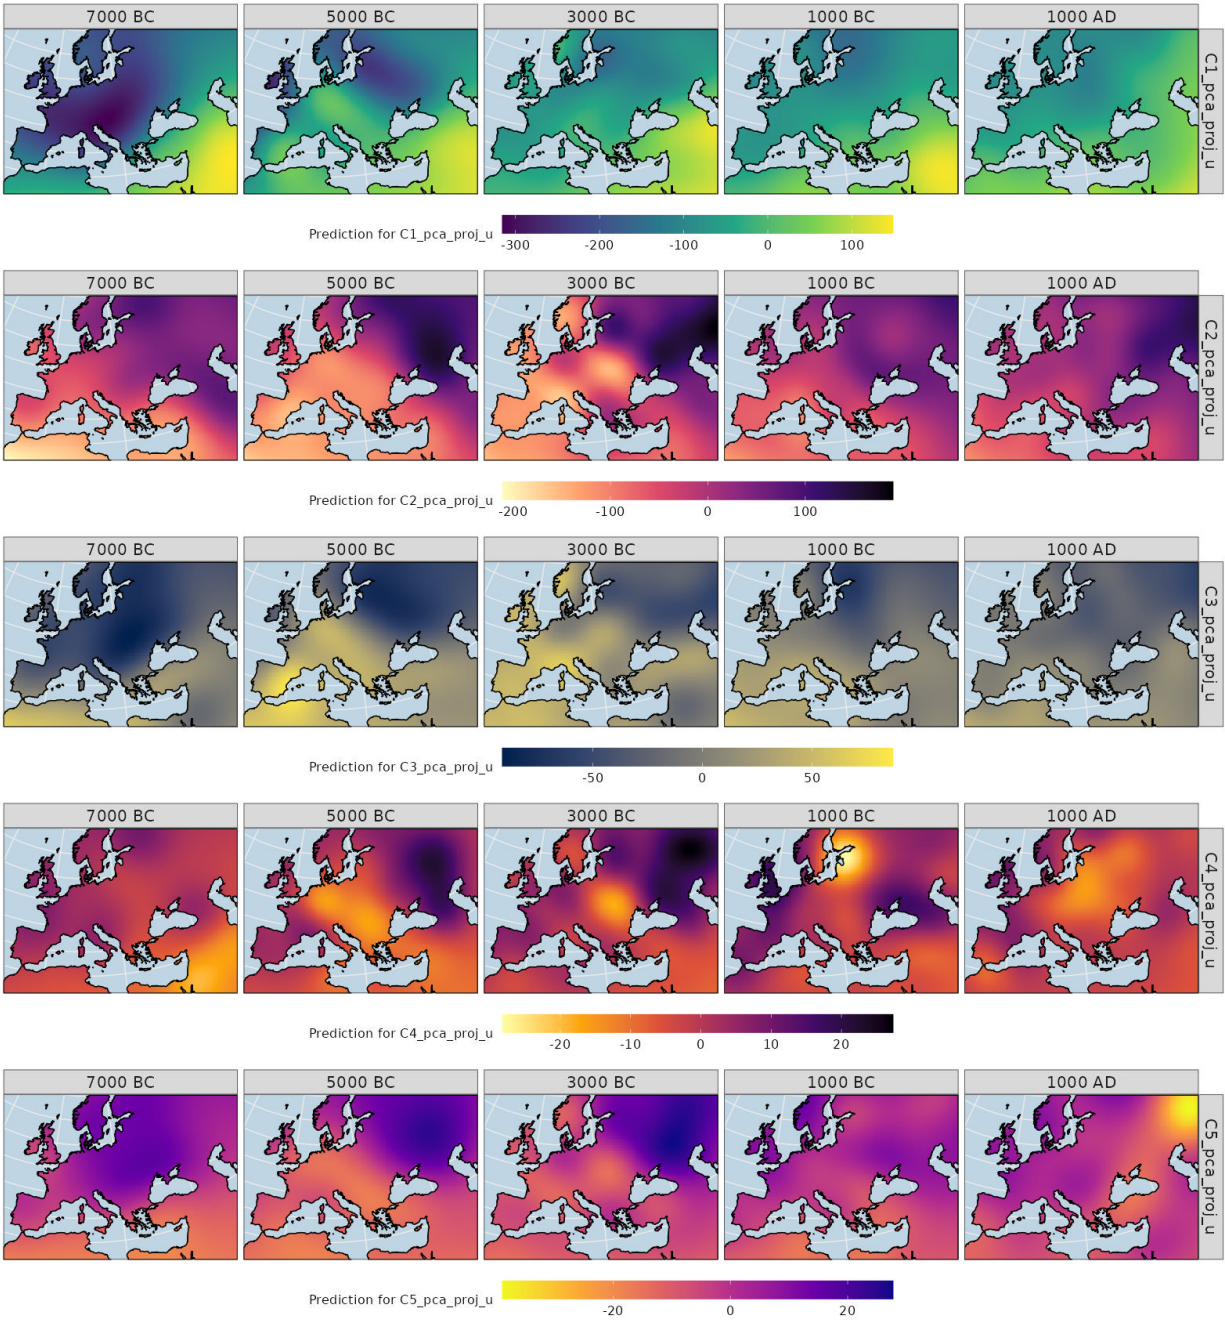

**Figure S5:** Diachronic Gaussian process regression interpolation map matrix as in Figure 3, but here for the first five output dimensions of the projected PCA. Compare Figure S4.

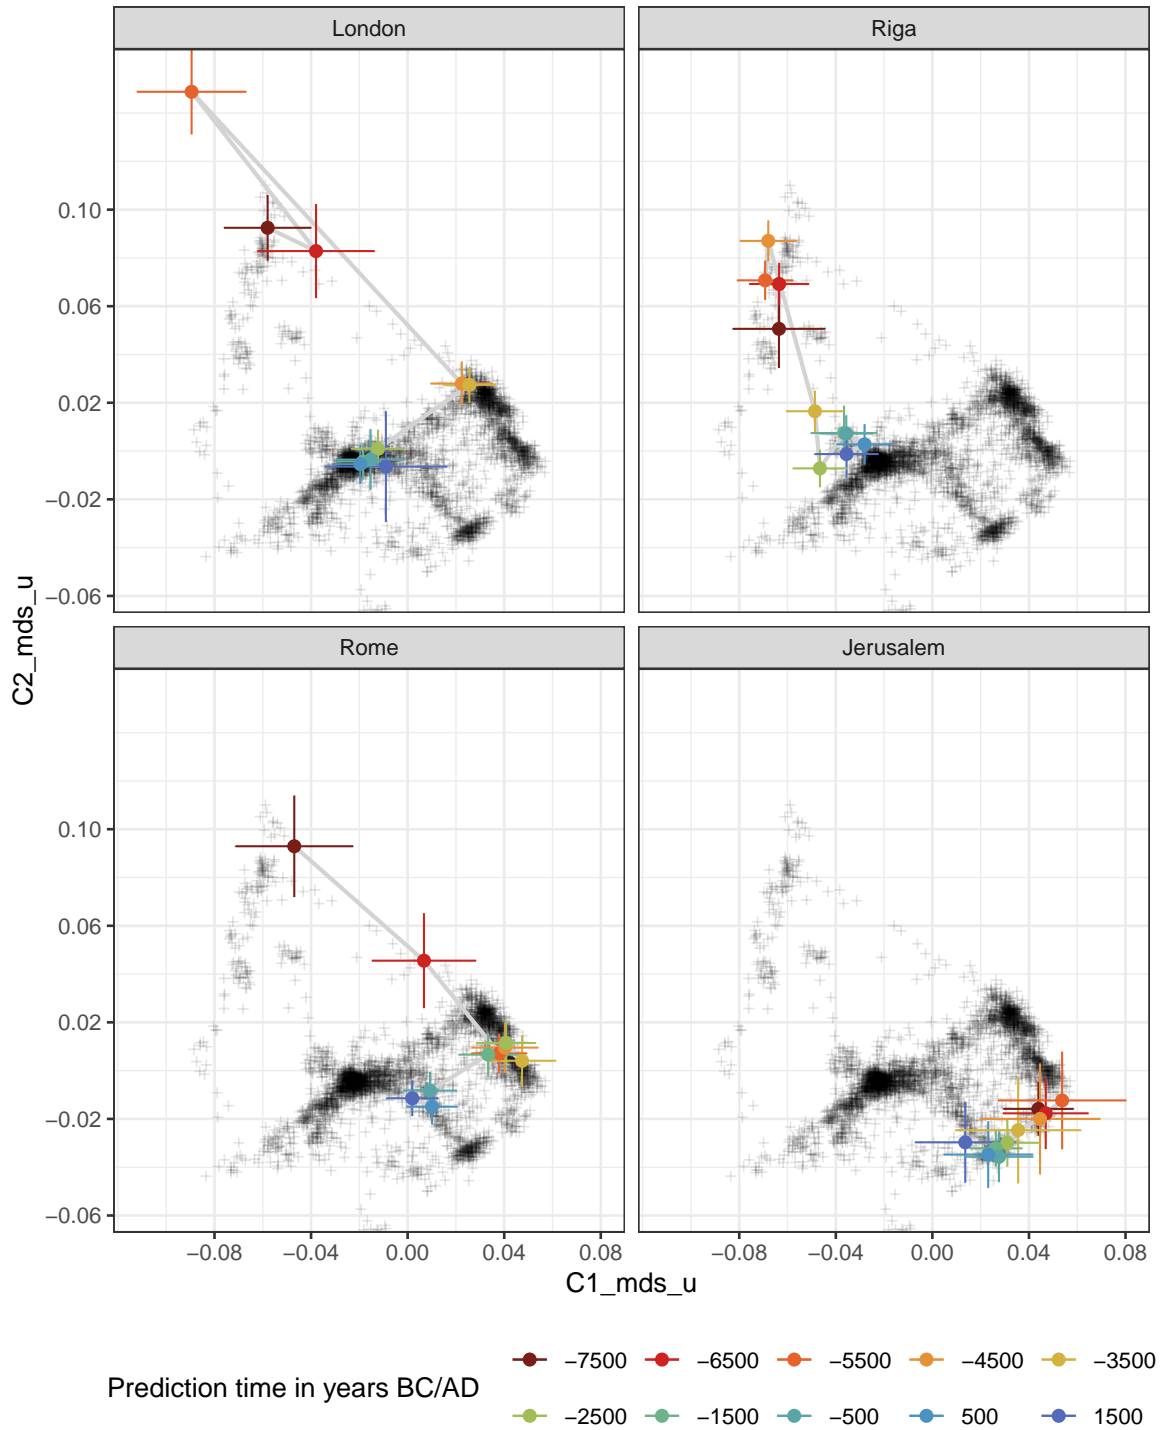

**Figure S6:** Interpolation-based reconstruction of the past ancestry development at the spatial position of modern day city centres. Each "time-path" in MDS space (see Figure 3) connects the interpolated positions in steps of 1000 years. The individual steps are colour-coded by age and horizontal and vertical error bars indicate the standard deviations given by the GPR model for this position. The black, semitransparent crosses in the background are the ancient samples as in Figure 2.



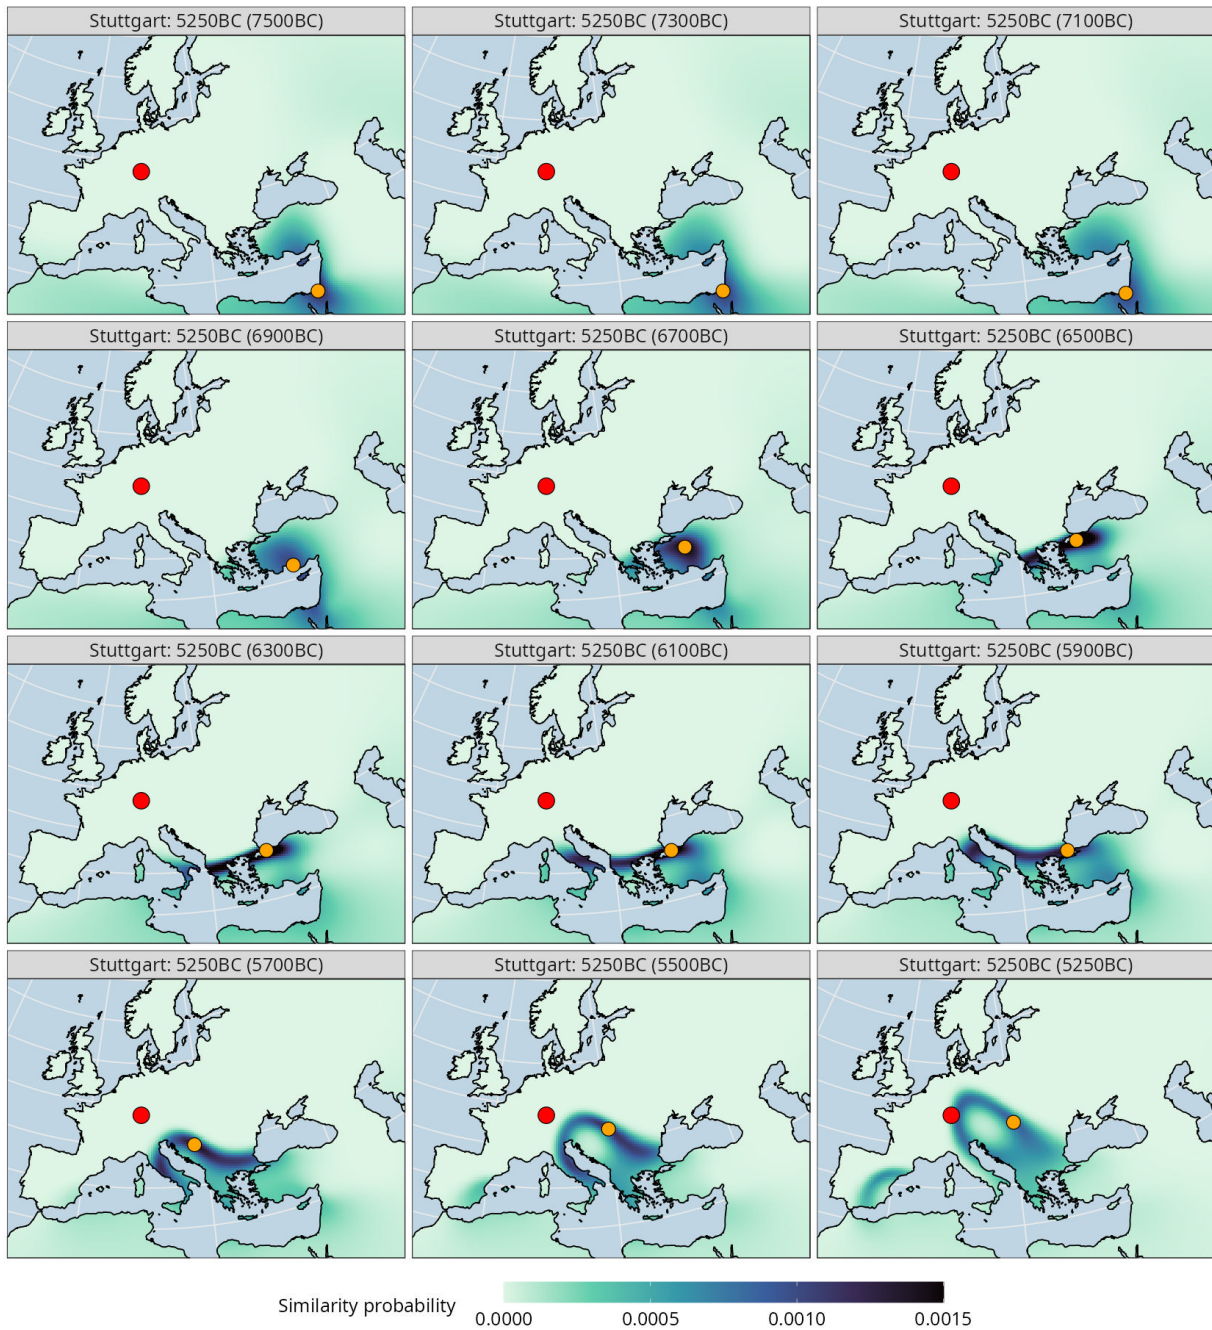

**Figure S7:** Plot matrix similar to Figure 4, but here just the Stuttgart sample with different retrospection distances through time. The absolute date of a timeslice is given in parentheses.



**PCA C1**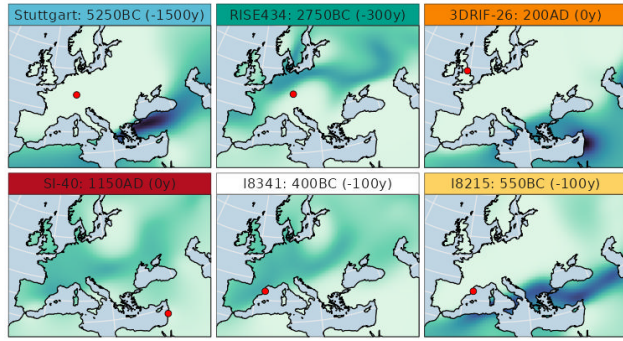**PCA C2**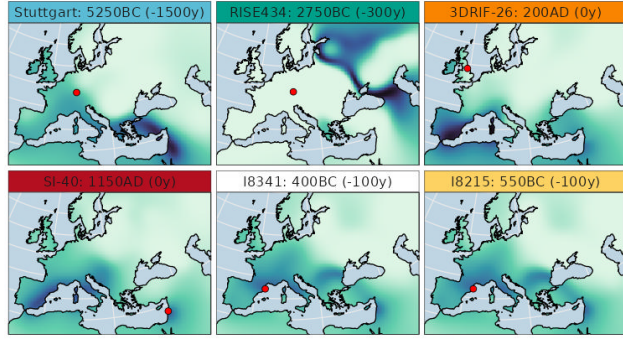**PCA C3**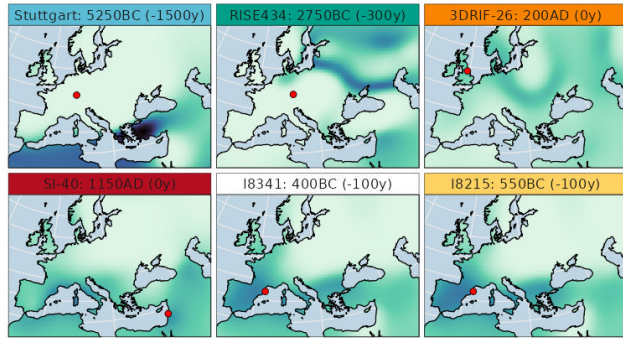**PCA C4**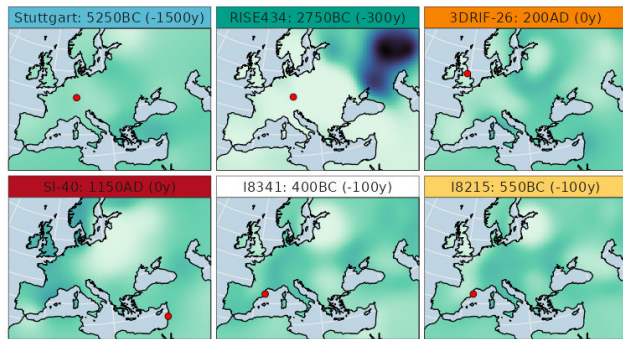**PCA C5**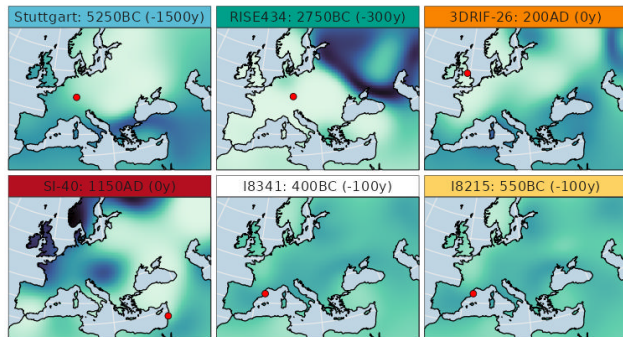**PCA C1\*C2**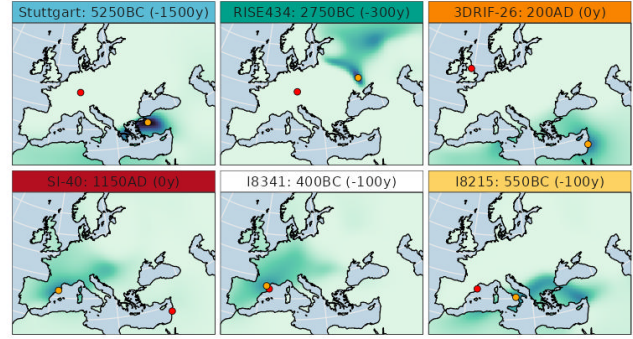**PCA C1\*C2\*C3**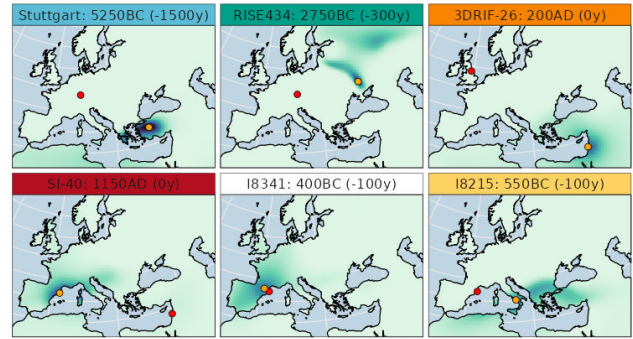**PCA C1\*C2\*C3\*C4**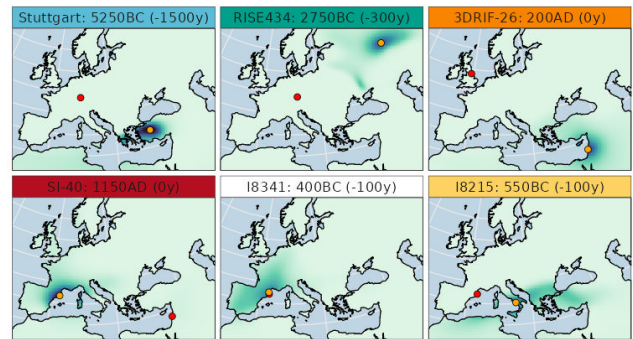**PCA C1\*C2\*C3\*C4\*C5**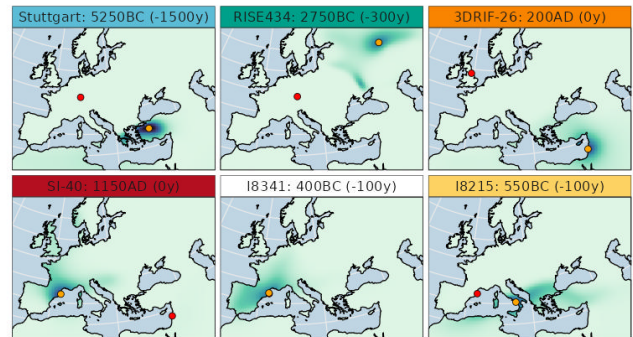

**Figure S8:** Plot matrix similar to Figure 4, but here not just for the product of two similarity search dimensions (MDS C1\*C2), but for the individual projected PCA dimensions (PCA C1-C10, on the left), and their cumulative products (on the right). To simplify the comparison, colours were assigned to the facet labels. These feature the sample ID, an approximate age and the retrospection distance applied.



**PCA C6**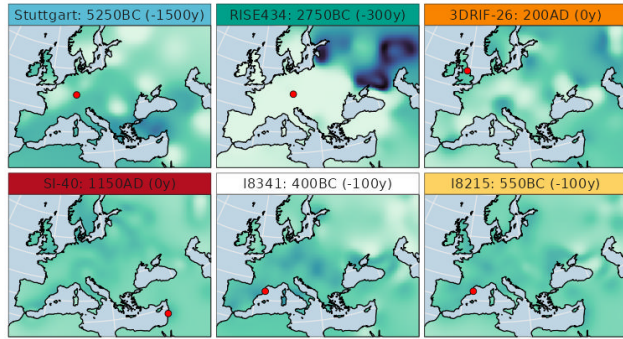**PCA C1\*C2\*C3\*C4\*C5\*C6**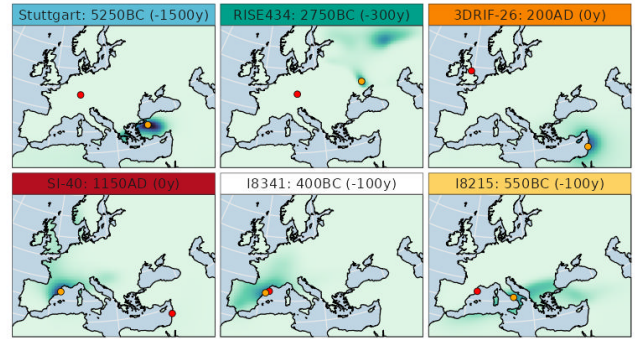**PCA C7**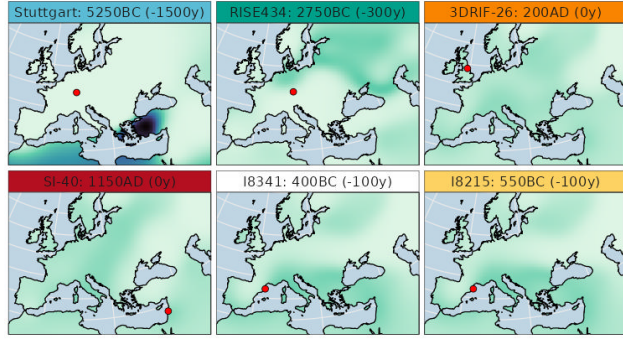**PCA C1\*C2\*C3\*C4\*C5\*C6\*C7**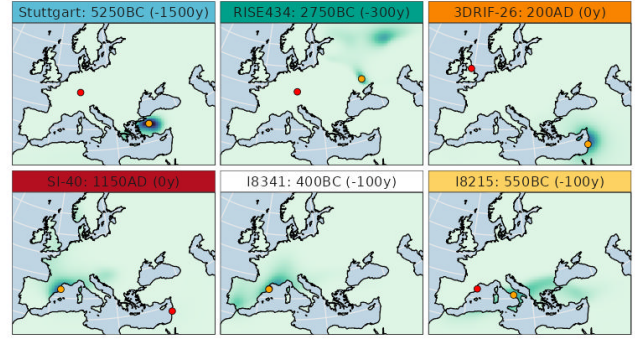**PCA C8**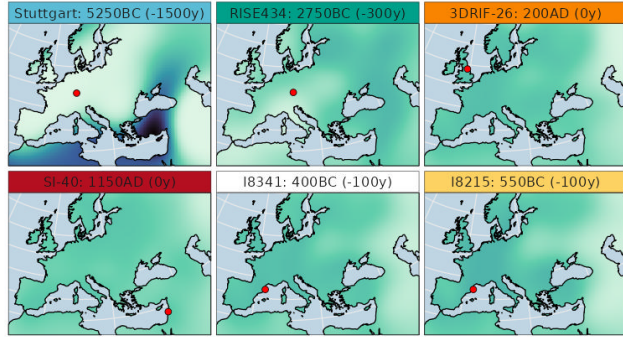**PCA C1\*C2\*C3\*C4\*C5\*C6\*C7\*C8**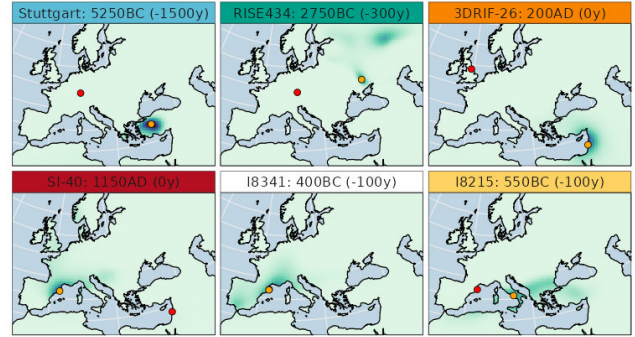**PCA C9**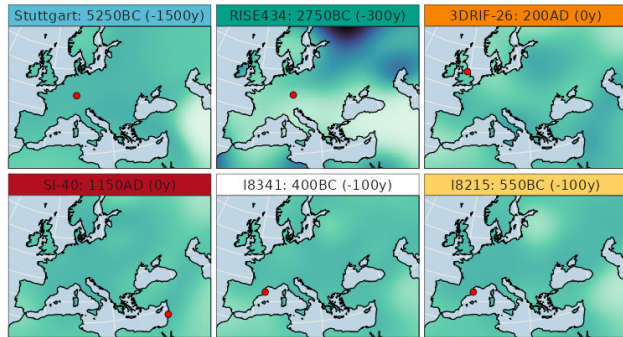**PCA C1\*C2\*C3\*C4\*C5\*C6\*C7\*C8\*C9**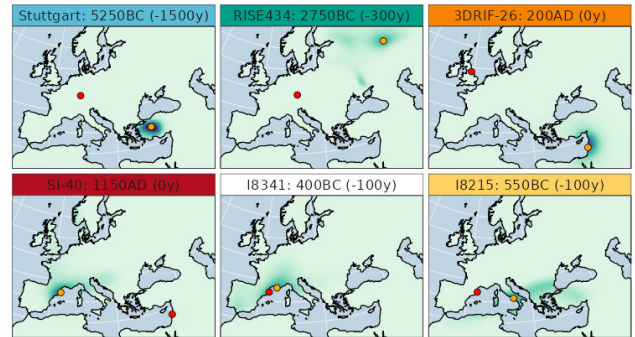**PCA C10**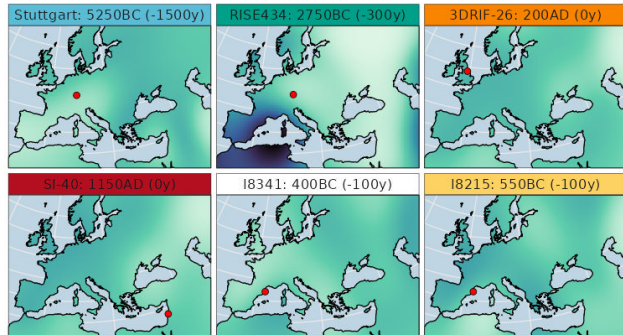**PCA C1\*C2\*C3\*C4\*C5\*C6\*C7\*C8\*C9\*C10**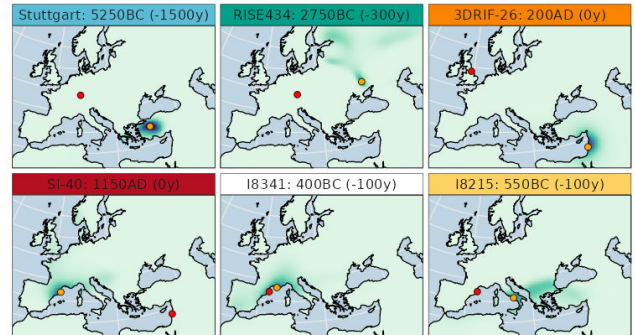

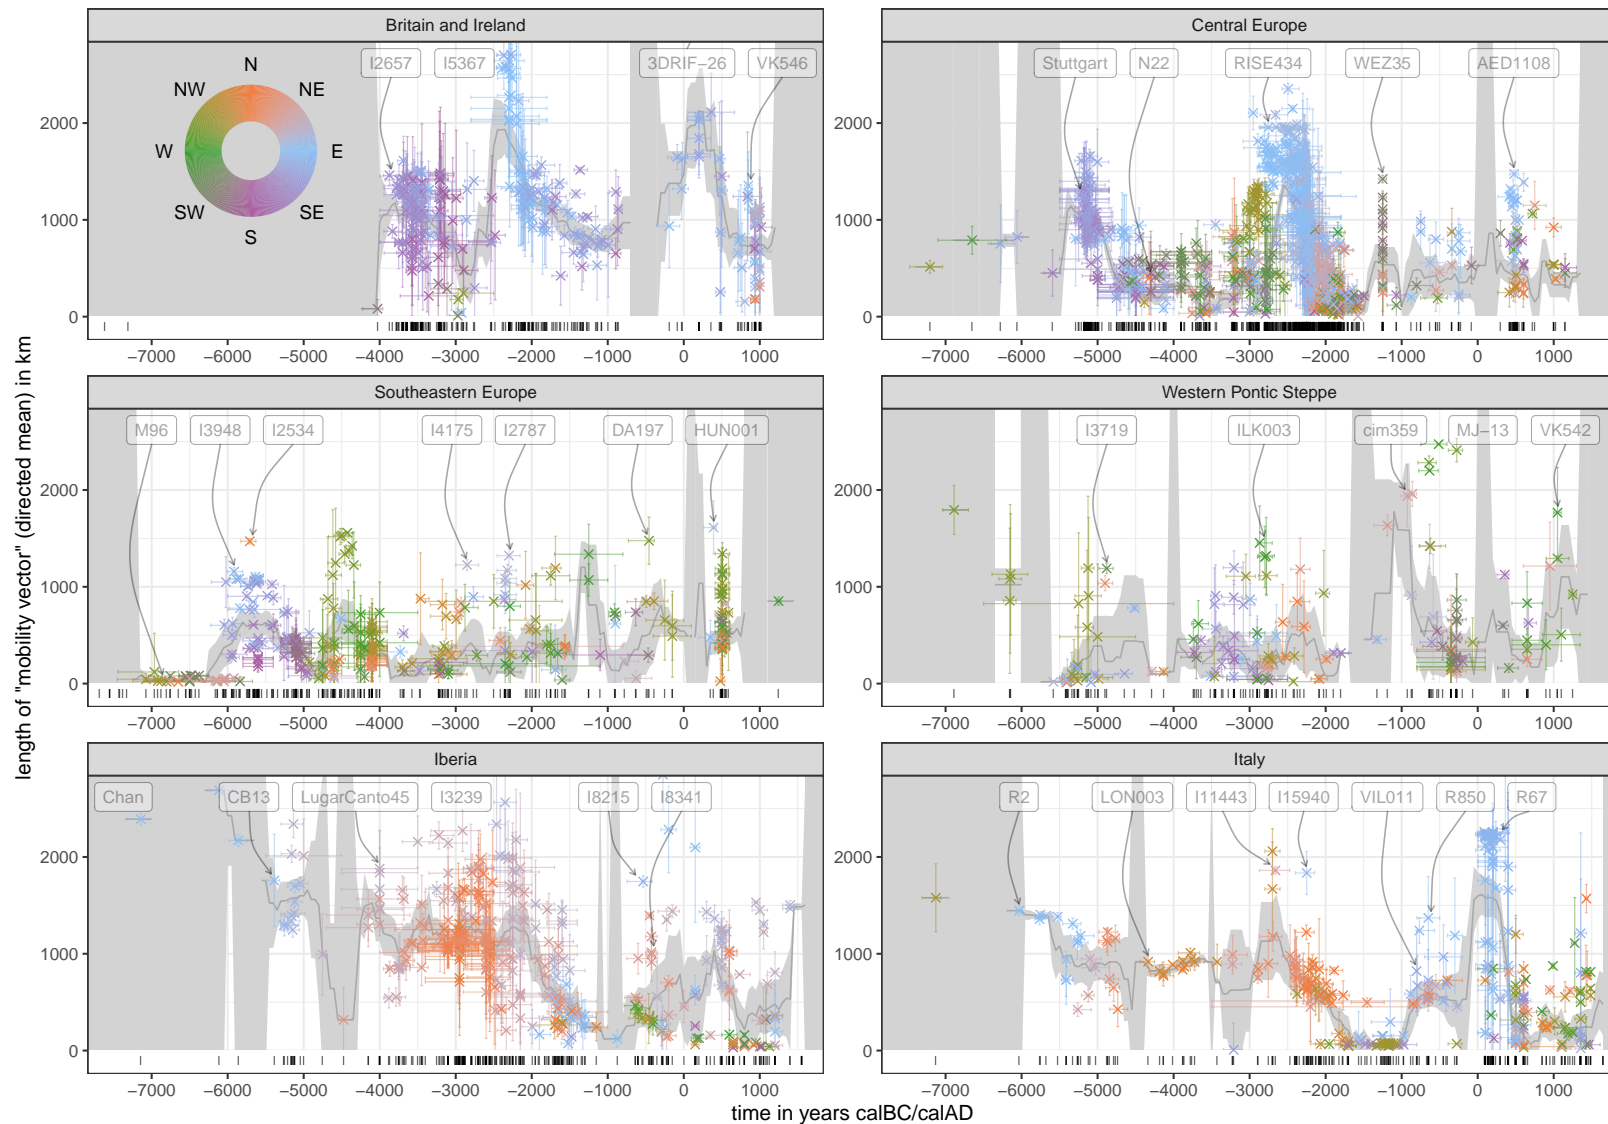

**Figure S10:** Regional mobility curves just as in Figure 5 for the mobility estimation run with the first two MDS dimensions (MDS2). Identical to Figure 5, but with the two additional regions *Southeastern Europe* and *Western Pontic Steppe*.



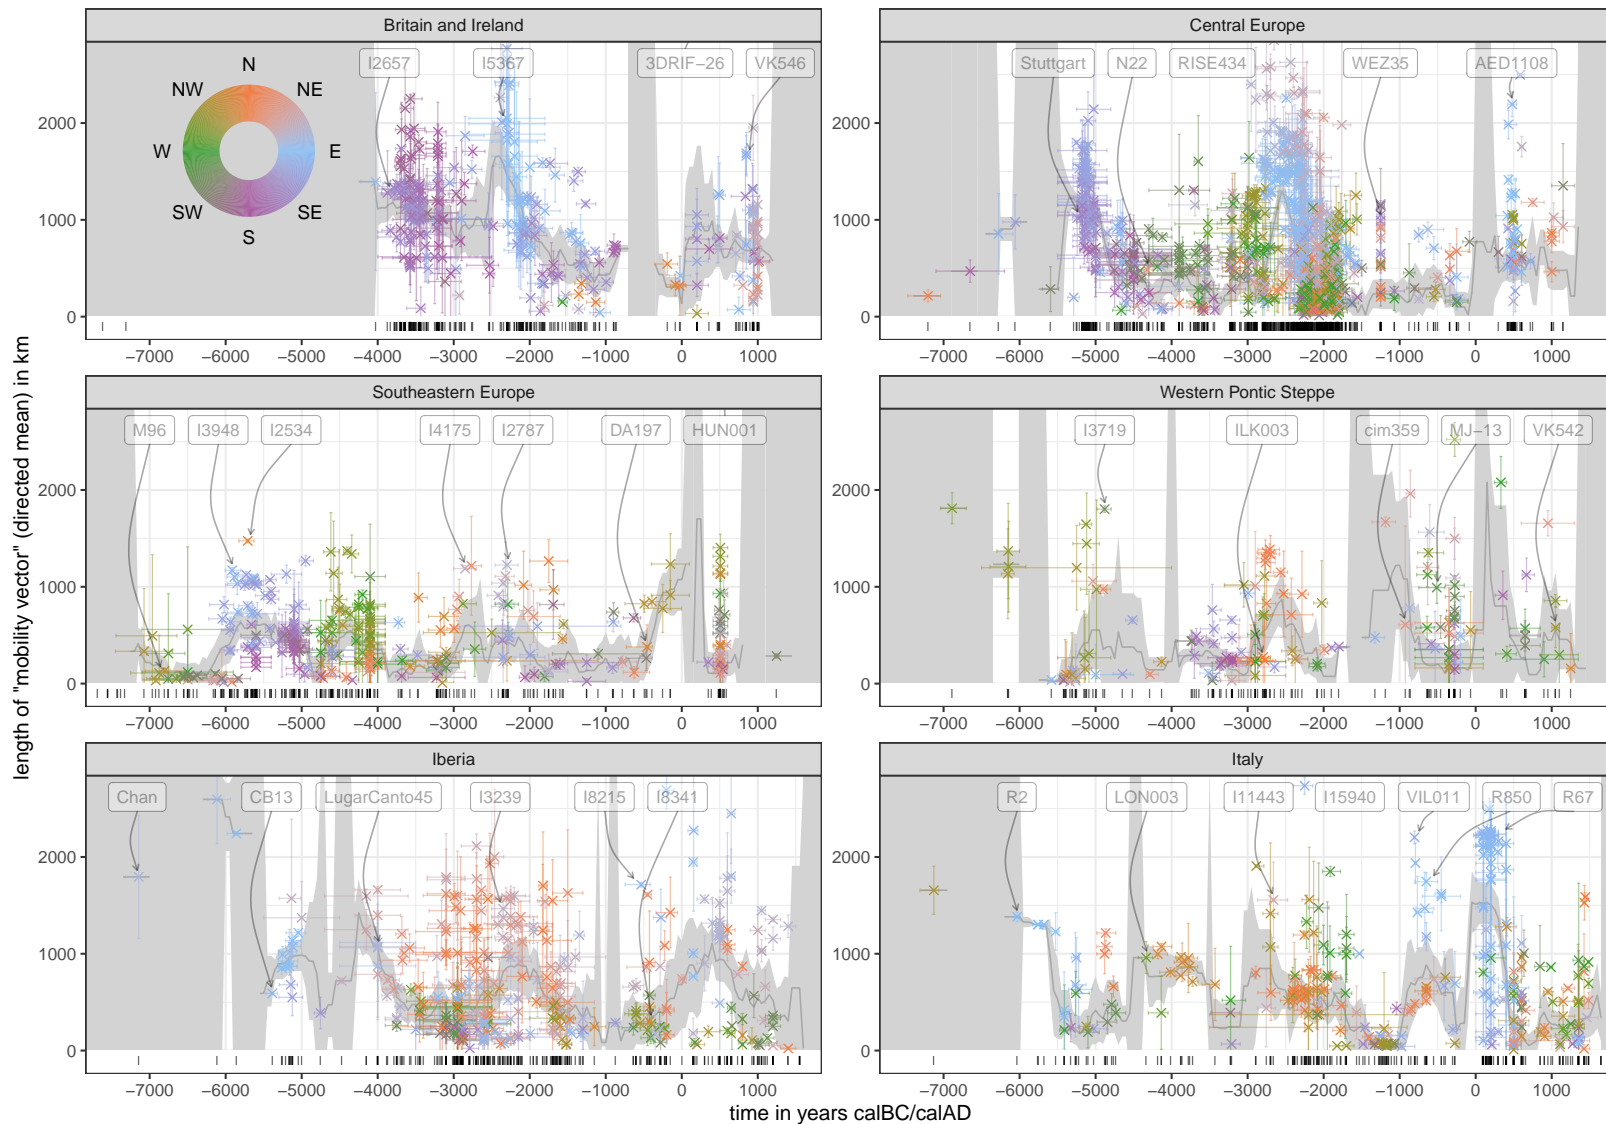

**Figure S11:** Regional mobility curves for an mobility estimation run with the first five Projection PCA dimensions (PCA5). Beyond that just as Figure S10. See Figure S34 for a direct comparison.

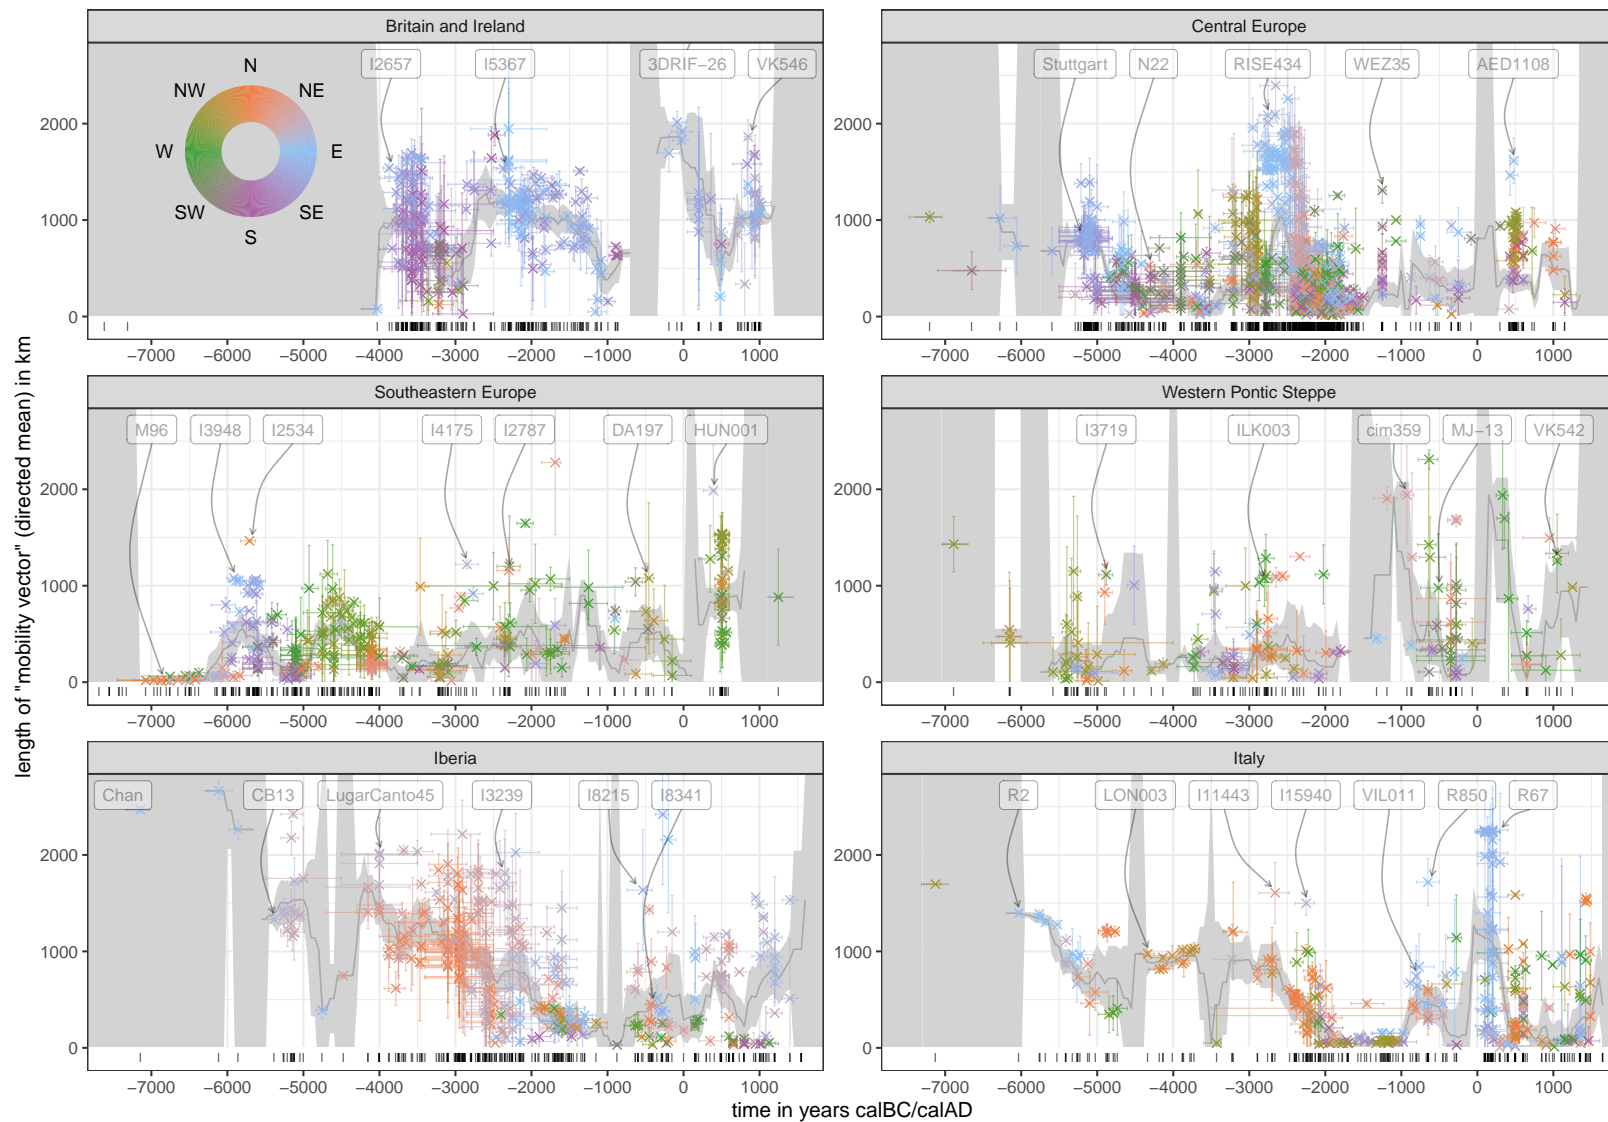

**Figure S12:** Regional mobility curves for an mobility estimation run with the first two MDS dimensions (MDS2) and a lower retrospection distance.

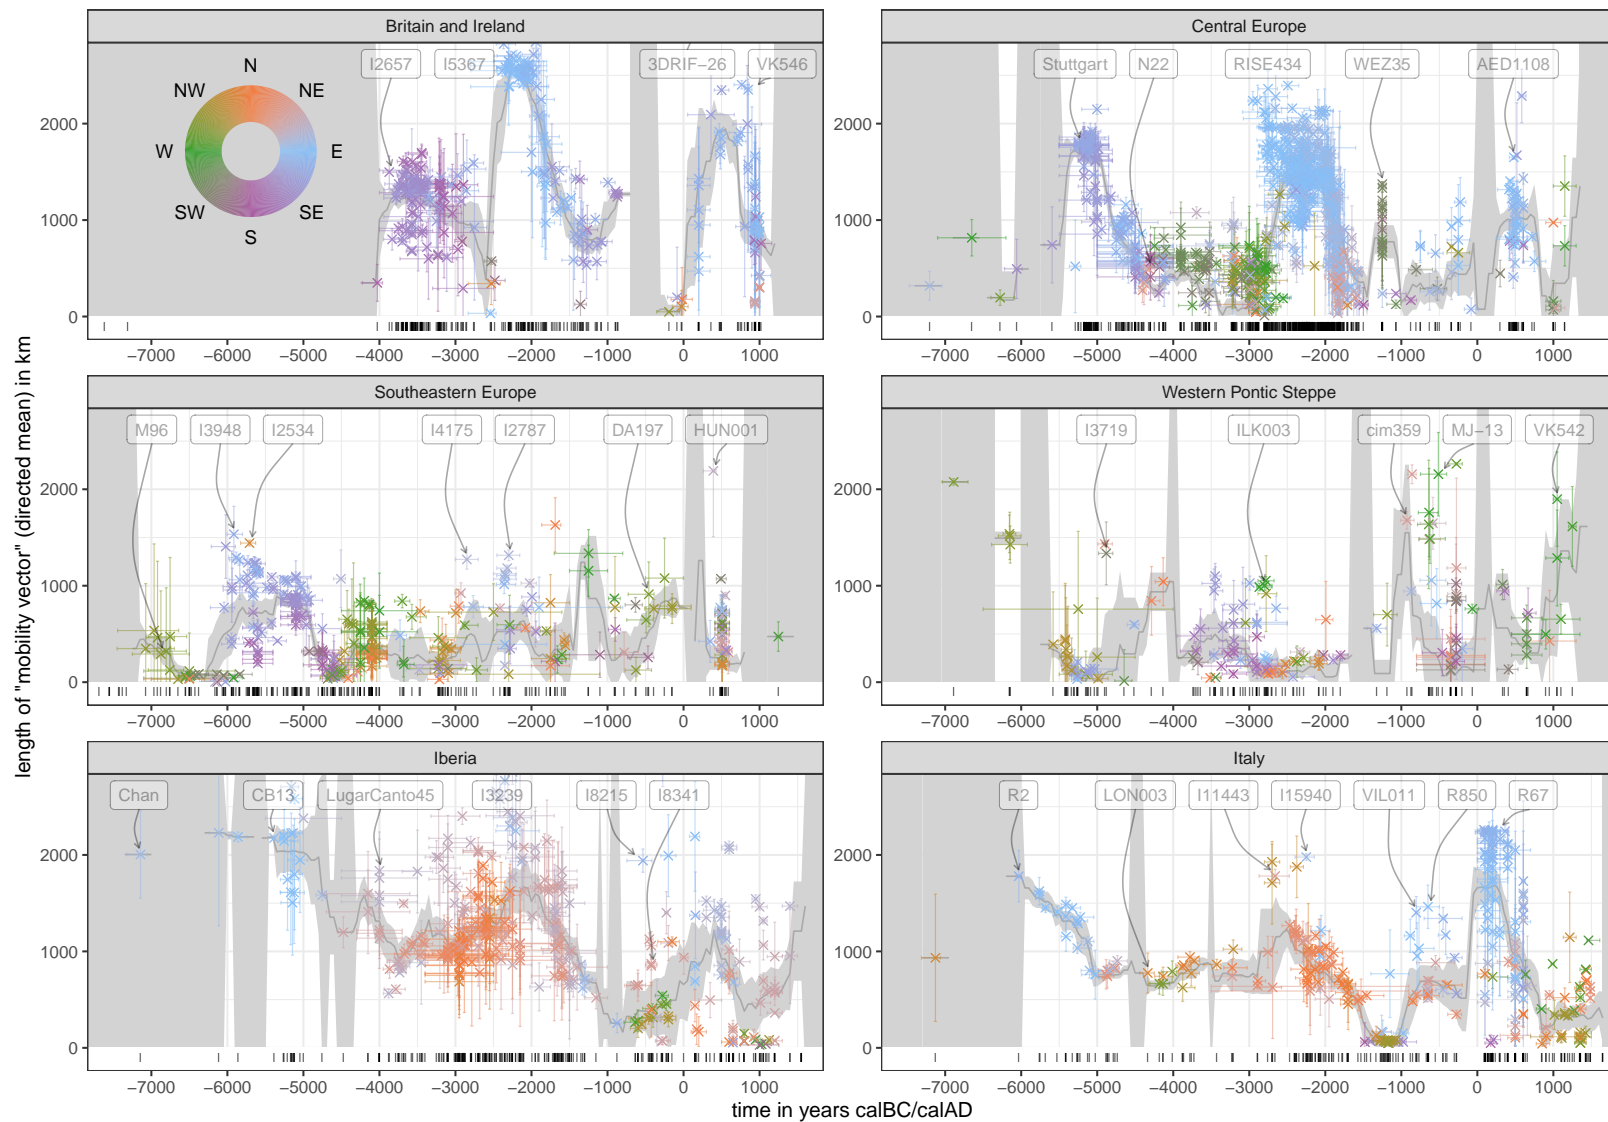

**Figure S13:** Regional mobility curves for an mobility estimation run with the first two MDS dimensions (MDS2) and a higher retrospection distance.

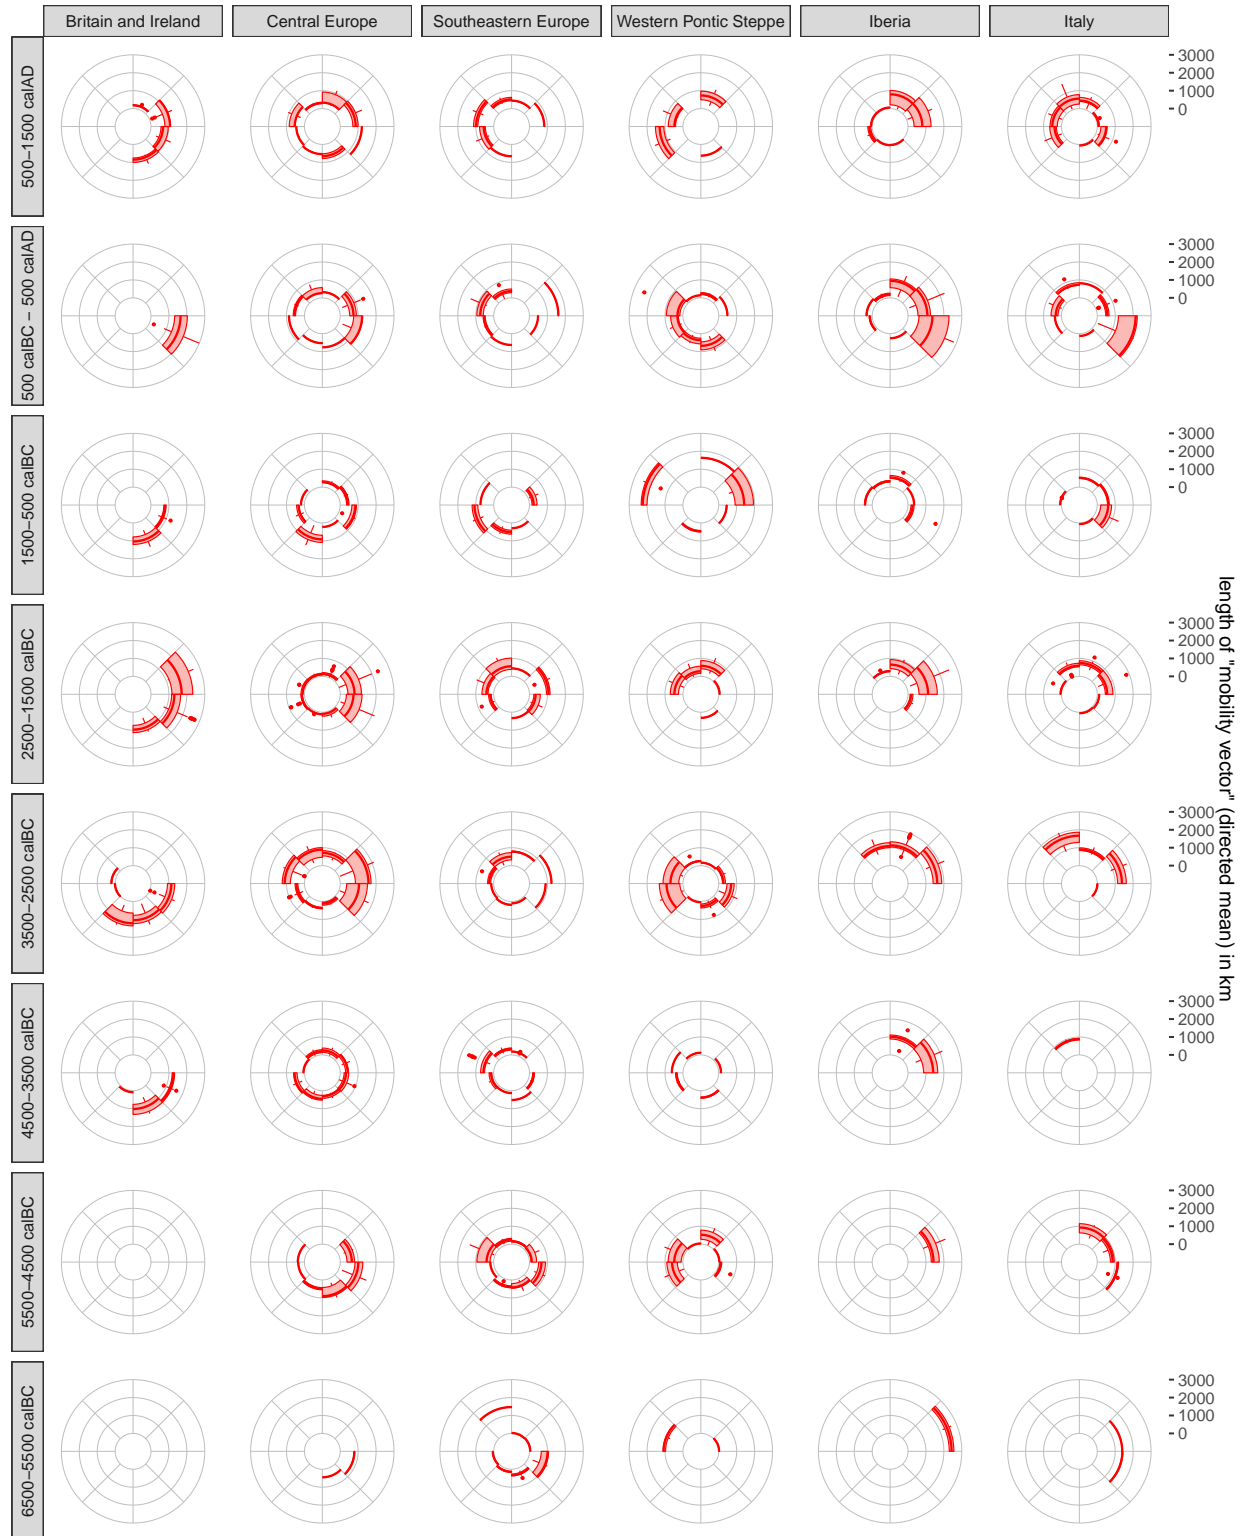

**Figure S14:** Another view on the data in Figure S10. Here the sample-wise mobility vectors are attributed to a group given by the analysis region, a 1000-year time window and the  $45^\circ$  angle range. Each region-time window group is represented by one plot in the plot matrix. These individual plots show the distribution of directed distances within each  $45^\circ$  window as a boxplot in a circular coordinate system (windrose plot). The plot matrix maps time from bottom to top and the analysis regions on the horizontal axis from left to right.

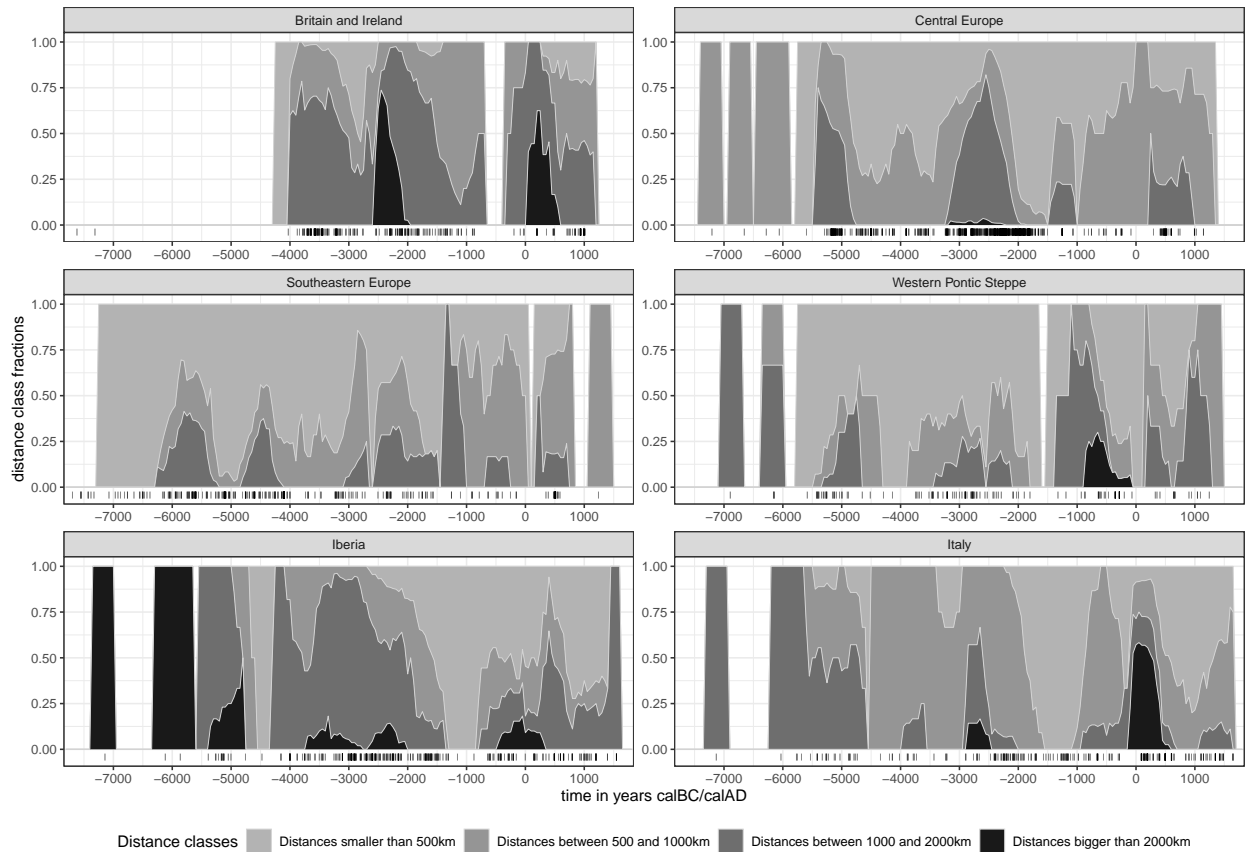

**Figure S15:** Another view on the data in Figure S10. The same sliding window used to calculate the moving mean and standard error for Figure S10 was employed here to determine proportions of distance vectors smaller, in between and bigger 500, 1000 and 2000 kilometres. These fractions are displayed as region-wise stacked area charts. No-data windows are left blank.

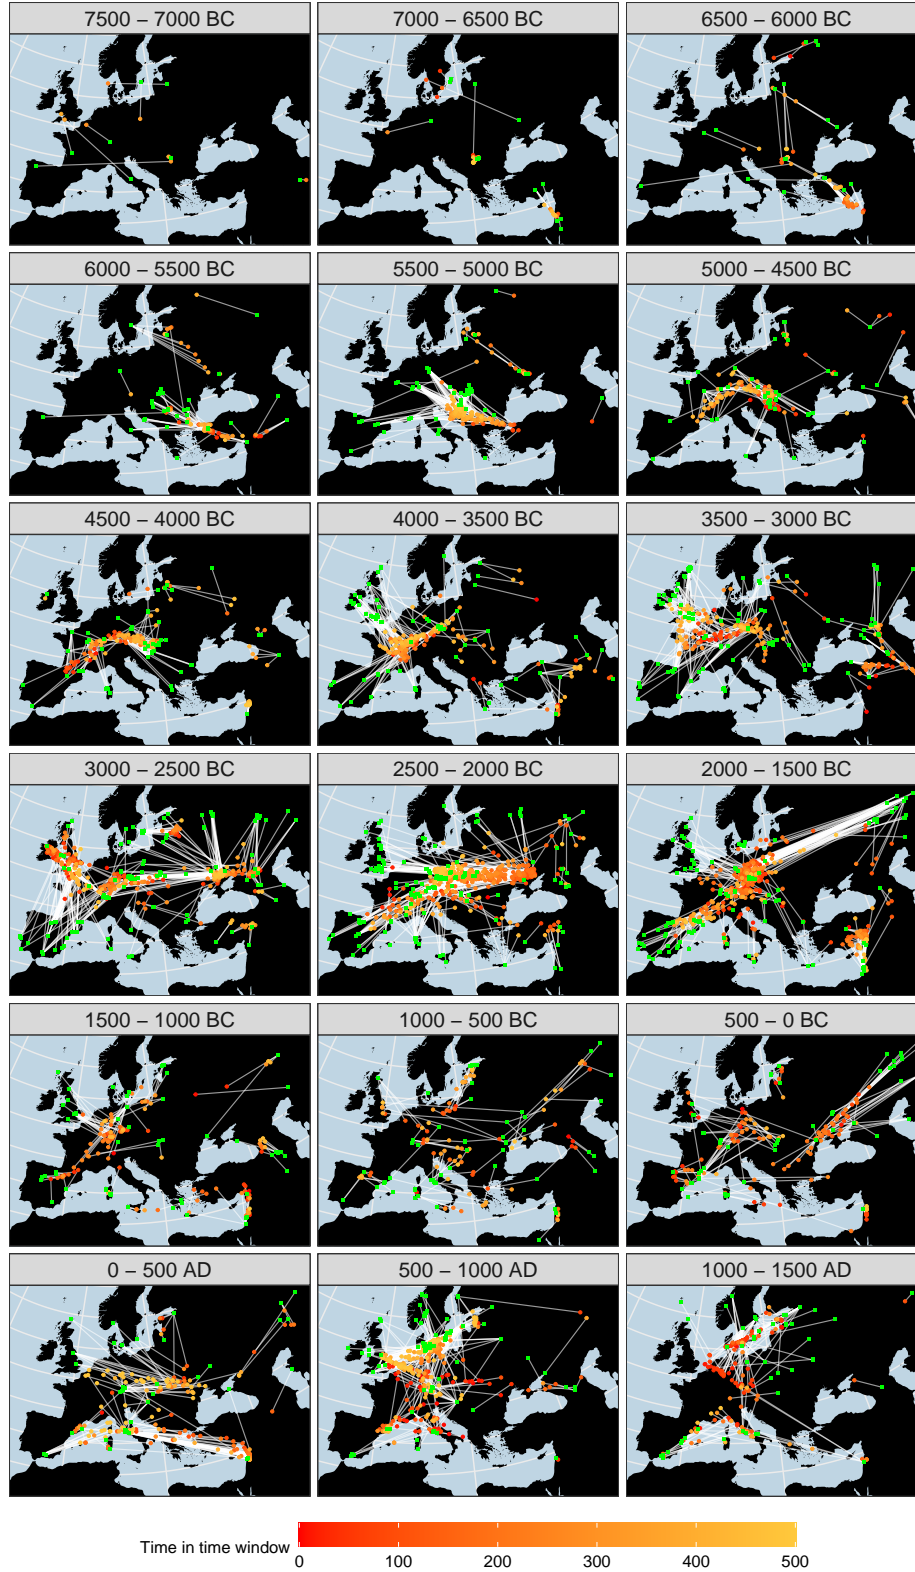

**Figure S16:** Another view on the data in Figure S10. Each subplot in the plot matrix covers a 500-year time window, where each mobility vector is shown as a white line, connecting the sampling location (so usually the place of death) in green with the reconstructed point of highest genetic similarity one default retrospection distance in the past. These points are coloured by a gradient indicating sample age within the respective 500-year time window. This is helpful to see some processes, for example in the 2500-2000BC time window.



## B Meta information for the Datasets S1, S2 and S3

### Dataset S1: Sample context information

Lists context information for all individuals/samples that went into the analysis.

1. **Sample\_ID**: An identifier for the individual/sample (taken from the AADR's "Version ID")
2. **Genetic\_Sex**: Genetic sex as listed in the AADR
3. **Group\_Name**: A "population"/group the individual is attributed to in the AADR dataset (AADR: "Group ID")
4. **Publication**: Publication from which the data for the respective sample was taken. The short publication keys are resolved on the AADR website: <https://reich.hms.harvard.edu/allen-ancient-dna-resource-aadr-downloadable-genotypes-present-day-and-ancient-dna-data> (AADR: "Publication"). The publications providing the samples are also listed in section D at the end of this document
5. **Country**: The modern day country where the sample was recovered (AADR: "Country")
6. **Region**: The spatial macroregion the sample is coming from (as defined for this paper, see Figure 1)
7. **Latitude**: Latitude of sample location (AADR: "Lat.")
8. **Longitude**: Longitude of sample location (AADR: "Long.")
9. **Date\_BC\_AD\_Start**: Likely starting point of the age range of the sample. Negative values indicate years BC, positive values years AD
10. **Date\_BC\_AD\_Median**: Likely center point of the age range of the sample
11. **Date\_BC\_AD\_Stop**: Likely end point of the age range of the sample
12. **Date\_C14**: Radiocarbon dates recorded for this sample in the AADR
13. **Age\_Group**: Millennium into which **Date\_BC\_AD\_Median** falls

For the dating information we parsed the AADR column *Full Date: One of two formats. (Format 1) 95.4% CI calibrated radiocarbon age (Conventional Radiocarbon Age BP, Lab number) e.g. 2624-2350 cal-BCE (3990±40 BP, Ua-35016). (Format 2) Archaeological context range, e.g. 2500-1700 BCE.* Contextual, archaeological age ranges are directly represented here in **Date\_BC\_AD\_Start** and **Date\_BC\_AD\_Stop**, with **Date\_BC\_AD\_Median** as the center point of a uniform distribution between start and end. When radiocarbon dates were available (listed in **Date\_C14**), we recalibrated them with the IntCal20 calibration curve to determine the 95.4% range and the center of the post-calibration probability density distribution for **Date\_BC\_AD\_Start**, **Date\_BC\_AD\_Stop** and **Date\_BC\_AD\_Median**. Multiple dates were combined as a simple, normalized sum of said distribution ("sum calibration").

## 61 **Dataset S2: Results of multivariate analysis**

62 Shows the result coordinates for the multivariate analysis with EMU, MDS and PCA. **Sample\_ID** is shared  
63 with Dataset S1. The remaining 80 columns emerge as the product of ten output dimensions (C1-C10), four  
64 multivariate analysis methods (EMU, MDS, PCA, Projection PCA) and two SNP sets (unfiltered "u", filtered  
65 "f"). Each column name encodes this parameter combination as follows: **{output-dimension}\_{multivar-**  
66 **method}\_{SNP-set}** (e.g. C1\_mds\_u, C3\_pca\_proj\_u).

## 67 **Dataset S3: Results of the large-scale mobility estimation**

68 Includes summary statistics for the large mobility estimation run. See Supp. Text 3 for more details on  
69 this algorithm. **Sample\_ID** is shared with Dataset S1. The columns from column 5 onwards appear in  
70 multiple iterations for the permutations of spatiotemporal dimensions, multivariate analysis methods and  
71 retrospection distances. All values are rounded to full integers.

- 72 1. **Sample\_ID**: An identifier for the individual/sample (taken from the AADR's "Version ID")
- 73 2. **search\_x**: The spatial x-axis coordinate of the (archaeological) site where a sample was found. Coor-  
74 dinates are rounded and given in kilometres according to EPSG:3035 (ETRS89 Lambert Azimuthal  
75 Equal-Area, "European grid") after conversion from the AADR's WGS 84 latitude and longitude co-  
76 ordinates
- 77 3. **search\_y**: The respective y-axis coordinate
- 78 4. **search\_z**: Rounded mean age of the sample across the temporal resampling iterations The similarity  
79 search was repeated in many iterations with different ages drawn from the age range probability  
80 distributions. **search\_z** is the rounded mean of these values
- 81 5. **field\_[xyz]\_{multivar-method}\_{retrospection-distance}**: Mean (across the temporal resampling  
82 iterations) spatiotemporal coordinates of the field point with highest similarity probability: The mean  
83 end point of the mobility vector
- 84 6. **ov\_[xy]\_{multivar-method}\_{retrospection-distance}**: Mean (across the temporal resampling it-  
85 erations) length of the mobility vector in x or y direction
- 86 7. **ov\_dist\_{multivar-method}\_{retrospection-distance}**: Mean (across the temporal resampling it-  
87 erations) length of the mobility vector. See Supp. Text 3 for more details on how exactly this mean is  
88 calculated.
- 89 8. **ov\_dist\_se\_{multivar-method}\_{retrospection-distance}**: Standard error of the mean of all tem-  
90 poral resampling iteration mobility vector lengths
- 91 9. **ov\_dist\_sd\_{multivar-method}\_{retrospection-distance}**: Standard deviation of all temporal re-  
92 sampling iteration mobility vector lengths
- 93 10. **ov\_angle\_deg\_{multivar-method}\_{retrospection-distance}**: Direction of **ov\_dist** as an angle  
94 in degree ( $0 - 360^\circ$ )



# 1 Supplementary Text: Creating a simplified genetic space

For the analysis in this paper it was necessary to derive simplified, genetic ancestry components for each ancient DNA sample that should be considered in the spatiotemporal model. Each sample should be genetically positioned with coordinates in an  $n$ -dimensional space, where  $n$  is far smaller than the several hundred thousand single nucleotide polymorphisms (SNPs) potentially available for it. Such dimension-reduction is a common application in archaeogenetics, where multivariate analyses are usually employed to make complex admixture patterns readily accessible for visual inspection. Among the most popular methods is principal component analysis (PCA) with modern reference samples, onto which ancient samples are mathematically projected [1].

## 1.1 Finding the most suitable multivariate analysis method

We explored different ways of dimension reduction, and different numbers of target dimensions  $n$ . We limited our search to  $n \leq 10$  and the following four methods:

- MDS as implemented in plink v1.9 [2] using 1-IBS pairwise distances
- PCA as implemented in the smart SNP R package v1.1 [3] with simple mean-frequency imputation of missing values
- Projection PCA as implemented in smart SNP with a set of modern, Western Eurasian reference populations extracted from the AADR dataset
- EMU, a PCA implementation with significantly more sophisticated imputation of missing values compared to PCA. Provided by the emu command line tool v0.9 [4]

Figure S2 shows the scatter plots of the first (C1) and the second (C2) output dimension for these methods. The subplots **E** and **F** already indicate that simple PCA with mean imputation is not capable to distinguish spatiotemporal clusters as clearly as the other methods, which we think is due to the underperforming imputation of missing data in ordinary PCA using mean allele frequencies. Experiments with the correlation and out-of-sample prediction analysis below confirmed this observation: Simple PCA performed worse there by a factor of 2 to 3. We therefore decided to exclude this method right away from further consideration.

We also saw a clear separation of samples that were prepared via untargeted shotgun sequencing and samples that went through a target-enriching capture preparation step (usually for the 1240K SNP set) on the third output dimension of both the MDS and the EMU analysis (Figure S3). This effect was already highlighted by Margaryan et al. 2020 (Supplementary Note 8 - Genetic clustering) [5]. In an attempt to mitigate the effect of this undesired, as for our analysis irrelevant, cofactor, we applied a simple association analysis (`plink --assoc`) to identify and remove SNPs from our input dataset, that are significantly correlated with the shotgun vs. capture variable ( $p < 0.001$ ).

That left us with the following SNP filter workflow and two main SNP sets for the comparison analysis:

|                                                                                                                                                                                                                                                                                          | # of samples | # of SNPs     | Identifier SNP set |
|------------------------------------------------------------------------------------------------------------------------------------------------------------------------------------------------------------------------------------------------------------------------------------------|--------------|---------------|--------------------|
| Starting point (AADR V50.0, 1240K)                                                                                                                                                                                                                                                       | 10391        | 1233013       |                    |
| - Selecting spatiotemporally relevant samples<br>- Removing samples below data quality threshold (SNP count, contamination)<br>- Genomic range filtering according to [6, 7] (see Materials and Methods in the main text)<br>- Removing SNPs below a 1% minor allele frequency threshold | 3530         | 963289        |                    |
| - Removing samples from related individuals<br>- Removing SNPs below a 5% maf threshold                                                                                                                                                                                                  | 3191         | <u>847053</u> | unfiltered SNP set |
| - Removing SNPs that are associated to shotgun vs. capture data preparation<br>- Removing samples now below SNP count threshold                                                                                                                                                          | <u>3138</u>  | <u>705367</u> | filtered SNP set   |

129 To make an informed decision about which of the remaining multivariate analysis methods (MDS, Projec-  
130 tion PCA or EMU), number of dimensions  $n$ , and SNP set (unfiltered or filtered) to use, we employed three  
131 quantitative measures that, as we argue below, are informative on the suitability of a given genetic space to  
132 allow for good similarity probability estimates with a spatiotemporal model as desired for this analysis:

- 133 • Normalised mean Euclidian distance in the reduced genetic space for very low spatiotemporal distance  
134 pairs (the "nugget")
- 135 • Correlation of pairwise (reduced) genetic and spatiotemporal distance
- 136 • A normalized measure of true and estimated distances in the reduced genetic space (according to the  
137 eventually desired spatiotemporal interpolation model)

138 Figure S17 summarizes the results for these metrics.

139 The nugget term in S17 **A** is introduced in more detail below in Supp. Text 2. It is calculated inde-  
140 pendently for every output dimension of the respective multivariate analysis and functions as a normalized  
141 proxy for pairwise genetic distances of samples that are close in space and time (often even from the same  
142 archaeological site or burial context). For this plot the nuggets are determined not directly from the (genetic)  
143 output coordinates, but for the residuals of a linear model (see Supp. Text 3). As they are computed from  
144 pairs of samples close-by in space and time, nuggets are a direct estimate of local noise in the reduced genetic  
145 space. We generally observe lower nuggets for the first output dimensions compared to more derived ones,  
146 which indicates that the first dimensions have a higher signal to noise ratio. The increase of the nugget  
147 along the dimension count is not linear, though, with different growth patterns for the different multivariate  
148 methods.

149 The measure in Figure S17 **B** is calculated as the correlation of pairwise "genetic" distance (Euclidean  
150 distance in the multivariate output dimension space up to dimension  $n$ , so e.g. C1-C7 for C7), and pairwise  
151 spatiotemporal distance (Euclidean spatiotemporal distance scaled with 1 year = 1 kilometre) (e.g. Figure  
152 S18). We report the  $R^2$  value to summarise the output, so a higher value indicates a stronger correlation. All  
153 methods perform generally well, and higher-dimensional spaces seem to be linked to some degree to higher  
154 correlations for MDS and EMU up to C7. This does not necessarily contradict the results for the nugget  
155 term: Here long-distance correlation dominates the result, which is deliberately omitted in the nugget. We  
156 also observe, that the filtered SNP set performs consistently worse in all instances of this correlation test,  
157 probably because the filter is not perfect and also removes valuable information.

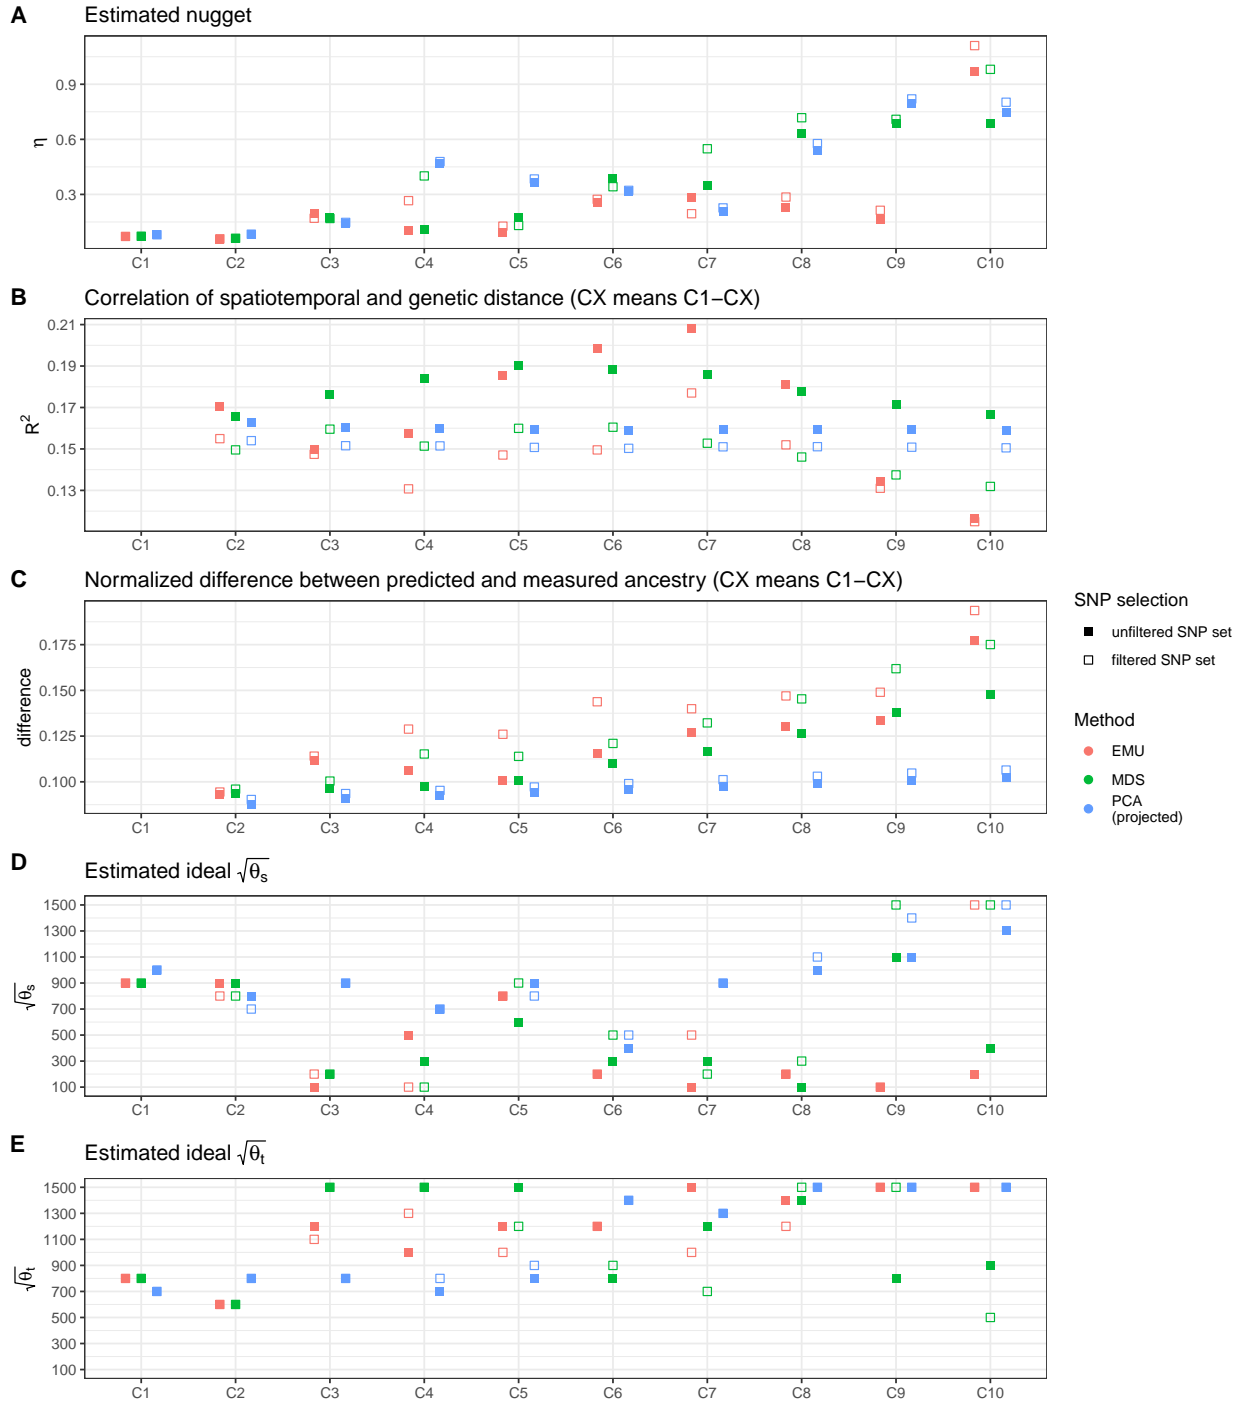

**Figure S17:** Various measures to compare differently calculated genetic spaces.

158 Figure S17 C summarises the measure we ultimately consider the most informative: The predictive  
 159 accuracy of a spatiotemporal Gaussian process regression model in a cross-validation setup as explained in  
 160 Supp. Text 2. Each dimension for each multivariate method is modelled independently with the ideal nugget  
 161 and kernel parameter setting for a 9/10 training dataset. We then compare the difference of actual and  
 162 predicted values for a 1/10 test dataset through the multivariate output dimension space (again: for example

163 C7 on the x-axis means C1-C7). The differences shown in Figure S17 C are normalised by the mean pairwise  
 164 distance in said space to make them comparable across methods (a similar normalisation as done in the  
 165 calculation of the nugget). Projection PCA performs best by that metric, especially for higher-dimensional  
 166 spaces. EMU and MDS lose accuracy quickly, the former already for C1-C3, the latter after C5. Note that the  
 167 general increase of values towards more included dimensions is expected due to the "curse of dimensionality".

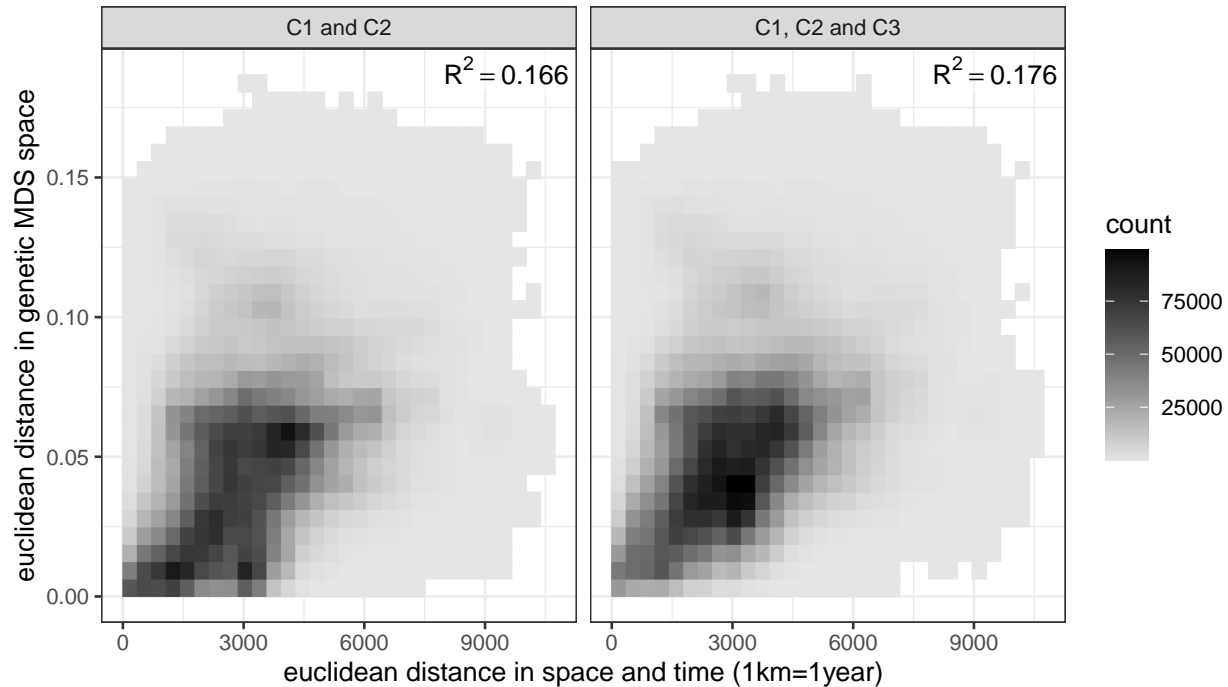

**Figure S18:** Correlation of pairwise genetic and spatiotemporal distance with genetic distance in two- or three-dimensional MDS space. The pairwise distances are counted in bins and plotted as a density raster.

168 To conclude, the observations for these three measures together do not necessarily lead to an obvious  
 169 decision which multivariate analysis method,  $n$ , and SNP set is optimal for the spatiotemporal mobility  
 170 estimation we want to attempt. In an iterative process we could rule out some options, though:

171 The reduced, filtered SNP set performs almost always worse than its unfiltered counterpart. It clearly  
 172 avoids some of the shotgun vs. capture bias, but there seems to be spatiotemporal information encoded  
 173 exactly in this distinction – maybe through a complex interaction of the archaeological record, preservation  
 174 and research history. We seem to be better off with the additional 140,000 SNPs and decided to abandon  
 175 the filtered dataset.

176 The question which multivariate method to use is harder to decide – at least for low-dimensional spaces.  
 177 Our understanding is, that Projection PCA, EMU and MDS generally perform similarly well on C1 and C2,  
 178 with various local optima where one method trumps the others. Here we resorted to external factors, like  
 179 the complexity of the underlying algorithm and the amount of additional parameters necessary for a given  
 180 method, assuming that simpler and less is generally preferable. EMU employs a relatively complex imputation  
 181 algorithm on top of normal PCA, and Projection PCA requires a set of modern reference populations, which  
 182 has critical influence on the genetic space it generates. We therefore decided to rely on MDS (**MDS2**) for the  
 183 analysis presented in the main text. This includes the implicit assumption that the method would produce  
 184 similar and robust results even with other pairwise distance metrics beyond the 1-IBS measure we employed.

185 A forced limitation to C1 and C2 has the additional advantage that a 2D "genetic map" is relatively easy to  
186 visualize and understand – one can intuitively conclude that its structure is meaningful on the spatial and  
187 temporal scale of our analysis.

188 For higher dimensions beyond C2, MDS and EMU can be ruled out entirely due to the extreme bias the  
189 shotgun vs. capture distinction introduces (Figure S3) and which we could not reliably cancel out via SNP  
190 filtering. Projection-based PCA has a massive advantage here, as it relies on an optimized, external data  
191 source to inform the structural properties of the genetic space. It is robust for all the ten dimensions we  
192 tested, and adding more dimensions could barely deteriorate correlation or predictive accuracy. It is unclear  
193 though, how many of these additional components  $n$  add value to the similarity search implemented for this  
194 paper. Figure S8 explores this question with a set of test individuals and search settings. Adding dimensions  
195 beyond C3 does not visibly change the respective probability landscapes, but the position of maxima can  
196 suddenly change, if there are multiple relevant peaks. It is likely that this effect would continue also beyond  
197 C10. Based on the observation that the estimated values for  $\sqrt{\theta_s}$  and  $\sqrt{\theta_t}$  seem to follow a different dynamic  
198 from C5 onwards for the PCA (Figure S17, **D** & **E**), which indicates some change in the setup of these  
199 variables, we decided to only consider C1-C5 (**PCA5**) for a second run of the mobility curve determination  
200 for Western Eurasia (beyond **MDS2**).

## 2 Supplementary Text: Interpolation parameter estimation

A key component of this paper is the interpolation of a genetic ancestry field based on the output dimensions of different multidimensional analysis methods. Here, we use Gaussian process regression, which is a parameterised method. The following section explains the process we went through, to find an optimal set of parameters. For increased clarity the plots only show the results for the first two or three output dimensions of our MDS run with the unfiltered SNP set (see Supp. Text 1). As discovered above, the third dimension is highly biased by the library preparation (capture vs. shotgun) and not directly correlated to space and time. When we include it below, then only as a didactic reference point.

We consider a number of individuals distributed in space and time, with a single-dimensional (scalar) genetic MDS (or PCA) component as dependent variable. We use the notation  $(x_i, y_i, t_i, g_i)$  to denote for each data point  $i$  the set of spatial coordinates ( $x_i$  and  $y_i$ ), an age  $t_i$  and the value of the genetic component  $g_i$ .

We intend to model our data points as a random Gaussian process, for which we are using the laGP R package for local approximate Gaussian process regression [8]. As a technical note, one of the assumptions in this package is a mean of zero in the Gaussian process, which we exactly achieve by first fitting a linear model to the data, and then considering the *residuals* instead of the original genetic values.

In mathematical terms, the model including the linear fit can be presented as

$$g \sim ax + by + ct + g'(x, y, t) \quad (1)$$

where  $g'$  reflects a mean-zero random field, which we model with GPR. For simplicity, and because this is a one-time operation, we just continue using the notation  $g_i$ , now actually denoting the residuals of the linear model instead of the raw genetic component.

A key ingredient for Gaussian process regression is the covariance kernel function, for which we here follow the standard choice of a squared exponential, which in general terms for p-dimensional input data and in the notation of laGP is defined as

$$Cov(x, x') = \tau^2 \left( \exp \left[ - \sum_{k=1}^p \frac{(x_k - x'_k)^2}{\theta_k} \right] + \eta \delta(x - x') \right) \quad (2)$$

where  $x$  and  $x'$  are positions in p-dimensional space, and  $\theta_k$  are lengthscale parameters for each dimension  $k$ .  $\eta$  is a dimension-less additional noise term to be added only if  $x = x'$ , using the delta-distribution, the so called nugget term.  $\tau^2$  is a general scaling parameter.

Specifically for the purpose of spatio-temporal modelling with isotropic space, we write this covariance function as

$$Cov(r, u) = \tau^2 \left( \exp \left[ - \left( \frac{r}{\rho} \right)^2 - \left( \frac{u}{\alpha} \right)^2 \right] + \eta \delta(x - x') \right) \quad (3)$$

where we have changed notation slightly, and introduced the spatial kernel radius  $\rho$  and the temporal kernel radius  $\alpha$ , which by construction have now length- and time-dimensions (measured in years and kilometres, respectively).

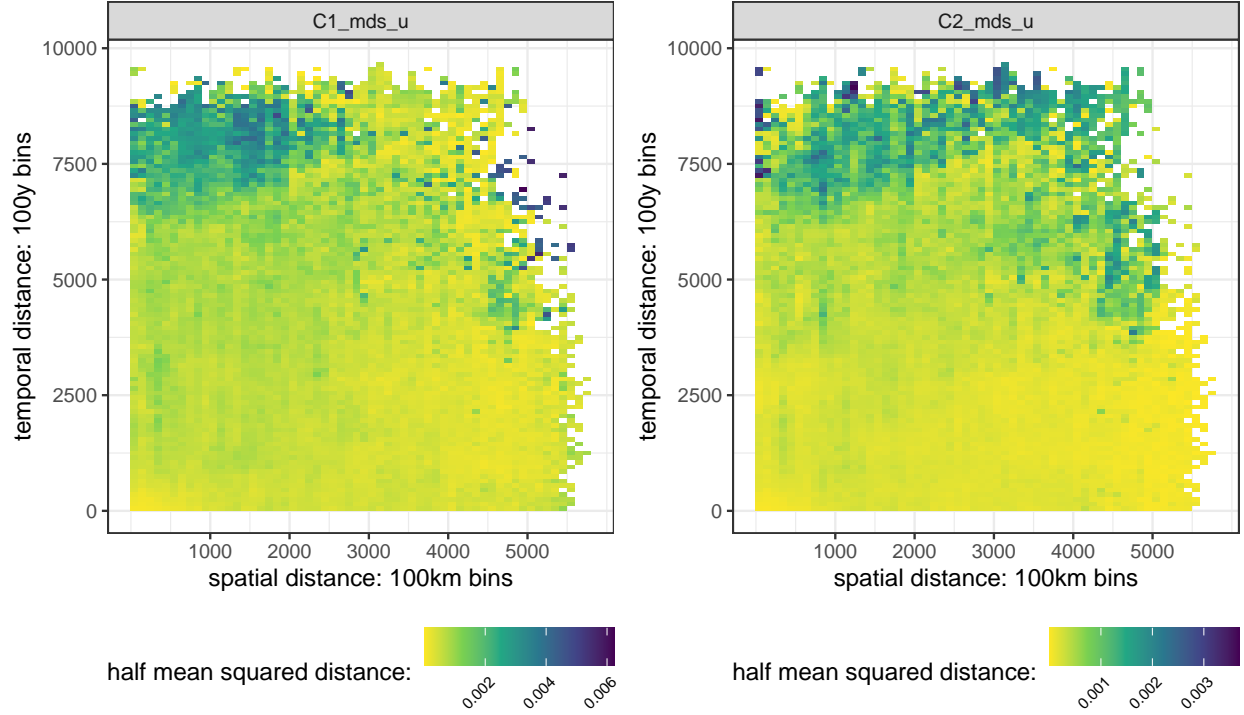

**Figure S19:** Empirical semivariogram rasters calculated including all samples in the analysis dataset, with one plot for each ancestry component (MDS coordinate) C1 and C2. The fill colour represents the mean squared pairwise distance in the respective space-time bin. For some basic detrending these distances were calculated not directly on the ancestry components, but on the residuals of a simple linear model, where the genetic coordinates for each sample are predicted by their spatiotemporal position.

## 231 2.1 Variogram analysis

232 One possibility to inspect plausible parameters for  $\tau$ ,  $\eta$ ,  $\rho$  and  $\alpha$  as defined in 3 is variogram analysis (see  
 233 also [9], [10]).

234 It is instructive to first consider variograms in the context of continuous fields, where the field value  
 235  $g(x, t)$  is defined at all spatial points  $x$  (which in our case are two-dimensional) and all time points  $t$ . The  
 236 semivariogram is then defined as the mean squared difference of field values at given spatial and temporal  
 237 distances:

$$V(r, u) = \frac{1}{2} \langle (g(s, t) - g(s + r, t + u))^2 \rangle_{s, t} \quad (4)$$

238 where the average runs over all space-time points  $(s, t)$ .

239 Under the assumption of constant variance  $\langle g(s, t)^2 \rangle = \langle g(s + r, t + u)^2 \rangle$  for all  $s, r, t, u$ , we can establish  
 240 the relationship of the semivariogram and the covariance function of the Gaussian process:

$$\begin{aligned}
V(r, u) &= \frac{1}{2} \langle (g(s, t) - g(s + r, t + u))^2 \rangle_{s, t} \\
&= \frac{1}{2} \langle g(s, t)^2 - 2g(s, t)g(s + r, t + u) + g(s + r, t + u)^2 \rangle \\
&= \frac{1}{2} (\langle g(s, t)^2 \rangle - 2\langle g(s, t)g(s + r, t + u) \rangle + \langle g(s + r, t + u)^2 \rangle) \\
&= \frac{1}{2} (Cov(0) - 2Cov(r, u) + Cov(0)) \\
&= Cov(0) - Cov(r, u)
\end{aligned} \tag{5}$$

241 with  $Cov(r, u) = \langle g(x, t)g(x + r, t + u) \rangle$

242 So the variogram is directly related to the covariance of the Gaussian process:

$$V(r, u) = Cov(0) - Cov(r, u) \tag{6}$$

243 Following ref. [10] (p.30), the **empirical semivariogram**, defined for a set of actual datapoints, can  
244 be computed as a binned version of the continuous semi-variogram definition employed above. Specifically,  
245 instead of continuous spatial and temporal "radius" values  $r$  and  $u$ , as in the continuous version, we now  
246 consider bins  $R_k = (r_k, r_{k+1})$  and  $U_l = (u_l, u_{l+1})$ , with boundaries  $r_1 < r_2 < \dots$  and  $u_1 < u_2 < \dots$ . We then  
247 write

$$V(k, l) = \frac{1}{2N(k, l)} \sum_{i, j} (g_i - g_j)^2 I \left( \sqrt{(x_i - x_j)^2 + (y_i - y_j)^2} \in R_k, |t_i - t_j| \in U_l \right) \tag{7}$$

248 where  $I(\text{condition})$  is an indicator function that is 1 if the condition is true and zero otherwise, and the  
249 normalization  $N$  is

$$N(k, l) = \sum_{i, j} I(\sqrt{(x_i - x_j)^2 + (y_i - y_j)^2} \in R_k, |t_i - t_j| \in U_l) \tag{8}$$

250 Figure S19 is one way to visualize this empirical semivariogram  $V(k, l)$  as a raster plot. The bins  $R_k$  and  
251  $U_l$  are here chosen such that  $r_i - r_{i-1} = 100\text{km}$  and  $u_l - u_{l-1} = 100\text{years}$ .

252 To finally determine the kernel parameters from equation 3, one needs to fit the variogram using the  
253 kernel covariance function, thereby learning the four kernel parameters  $\tau^2$ ,  $\eta$ ,  $\rho$  and  $\alpha$ . We realised that in  
254 the case of our data, this was unfortunately not possible, as we cannot co-estimate  $Cov(0)$  and the kernel  
255 radiuses simultaneously. Consider Figure S20, which shows only a single cut through the semivariogram. In  
256 this case, we aim to fit three parameters from this curve (since we consider only the temporal dimension  
257 now). The squared exponential form has three features that we expect to see in the semivariogram: i) An  
258 offset at  $t = 0$  (the left hand side of the variogram), ii) the scale of the increase towards larger values of  $t$ , and  
259 iii) the height of the plateau of the semivariogram. These three features are related to the three parameter  
260 we seek to fit. However, the expected plateau is in our case however never reached. Instead, the covariances  
261 in the genetic space continue to increase towards larger values of temporal distance  $t$ . A similar effect is  
262 seen in one-dimensional cuts through the spatial component of the semivariogram. We believe the lack of  
263 an implicit scale in the semivariogram suggests the presence of many different temporal and spatial scales  
264 in human genetic relatedness (due to various evolutionary processes and mobility acting also on multiple  
265 scales), which precludes estimating a kernel width from the semivariogram directly. The degeneracy of the



266 semivariogram can be directly demonstrated by fitting two kernel models with very different parameters in  
 267 Figure S20.

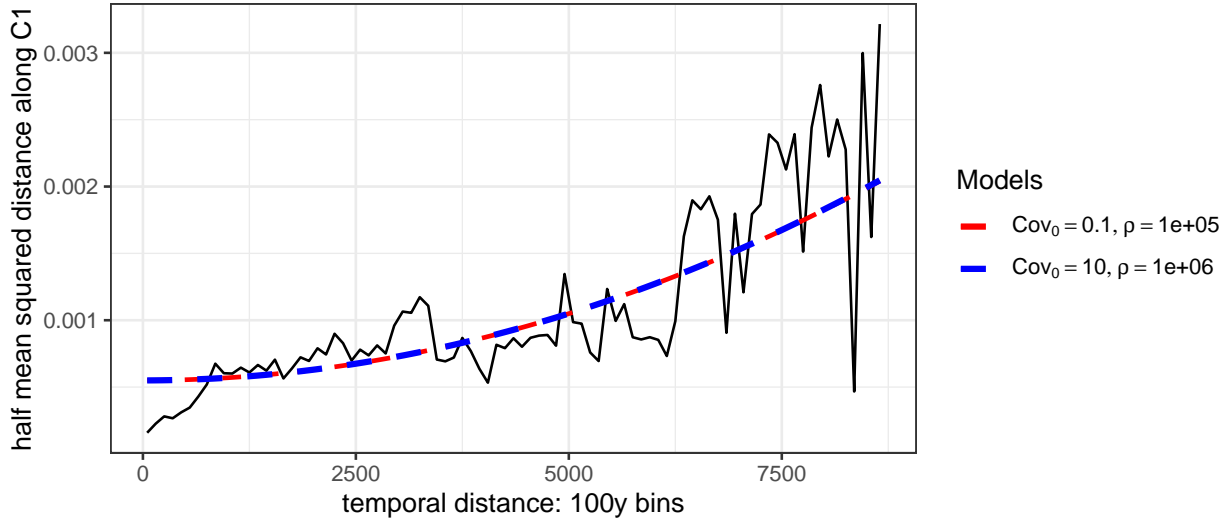

**Figure S20:** A variogram for one time slice ( $x \in [0, 100]$ ) with two different, but equally well fitting exponential models.

268 Indeed: For  $(r/\rho) \ll 1$  we have

$$\begin{aligned}
 \text{Cov}_0 - \text{Cov}_0 * \exp(-(r/\rho)^2) &= \\
 \text{Cov}_0 (1 - \exp(-(r/\rho)^2)) &\approx \\
 \text{Cov}_0 (1 - (1 - (r/\rho)^2)) &= \\
 \frac{\text{Cov}_0}{\rho^2} r^2 &
 \end{aligned} \tag{9}$$

269 where we have used the Taylor expansion for the exponential function:  $\exp(x) = 1 + x + \mathcal{O}(x^2)$ . So for  
 270 small values of  $r/\rho$  (i.e. long before a plateau gets reached) we get an approximate squared function with a  
 271 coefficient of  $\text{Cov}_0/(\rho^2)$ , which shows that the model is approximately invariant under changes of  $\text{Cov}_0$  and  
 272  $\rho^2$  that leave the ratio constant. This is the case in the two curves above. We don't get into the plateau of  
 273 the variogram, so can not fit  $\text{Cov}_0$  and  $\rho$  independently. We concluded that empirical variograms can not be  
 274 used for kernel length estimation in this particular context, and turned to different estimation approaches  
 275 below.

276 However, the variogram at least exposes an approach to estimate the variance  $\tau^2$  and nugget term  $\eta$  (as  
 277 in equation 2). First, from the form of the covariance function 3 we have  $\text{Cov}(0, 0) = \tau^2(1 + \eta)$ . At the same  
 278 time, for small but non-zero values of  $r$  and  $u$  we have  $\text{Cov}(r \rightarrow 0, u \rightarrow 0) = \tau^2$ . So for the semivariogram  
 279 we get:

$$V(r \rightarrow 0, u \rightarrow 0) = \text{Cov}(0, 0) - \text{Cov}(r \rightarrow 0, u \rightarrow 0) = \tau^2(1 + \eta) - \tau^2 = \tau^2\eta \tag{10}$$

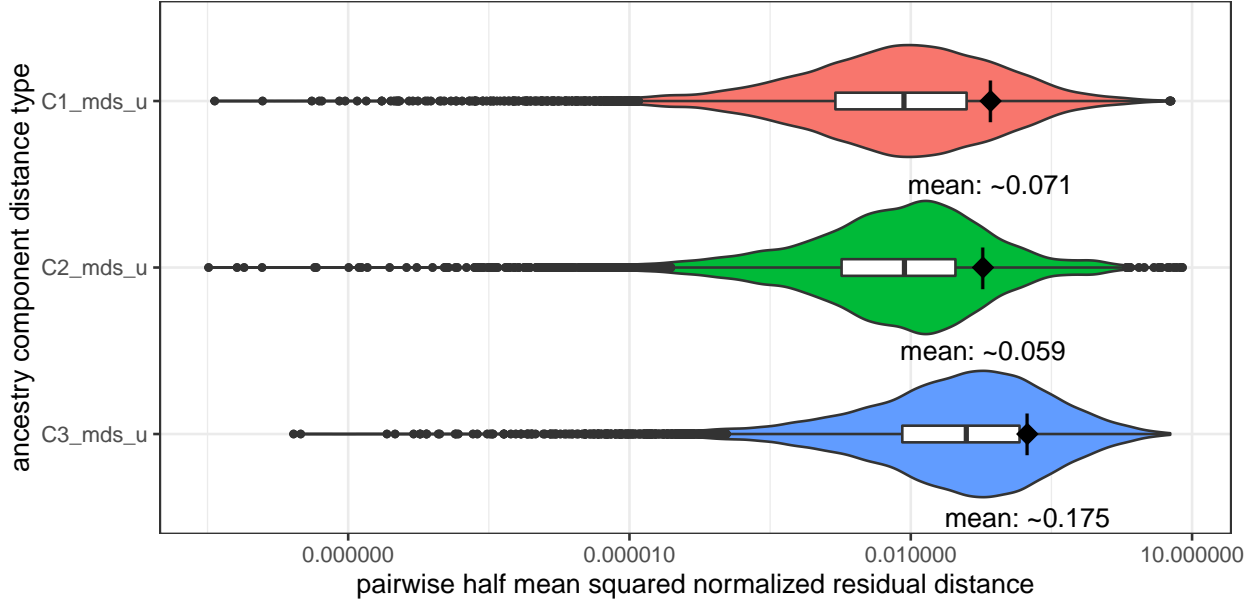

**Figure S21:** Violin- and boxplot of the detrended pairwise distance distribution for different ancestry components in a short and narrow temporal and spatial distance window ( $< 50\text{km}$  &  $< 50\text{years}$ ). The diamond shaped dot is positioned at the mean point of the distribution.

For the nugget term we have now an estimator

$$\hat{\eta} = \frac{V(r \rightarrow 0, u \rightarrow 0)}{\tau^2} \quad (11)$$

This can be readily derived, since the variance  $\tau^2$  can be estimated as the overall sample variance of the data, i.e.

$$\hat{\tau}^2 = \frac{1}{N} \sum_i (g_i - \bar{g})^2 \quad (12)$$

280 where  $N$  is the number of data points and  $\bar{g}$  is the mean genetic value.

281 Figure S21 shows the distribution of pairwise squared genetic distances for samples that are less than 50  
 282 years and 50 kilometres apart. Each distance value is scaled according to the estimator defined in equation 11  
 283 and the mean of these pairwise distances is a good default for the nugget term of a given ancestry component  
 284 (see also Figure S17 A). So these means are what we used for the nugget terms throughout the paper. Note  
 285 how the result for the third MDS output dimension is 2-3 times bigger than for the first two. This is certainly  
 286 a consequence of the low spatiotemporal correlation of this variable uncovered in Supp. Text 2.

## 287 2.2 Maximum likelihood estimation

288 As a second method for kernel-width estimation, we turn to maximization of the likelihood. The laGP package  
 289 [8] provides two different maximum likelihood estimation (MLE) algorithms for automatic kernel parameter  
 290 exploration in anisotropic spaces: `mleGPsep` and `jmleGPsep`. According to the manual, `mleGPsep` uses L-  
 291 BFGS-B optimization (a limited memory quasi-Newton approximation of the Broyden-Fletcher-Goldfarb-  
 292 Shanno algorithm) to get an estimate of  $\theta$  ( $\rho$  and  $\alpha$  above). It allows for joint estimation of  $\theta$  and the  
 293 nugget  $\eta$  with a common gradient. `jmleGPsep` on the other hand is explicitly designed for joint inference by

294 iterating over the marginals of  $\theta$  and  $\eta$ . laGP allows to set starting parameters and search boundaries for  
 295 both algorithms with the helper functions `darg` and `garg`. According to the manual, these "leverage crude  
 296 summary statistics" over the independent and dependent input variables to define sensible defaults.

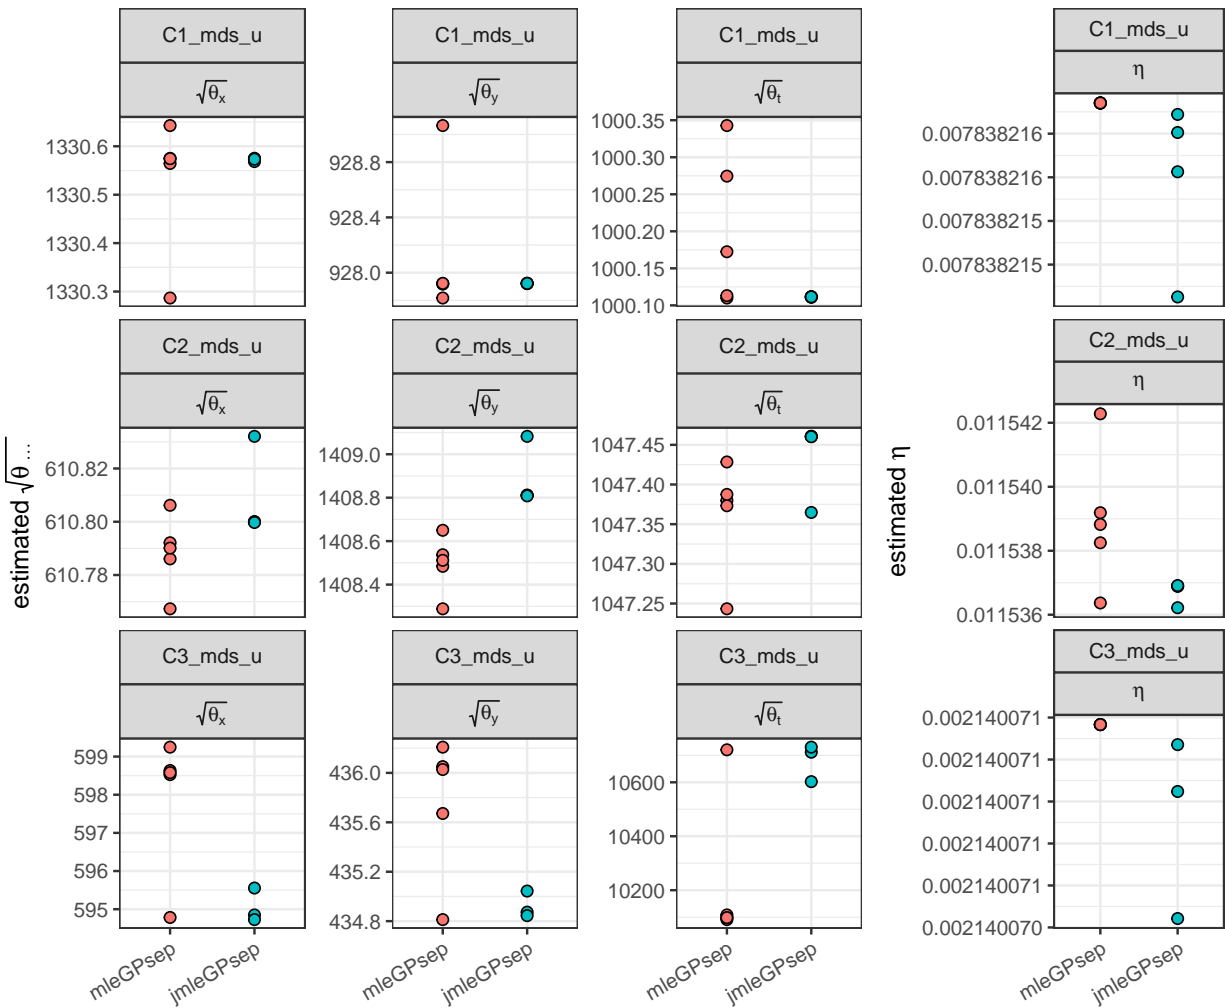

**Figure S22:** Results of the kernel parameter estimation with the laGP maximum likelihood algorithms `mleGPsep` and `jmleGPsep`. Each dot represents the result of one run for one parameter. For each permutation of algorithm and ancestry component 5 runs were calculated.

297 `mleGPsep` and `jmleGPsep` as implemented in laGP are generally not well suited for spatiotemporal data  
 298 without inherent latitudinal or longitudinal bias, as they optimize each input dimension separately: Instead  
 299 of one spatial kernel radius  $\theta_s$  and one temporal kernel radius  $\theta_t$ , they effectively yield two separate values  
 300 for  $\theta_s$ , one for the spatial x axis ( $\theta_x$ ), and one for the spatial y axis ( $\theta_y$ ). Despite this, we decided to apply  
 301 the algorithms here to get a first estimate for  $\theta$  and to test our previous conclusion concerning  $\eta$ .

302 Figure S22 shows the result of multiple runs for each combination of algorithm and ancestry component.  
 303 The estimated  $\theta$  values for the three dimensions are very similar between the two algorithms (`mleGPsep` and  
 304 `jmleGPsep`) but different for the three ancestry components modelled with the Gaussian process (C1, C2  
 305 and C3 in MDS space). Note that we report  $\sqrt{\theta}$  instead of  $\theta$ , since that has the more interpretable unit

306 (kilometres and years, respectively), see equation 2. The values for the first two MDS output dimensions  
 307 are relatively large, but seem at least generally plausible, given how far the influence of each point could  
 308 "radiate" in a squared exponential model and how far prehistoric interaction networks may have spanned  
 309 (see Figure S23 to get some intuition). This does not hold for the biased MDS dimension C3, where  $\sqrt{\theta_s}$  is  
 310 estimated to be about 20 times smaller than  $\sqrt{\theta_t}$ .

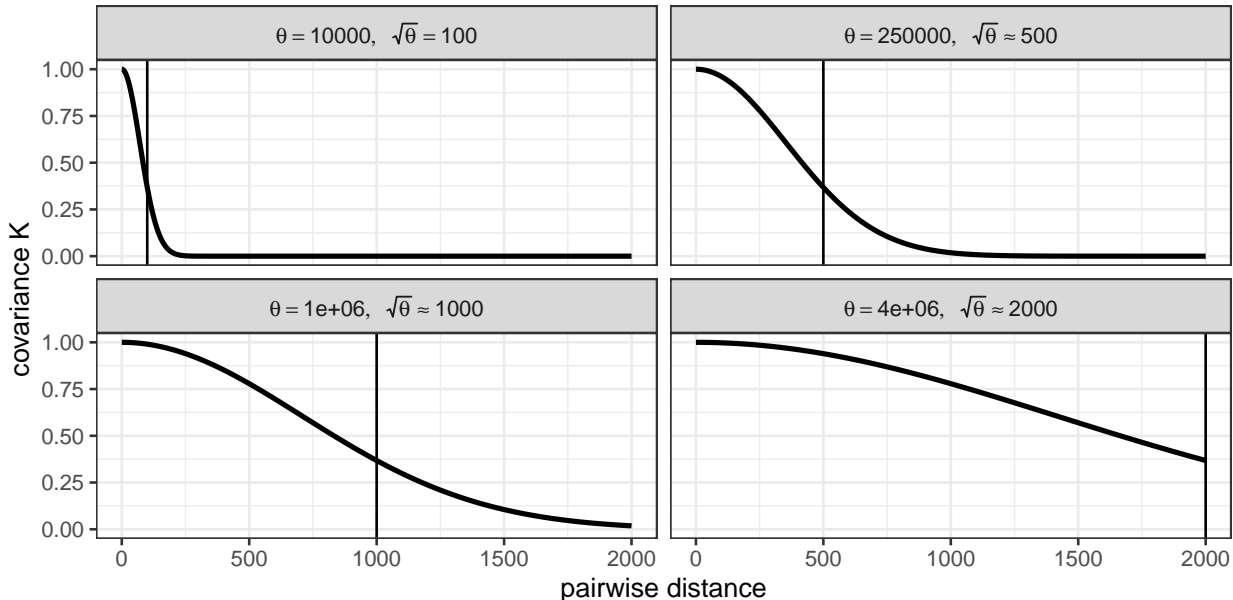

**Figure S23:** Example curves to illustrate the behaviour of a squared exponential function  $K_{ij} = \exp(\frac{-\|x_i - x_j\|^2}{\theta})$  with different values of  $\theta$ . The "pairwise distance" could for example be in kilometres or years.

311 One consistent observation across all three ancestry components considered here, is that  $\theta_x$  should be  
 312 different from  $\theta_y$  for an optimal model. So the above mentioned anisotropy issue does indeed affect the  
 313 outcome of the parameter estimation and poses a form of overfitting. We do not believe though that a model  
 314 with a latitude-longitude mismatch is justified in this context.

315 The estimated values for  $\eta$  are about one order of magnitude smaller than the ones estimated from the  
 316 variogram. We assume this to be an effect of the implausible anisotropy. Experimental interpolation test  
 317 runs with  $\eta < 0.04$  led to overfitting in settings with fixed  $\theta_x = \theta_y$  and we therefore decided to keep  $\eta$  as  
 318 decided above.

319 laGP also provides the function `mleGP` to estimate  $\theta$  and  $\eta$  in isotropic systems and we decided to employ  
 320 this algorithm as well. To account for the anisotropic nature of the space-time relationship we introduced a  
 321 scaling factor that manipulates the temporal axis. Starting from the default 1 (1km = 1y) we increased and  
 322 decreased the scaling factor in a rescaling sequence from 1/10 to 2. Figure S24 documents the result: `mleGP`  
 323 yields only one value for  $\theta$ , which reacts to the forced temporal "contraction" and "inflation". One way to  
 324 imagine this is a rigid sphere in a changing cuboid universe: We contract or inflate the cuboids z-axis and  
 325 estimate for each setting i) if a sphere is a good assumption for predicting observations (Figure S24 B) and  
 326 ii) which radius the sphere should ideally have (Figure S24 A). As stated above, we used fixed values for  $\eta$   
 327 here.

328 In the MDS setup shown here and for the spatiotemporally informative ancestry components C1 and

329 C2, increasing and decreasing the scaling factor, so temporal inflation and deflation, quickly deteriorates the  
 330 model likelihood. A scaling factor of 1, so  $\theta_t = \theta_s$  and  $1\text{km} = 1\text{y}$ , yields good results for both. The estimates  
 331 for the absolute values of  $\sqrt{\theta}$  are smaller, but on the same magnitude as for the anisotropic estimation above.  
 332 For C3 the algorithm does not detect a local optimum within the search space. Just as observed above with  
 333 the anisotropic mle algorithms, solutions with very small scaling factors, so massively contracted time and  
 334 therefore  $\theta_t \gg \theta_s$  are favoured for this component.

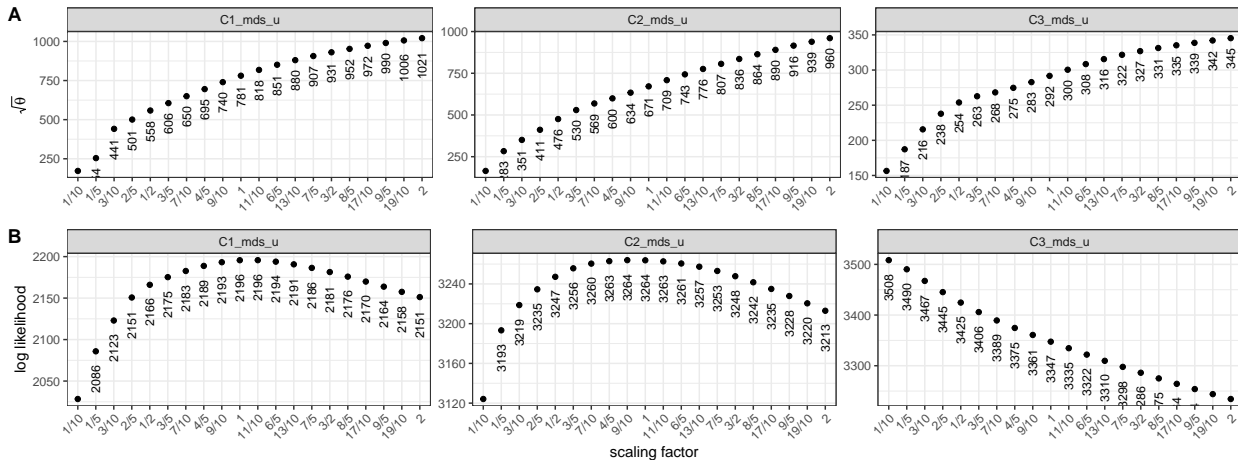

**Figure S24:** Results of `mleGP` exploration runs with variable scaling of temporal and geospatial space. `mleGP` assumes an isotropic system.

### 335 2.3 Crossvalidation

336 As a third and more independent method to estimate  $\theta$ , we turned towards a simple crossvalidation approach,  
 337 which allows to see the effect of different kernel size values on prediction accuracy and precision. We explored  
 338 a  $\theta$  grid with 15 values for the spatial kernel size  $\sqrt{\theta_s} = 100, 200, 300, \dots, 1300, 1400, 1500$  km and 15 values  
 339 for the temporal kernel size  $\sqrt{\theta_t} = 100, 200, 300, \dots, 1300, 1400, 1500$  years. The nugget term  $\eta$  was again  
 340 fixed as decided above. Our crossvalidation algorithm includes the following steps and was applied for each  
 341 ancestry component and  $\theta_s$  and  $\theta_t$  combination separately:

- 342 1. Randomly reorder the observations
- 343 2. Split the observations into 10 groups
- 344 3. Build a laGP GPR model from 9 of the 10 groups and use it to predict the 10th. Do this for all  
 345 combinations of groups
- 346 4. Calculate the distance between real and predicted value for each observation

347 As these steps are also repeated 10 times, this crossvalidation is computationally very expensive and was  
 348 calculated on a high performance computing cluster. The fast approximate GPR implementation in laGP  
 349 helped substantially to make this feasible.

350 Figure S25 shows the distributions of a large sample of normalized (to the range of the ancestry compo-  
 351 nents) distance values. As expected, the distances form a distribution around zero. Most predictions are in  
 352 a 10% margin around the observed ancestry data. That means that i) the GPR models are generally good

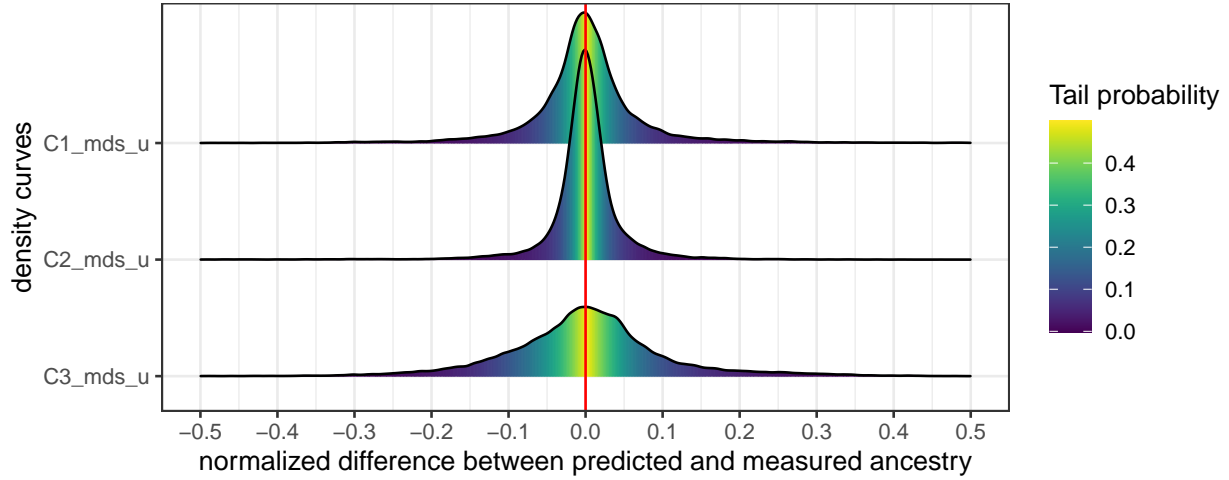

**Figure S25:** Distribution of 200,000 randomly drawn deviations out of all crossvalidation prediction-observation distances. The distance values were normalized to the total range of the respective ancestry component.

353 at predicting the ancestry of unknown observations and ii) there must exist multiple combinations of  $\theta_s$  and  
 354  $\theta_t$  that yield a solid GPR model.

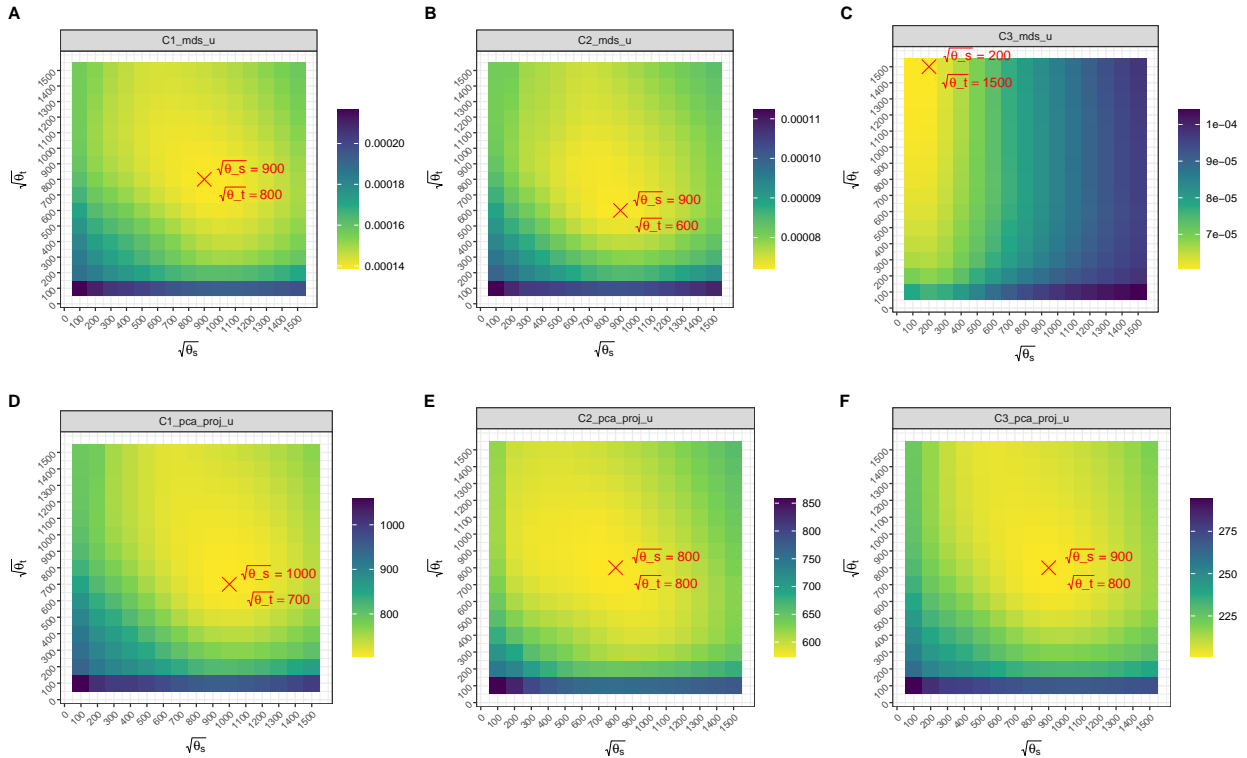

**Figure S26:** Crossvalidation results (mean squared differences between prediction and observation) of the first three ancestry components of MDS and projected PCA for different  $\theta_s$  and  $\theta_t$  combinations. The combinations of  $\theta_s$  and  $\theta_t$  with the best mean predictive power are highlighted in red.

355 The latter is confirmed when we look at the mean squared difference rasters in Figure S26 **A** and **B**.  
 356 Generally, good predictions are possible in a remarkably large corridor of  $\theta_s$  and  $\theta_t$  value permutations. The  
 357 red crosses in the plots mark the lengthscale parameter combination with the best predictive capabilities for  
 358 the respective ancestry component. The figure also includes the results for the third MDS dimension (**C**)  
 359 which shows how clearly it deviates in its spatiotemporal behaviour. The results for the first three dimensions  
 360 of the projected PCA (**D**, **E** and **F**) are added as well, to further illustrate what we already derived from  
 361 Figure S2 **D** and **E** in Supp. Text 1.

362 We conclude that large (multiple hundred kilometers and years) kernels with  $\theta_t \approx \theta_s$  have the best mean  
 363 postdictive power for the European spatiotemporal ancestry field given the amount and distribution of the  
 364 data and the ancestry components (MDS2, PCA5) considered for our study. This was already indicated by  
 365 maximum likelihood estimation with the laGP functions `mleGPsep` and `jmleGPsep`, and then confirmed by  
 366 a large scale crossvalidation. This crossvalidation yields robust and reproducible results and the analysis in  
 367 this paper therefore relies on the kernel settings estimated through it. See the following table for the most  
 368 important values used, or Figure S2 for a summary of all estimated parameters for each ancestry component.

| Multivariate method | Dimension | $\sqrt{\theta_x}$ | $\sqrt{\theta_y}$ | $\sqrt{\theta_t}$ | $\eta$    |
|---------------------|-----------|-------------------|-------------------|-------------------|-----------|
| MDS2                | C1        | 900               | 900               | 800               | 0.0710309 |
| MDS2                | C2        | 900               | 900               | 600               | 0.0589138 |
| PCA5                | C1        | 1000              | 1000              | 700               | 0.0790766 |
| PCA5                | C2        | 800               | 800               | 800               | 0.0806609 |
| PCA5                | C3        | 900               | 900               | 800               | 0.1412002 |
| PCA5                | C4        | 700               | 700               | 700               | 0.4677798 |
| PCA5                | C5        | 900               | 900               | 800               | 0.3623957 |

369 Beyond that we also experimented with smaller kernels and kernels with  $\theta_s \ll \theta_t$  and  $\theta_s \gg \theta_t$ . Above  
 370 results indicate that a rather large range of covariance functions may yield satisfying models, and for the  
 371 mobility estimation attempted here, smaller kernels may theoretically be more useful. They could produce  
 372 stronger and more sharply bounded signals for specific events of change. A kernel with a high  $\theta_s$  and  $\theta_t$   
 373 on the other hand may obscure phenomena of temporal change by smoothing them out and by artificially  
 374 attributing them an earlier starting and later end time. In the end, though, our experiments left us to believe  
 375 that the different plausible kernel choices yield rather similar patterns for the mobility estimation and we  
 376 focused on only one, numerically optimal setting.

### 3 Supplementary Text: The similarity search algorithm

The main question for this paper was to estimate and quantify genetic spatiotemporal similarity and therefore ancestry relocation through human mobility. We assume this can in principle be done because people carry their genetic ancestry profiles with them when they move. Mobility estimation requires i) a suitable dimension reduction for "ancestry", ii) a handle on the sparseness of genetic data and iii) an algorithm to derive a probabilistic measure of genetic similarity for individual samples through space and time, which considers aforementioned sparsity. We finally need iii), a method to assess the similarity space to quantify meaningful signals of possible mobility.

We deal with the first requirement with different multivariate methods, which assign every individual two or more principal components (see Supp. Text 1). For simplicity, in the following sections we will only assume a single principal component, called  $C$ . The second requirement can be solved by interpolation through Gaussian process regression, as implemented in the laGP R package [8]. With a suitable kernel (see Supp. Text 2), this yields an estimate of the genetic ancestry component  $C$  as a *smooth* function in space and time. "Smooth" here means that our function  $C$  is continuous and differentiable within the focus area and focus time. Our solutions for the third and fourth requirement will be explained below.

#### 3.1 Ancestry and sample-wise similarity fields

Consider a genetic component  $C$  as a function of a 2D spatial position  $x$  and  $y$  and time  $t$ . Then, our genetic component is a function  $C(x, y, t)$ , like for example a temperature "field". Keeping  $y$  and  $t$  fixed, along  $x$  the theoretical field and the samples from which it is derived may look like Figure S27 A. In this example, the genetic component  $C$  follows a gradient with lower values on the left side (say, "West") and higher values on the right side (say, "East"). Thanks to our probabilistic interpolation method, each point of our field has an uncertainty reflecting the heterogeneity and sparsity of observations around it, which we abbreviate  $\sigma(x, y, t)$ . In practice, we consider a finite number of positions for which we determine the interpolation mean  $C$  and variance  $\sigma$  (Figure S27 B).

Now, consider a focal archaeological sample  $S_{x,y,t}$  with ancestry component  $C_s$ , a measurement of the ancestry component at a given point in space and time (Figure S27 C). We can write down the conditional probability that our individual with ancestry  $C_s$  matches our ancestry field  $C$  at location  $(x, y, t)$  using the normal distribution (for brevity we hide  $t$ ):

$$p(C_s|x, y) = \mathcal{N}(C(x, y), \sigma(x, y)) = \frac{1}{\sigma(x, y)\sqrt{2\pi}} e^{-\frac{1}{2}\left(\frac{C_s - C(x, y)}{\sigma(x, y)}\right)^2}$$

From a Bayesian perspective, this is the conditional probability of observing data  $C_s$  under a model  $(x, y)$ , where "model" here simply refers to an unobserved similarity point. Such a conditional probability, where the data appears left and the model parameters right is a likelihood. We can flip this using Bayes' formula to obtain the posterior probability for  $(x, y)$  given data  $C_s$ , using a prior probability  $p(x, y)$ :

$$p(x, y|C_s) = \frac{p(C_s|x, y)p(x, y)}{Z(C_s)}$$

where  $Z$  simply is the normalization constant that makes this expression a valid probability over  $x, y$ :

$$Z(C_s) = \int_x \int_y p(x, y|C_s) dx dy$$



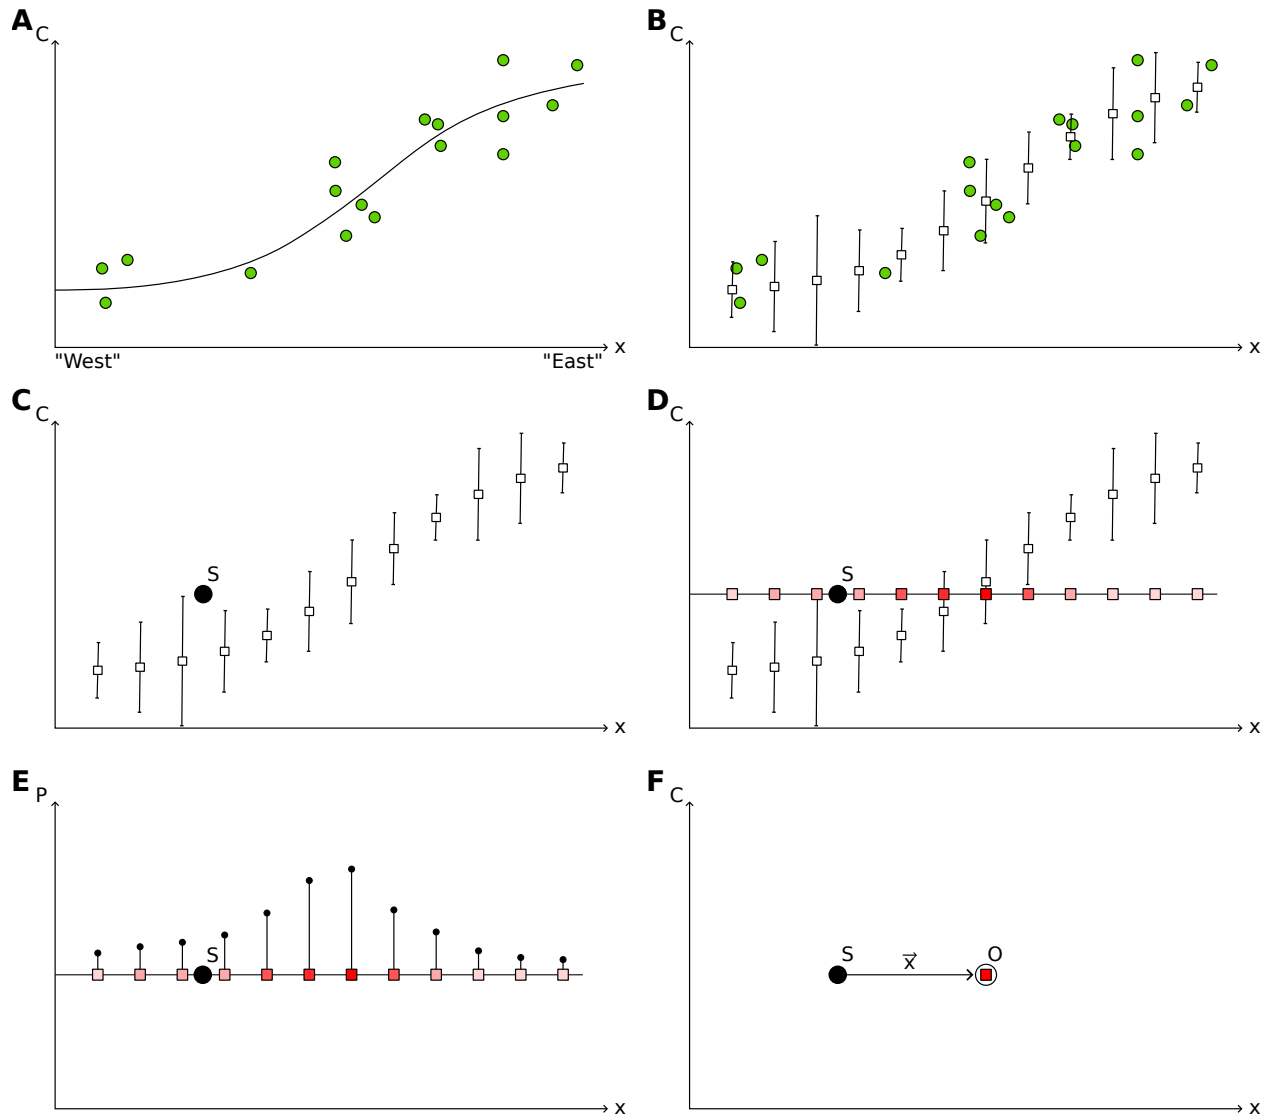

**Figure S27:** Schemata to explain the similarity search algorithm.

410 This leads to a posterior "similarity" probability for potentially any point in space, so a similarity  
 411 probability field. In our implementation the resolution of this field is limited by the regular, interpolated  
 412 search grid (Figure S27 **D & E**).

413 For real-world data this operation requires some further generalisation. Above we had a single component  
 414  $C(x, y)$ , but actually we have multiple, typically at least  $C_1(x, y)$  and  $C_2(x, y)$ . To combine the two, we  
 415 simply compute probabilities  $p_1(x, y|C_{s1})$  based on  $C_1(x, y)$  and the focal value  $C_{s1}$ , and  $p_2(x, y|C_{s2})$  based  
 416 on  $C_2(x, y)$  and the focal value  $C_{s2}$ . To get a combined similarity probability, we multiply the two and  
 417 normalise again.

418 Real world data is also not precisely positioned in space and – even more severely – time, e.g. through  
 419 uncertainties in absolute dating, where most input samples informing the interpolated field are either dated  
 420 with radiocarbon ages or through archaeological context information. For the former we can derive a complex  
 421 post-calibration radiocarbon probability distribution, for the latter at least a uniform probability distribution  
 422 from the potential start to the potential end point. One solution to consider this is through iterations of

423 random sampling, which leaves us with sampling iterations for  $C$  and thus  $p(x, y|C_s)$ . In this case a combined  
424 probability field could be calculated as the mean of the individual fields, but for our large-scale mobility  
425 proxy (see below) we in fact computed separate mobility vectors for each temporal resampling iteration.

### 426 3.2 Diachronic mobility proxy

427 For derived applications and as a simpler summary statistic we give special consideration to the maximum  
428 of the posterior probability at a given time before the age of a sample of interest, so the spatial position  
429 of maximum genetic similarity  $O_S$  in a past reconstructed similarity field (Figure S27 F). If we compute  
430  $C$  for a sample  $S_{x,y,t}$  not at the time  $t$ , but for a previous time step  $t - u$ , then  $O_S$  can be considered a  
431 measure of a likely point of "origin" for the ancestry profile of  $S$  at  $t - u$ . The vector  $\vec{x}_S^u$ , pointing from  $S$  to  
432  $O_S$  then becomes a measure of ancestry relocation through time, which is a proxy for mobility: If  $\Delta x \approx 0$ ,  
433 then no spatial mobility took place within the time  $u$ . For  $\Delta x \gg 0$  we can assume some relocation.  $u$  is  
434 a free parameter and we call it the retrospection distance. The vector with length  $\Delta x$  we call the mobility  
435 vector  $\vec{x}_S^u$ . It has both an informative length/magnitude and a direction. Many mobility vectors  $\vec{x}_{S_1}^u, \dots, \vec{x}_{S_n}^u$   
436 from samples  $S_1, \dots, S_n$  can be spatially and temporally binned to compute regional and diachronic mobility  
437 proxies.

### 438 3.3 Concrete steps for the mobility estimation

439 For the large-scale mobility estimation performed for this paper, we additionally considered different param-  
440 eter permutations. Please see the following summary of the concrete steps undertaken. The interpolation  
441 and similarity search behind other applications in the paper are considerably more simple and require fewer  
442 summary operations.

- 443 1. For each individual sample  $S(x, y, t)$  we interpolated the ancestry fields  $C_1(x, y, t - u), \dots, C_n(x, y, t - u)$ .  
444 This is done for the MDS output dimensions C1 and C2 and for Projection PCA C1-C5 (MDS2 & PCA5,  
445 see Supp. Text 1). The spatial target cell-size for the grid is set to 100km and for the retrospection  
446 distance  $u$  we iterate through three settings (see Supp. Text 5). The interpolation is repeated in 25  
447 temporal resampling iterations and we thus get a total of  $7 * 3 * 25 = 525$  permutations of the interpolated  
448 field.
- 449 2. We then calculate the respective 525 similarity probability fields  $p(x, y|C_s)$  for each sample.
- 450 3. The 2 or 5 probability fields of the individual ancestry components  $C_1, \dots, C_n$  (2 for MDS and 5 for  
451 PCA) are then multiplied respectively to derive  $2 * 3 * 25 = 150$  combined fields for each sample, 75  
452 for each multivariate method.
- 453 4. For each of these 150 fields and each sample we determine the point of maximum genetic similarity  $O_S$   
454 and the mobility vector  $\vec{x}_S^u$ .
- 455 5. This leaves us with 150 vectors for each sample. For each of the three retrospection distances  $u$  and  
456 both multivariate methods, we then combine the 25 temporal resampling iterations to visualize the  
457 sample-wise results in the mobility figures (Figure 5 and others) with the following operations:
  - 458 (a) The length of the mobility vectors as displayed on the y-axis of Figure 5 is calculated by averaging  
459 the 25 distances between sample location and estimated maximum similarity point for the spatial

460 dimensions  $x$  and  $y$  separately ( $\overline{O_x}$  and  $\overline{O_y}$ ), and then computing the average mobility distance  
461  $d = \sqrt{\overline{O_x^2} + \overline{O_y^2}}$ . This type of averaging corresponds to computing a vector-wise mean first,  
462 before computing its length.

463 (b) The error bars of the distances are computed as standard deviations of the lengths of the 25  
464 individual mobility vectors, in order to give an impression of their uncertainty.

465 (c) The angle displayed on the colour scale is given by  $\arctan(\overline{O_y}/\overline{O_x})$ .

466 6. The actual mobility curve, so the grey line and ribbon in the background of Figure 5 is a region-wise,  
467 diachronic summary statistic computed for an overlapping sequence of moving time-windows combining  
468 the sample-wise mobility vectors as follows:

469 (a) In a given region for every 400 year time window (one step every 50 years) we compute the  
470 length of the vector-wise average of the previously computed sample-wise mean mobility vectors.  
471 In Figure 5 this is shown as a grey line in the background.

472 (b) The grey ribbon around that line is defined as  $\pm 2$  times the standard error of the mean of the  
473 individual sample-wise distances in a given 400 year window.

474 **4 Supplementary Text: A toy simulation to demonstrate the sim-**  
 475 **ilarity search algorithm**

476 To explore the robustness of the search algorithm described in Supp. Text 3 we implemented a minimal  
 477 simulation study. For the sake of a minimum of complexity and to stay focused on a basic, key question,  
 478 we decided not to implement a spatiotemporal, agent-based model with artificial genomes or an equivalent  
 479 substitute, but to only consider the very derived proxy of a position along a genetic component like for  
 480 example the first MDS output coordinate. We specifically tried to answer the following question with a setup  
 481 that is as simple as possible both in structure and parameters: *How reliable is the spatial similarity search*  
 482 *given varying genetic between-area distances and how do basic context parameters affect it?*

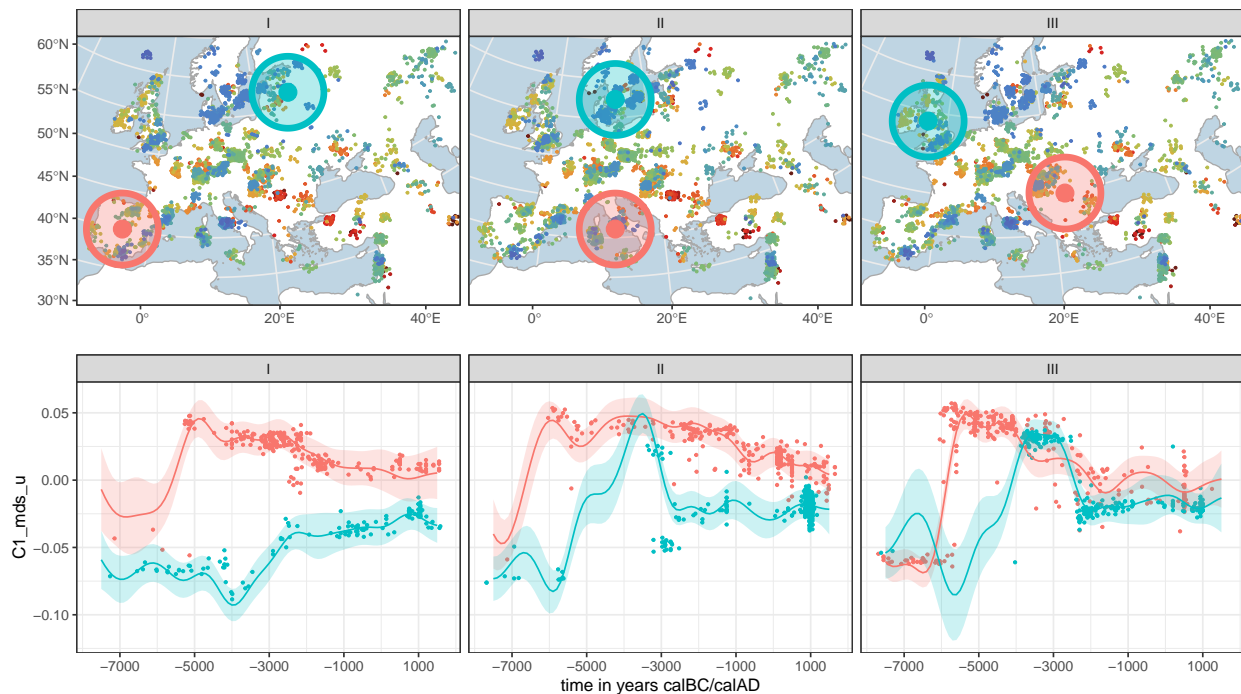

**Figure S28:** Real world examples of the development of C1\_mds\_u (see Supp. Text 1) through time for six European regions. The three maps on top show the (arbitrary) pairs plotted with a center point and a 500km radius. The bottom plots show C1\_mds\_u through time, with the individual dots representing samples from the respective 1000km circles. The smooth curves are the output of the default GPR interpolation established for this paper at the spatial center points of the regions. The ribbons around the curves cover one standard deviation. Note that the interpolation is also influenced by samples not in the 1000km circles and thus not plotted in the bottom plots.

483 To contextualize this question, it is helpful to consider some of the real world examples reconstructed  
 484 with the data and methodology established for this paper. Ideally a similarity search algorithm should be  
 485 able to distinguish a minimum of two areas independent of its genomic history through time. Figure S28  
 486 shows three pairs of regions and their respective developments along a genetic component C1\_mds\_u (from  
 487 now on only called C1) relevant for the analysis in this paper (see Supp. Text 1). The areas undergo different  
 488 population-level processes, that are indirectly represented by the rough proxy of individual samples on C1.  
 489 The area-pair in Example I expresses a funnel-like pattern, where the genetic profiles of Iberia and the  
 490 Eastern Baltic Sea region gradually get more similar over time. Example II contrasts the relative stability

491 of C1 for Italy since the Neolithic with the rapid changes Southern Scandinavia passes through in the third  
 492 millennium BC. In Example III, Great Britain and Ireland show a generally similar development as the  
 493 Balkans, but lag behind on the Early Neolithic population shift (here disregarding the extreme sparsity of  
 494 pre-Neolithic observations).

495 We generally assume, that our similarity search algorithm is capable of distinguishing spatial origins,  
 496 when the spatial distribution of specific genetic components is well accentuated. It should have no problem  
 497 to attribute samples to either Iberia or the Baltics in the fourth millennium BC. It is less certain, though,  
 498 how accurate the search would be in case of a higher degree of similarity, like for example between Britain  
 499 and the Balkans from the fourth millennium onward (only considering C1!).

## 500 4.1 Simulation setup

501 For the simulation we assume a world with two spatial  $(x, y)$  and one temporal dimension  $(z)$ . Each of these  
 502 three dimensions scales between 0 and 1 and the space is fully homogeneous and featureless. Within this  
 503 world, observations ("samples") are randomly distributed following a uniform distribution through space  
 504 and time. The sample size is a variable parameter of this setup to later measure the effect of sample sparsity.  
 505 One quarter of the spatial square landscape passes through a different genetic development as the rest (see  
 506 Figure S29), which puts it more or less apart through time. As an analogy to the real-world C1\_mds\_u, the  
 507 genetic component is represented by a numeric value roughly scaling between 0 and 1.

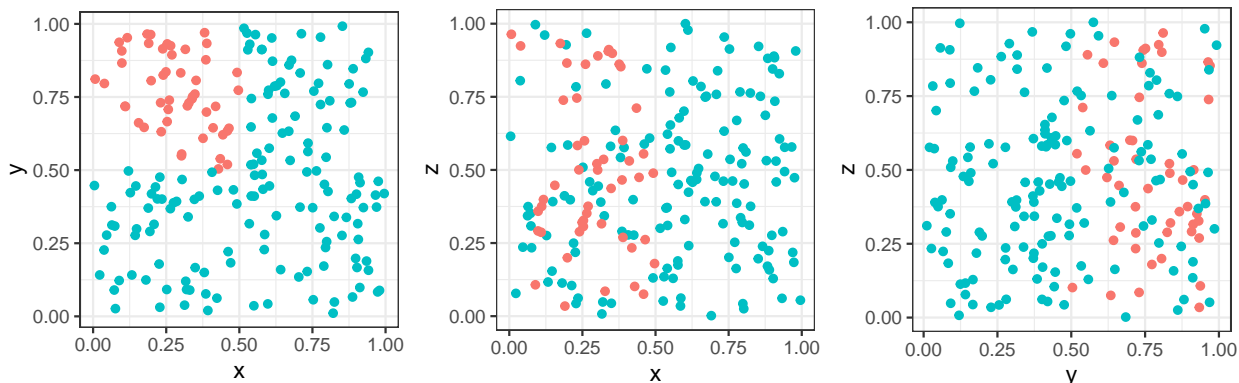

**Figure S29:** One iteration of the simulated sample distribution with  $4 \times 50 = 200$  samples. The three plots show the spatiotemporal 3D cube world from different perspectives, so the first plot can be understood as a spatial map. The colors serve to distinguish the two focal areas with divergent genetic developments.

508 For the population-wise development of this ancestry proxy we consider three scenarios, that are inspired  
 509 by the real-world observations in Figure S28: A scenario *linear*, where the two spatial areas are genetically  
 510 different at the beginning (so at  $z = 0$ ), but become more similar over time in a process of linear growth,  
 511 a scenario *limited* with the same outset, but a faster synchronization through limited growth (reaching  
 512 almost full identity at  $z = 1$ ), and finally a scenario *intertwined*, where the similarity in ancestry increases  
 513 in an oscillating pattern (Figure S30 A). Each sample  $S_{x,y,z}$  gets a genetic component  $C$  according to these  
 514 time-dependent scenarios. The "simulated" observation is sampled from a normal distribution with a fixed  
 515 standard deviation of 0.1 and whose mean is defined by the respective scenario.

$$C(S_{x,y,z}) \sim \mathcal{N}(\text{scenario}(z), 0.1)$$

516 We rerun this whole system across the three different scenarios (*linear*, *limited* and *intertwined*), three  
 517 different sample sizes ( $4 \times 10 = 40$ ,  $4 \times 50 = 200$  and  $4 \times 100 = 400$ ) and 100 resampling iterations, where  
 518 both the spatiotemporal positions and the genetic values of the samples vary according to the aforementioned  
 519 priors.

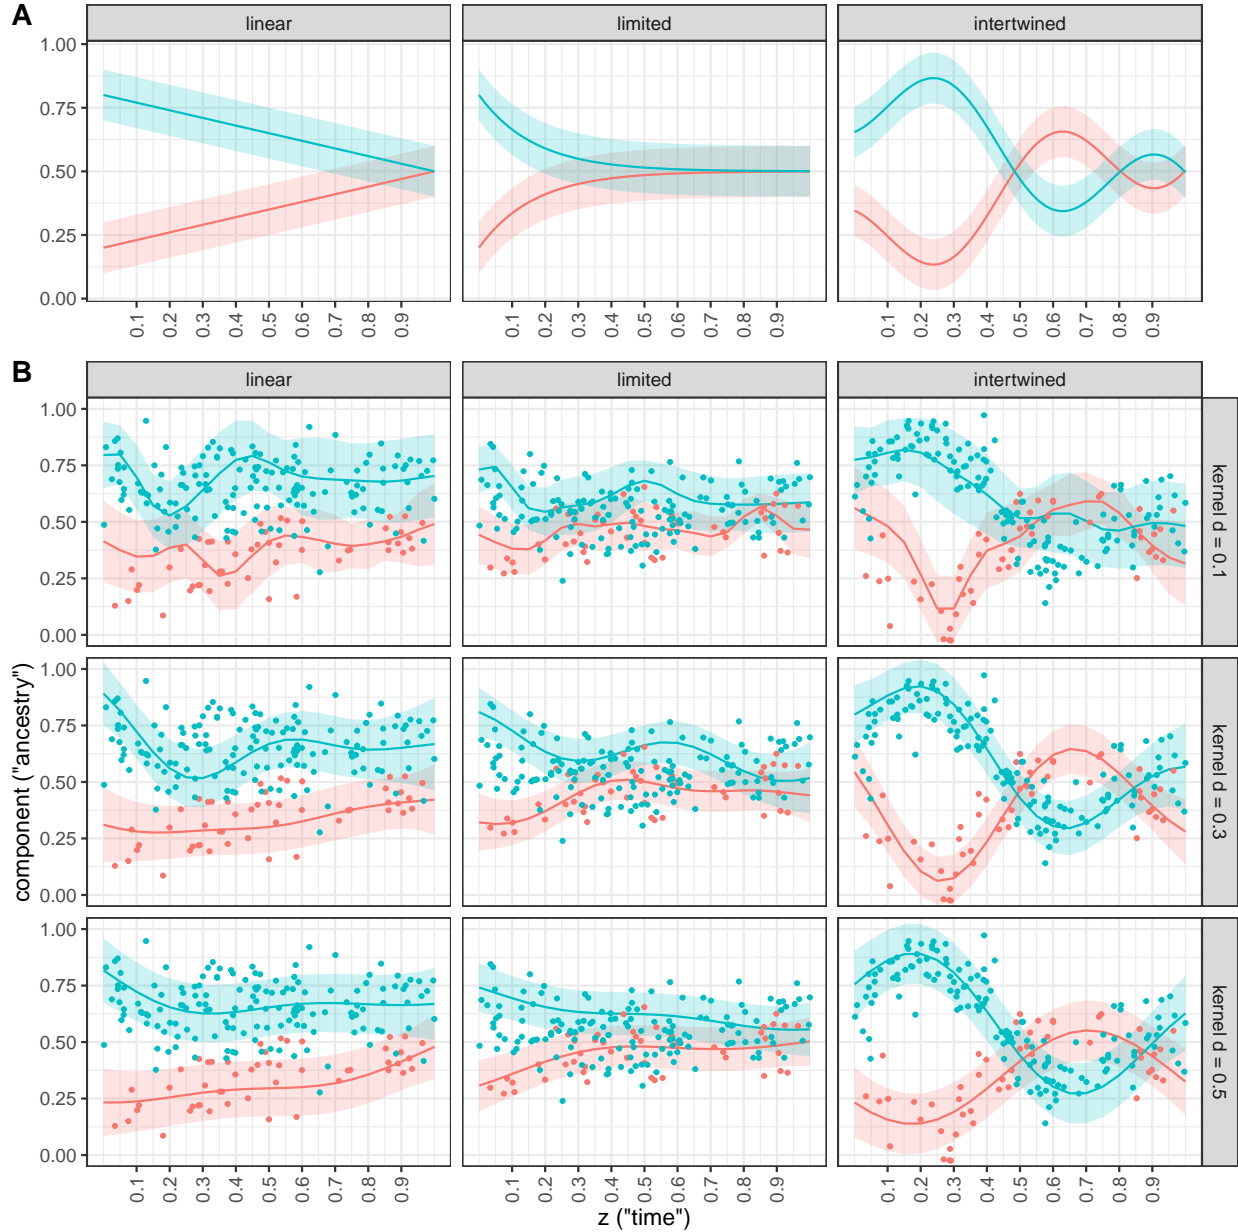

**Figure S30:** "Genetic" development through time for the artificial simulation scenarios. **A** shows the three theoretical models, **B** randomly sampled iterations of these scenarios with  $4 \times 50 = 200$  samples. The fitted curves are created via the GPR interpolation (just as in Figure S28) at the spatial positions  $[0.25, 0.75]$  and  $[0.75, 0.25]$ . The ribbons show one standard deviation of the field.

## 520 4.2 Interpolation

521 Figure S30 **B** shows one resampling iteration for the sample size  $4 \times 50 = 200$ . The randomly drawn points  
522 behave according to the input scenarios on the x-axis of the plot matrix. There are three times more blue  
523 points as there are red points following the spatial setup introduced above (Figure S29), so the red point  
524 cloud is naturally more sparse.

525 To get a better understanding of the Gaussian process regression algorithm employed in this paper and  
526 to evaluate how well the reconstructed ancestry field captures the respective input scenarios for the pseudo-  
527 "genetic" component in this simulation, we ran the interpolation for two spatial points within the red and  
528 the blue area through time and projected mean and standard deviation on to the respective point clouds in  
529 Figure S30 **B**. The positions of these points are  $[0.25, 0.75]$  for the red area and  $[0.75, 0.25]$  for the larger blue  
530 one (see Figure S29 for reference). So the fairly irregular curves we see in the plot only represent one central  
531 point within the distinguished areas and are fully dependent on the noisy samples informing the field around  
532 them through time. They do not capture the input scenarios perfectly and are accurate only to the degree  
533 the interpolated field does so at this one spatial position. Besides the available input samples, the quality  
534 of this reconstruction also depends to on the parameters set for the field, namely the characteristics of the  
535 covariance function (kernel). Here we set the nugget term to  $\eta = 0.1$  (considering the deviation we set for  
536 the sampling process generating this artificial data) and varied the lengthscale parameter in three different  
537 permutations (equal for both spatial and the temporal dimension).

538 Unsurprisingly we observe that smaller kernels yield more irregular, larger ones more smooth curves, but  
539 generally the field succeeds in reconstructing the broad strokes of the input scenarios.

## 540 4.3 Similarity search

541 As explained in Supp. Text 3, our similarity search relies on the interpolation of ancestry components and  
542 the search for points of maximum similarity in time slices of the "genetic" field. To measure the accuracy  
543 of the similarity search algorithm in the described simulation setup we constructed the following test: We  
544 assume a search sample  $S_z$  with one (!) genetic component

$$C(S_z) = \text{scenario}(z)$$

545 for a sequence of  $z = 0.1, 0.2, \dots, 0.9$ . We omitted  $x$  and  $y$  here, because they are without effect for the  
546 similarity search in this application (they would only matter if we were to assign a similarity vector), but  
547 for the sake of tangibility we imagine this sample to represent an individual who left the red area and is  
548 now found among the blue samples at  $[0.75, 0.25]$ . We now use the similarity search to determine the point  
549 of highest, interpolated similarity of the field in the same time slices  $z$ , given the different system parameter  
550 permutations.

551 Figure S31 shows one run of this experiment for a sample size of  $4 \times 50 = 200$ , a kernel size of  $d = 0.3$   
552 and one arbitrary resampling iteration. For each ancestry scenario nine subplots show the search outcomes  
553 for different time slices. The orange dot indicates the maximum similarity point, so the derived result of the  
554 search. Ideally we want this point to be always in the top left quarter of the search map: If it is there, then  
555 the search yielded an accurate result. Despite the fact we are only considering a single ancestry component  
556 here, for the *linear* scenario this is mostly the case through time, although the light blue areas of the  
557 similarity probability rasters show how the distinction of the red and blue areas slowly fall apart later on  
558 (see e.g. the field for  $z = 0.9$ ), as the two populations become less well distinguished by ancestry  $C$ . This

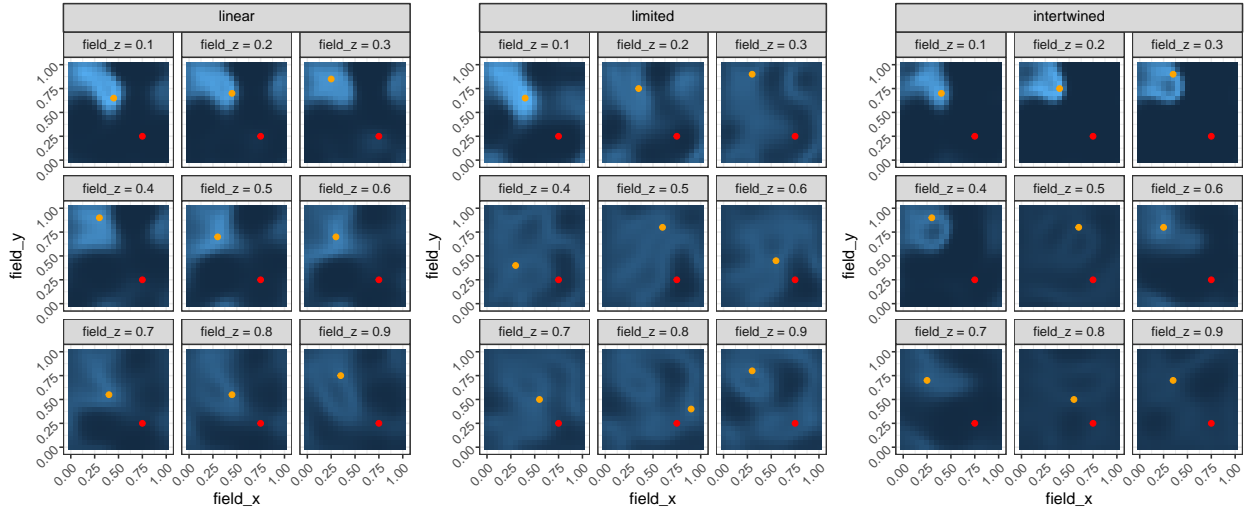

**Figure S31:** One iteration of the simulated similarity search through time for the three different simulated scenarios. Each search time slice ( $\text{field}_z$ ) is reflected by one subplot in a matrix of nine plots for each scenario. The blue raster maps in the background of each of these plots show the similarity probability for each pixel, with dark blue representing lower and light blue higher probabilities. The maximum likelihood point is indicated with an orange dot. The red dot marks the (in fact irrelevant) position of the search sample in the imaginary scenario underlying this figure.

559 process of deterioration is quicker and more severe for the more challenging scenario *limited*. Here, the correct  
 560 attribution fails already for  $z = 0.4$ , with a high potential similarity probability almost everywhere in the  
 561 square simulation world. For the more complex scenario *intertwined*, finally, the similarity search reflects the  
 562 volatile development of the ancestry component (see Figure S30 **A**): For  $z \leq 0.4$  the model is well able to  
 563 distinguish the areas, for  $z = 0.5$  it fails, for  $z = 0.6$  &  $z = 0.7$  it works again to then finally fall apart for  
 564  $z \geq 0.8$ .

565 The example in Figure S31 is informative, but as a single iteration not conclusive on the behaviour of the  
 566 search in the above established simulation setup. For that we have to consider more parameter permutations  
 567 and a representative number of resampling iterations. Figure S32 summarises runs across three different  
 568 samples sizes, three different ancestry scenarios and three different interpolation kernel sizes. Each of these  
 569 combinations is resampled 100 times. For all  $3 * 3 * 3 * 100 = 2700$  permutations we run the similarity search  
 570 for the nine time slices and check for each of them, if the result point is within the spatial top left ("red")  
 571 quadrant of the simulation world. If this is the case, we count this run towards the *number of "correct"*  
 572 *maximum similarity attributions* as plotted on the y-axis, of Figure S31. If this number reaches 100, so  
 573 includes every single one of the resampling iterations, then the search algorithm managed to detect the  
 574 correct origin area in 100% of the random spatiotemporal sample distributions. If this proxy goes down to  
 575 25, then it does not perform better than a random coordinate generator, which would place approximately  
 576 25 of 100 runs in the correct quarter of the simulation world.

577 A closer look at this figure reveals a number of important observations: The three different ancestry  
 578 scenarios yield vastly different results. *linear* is simple and keeps the two areas apart just until the very  
 579 end. Irrespective of sample- or kernel size the similarity search accuracy is high. It is slightly lower, though,  
 580 at the end of the time sequence (so when the two areas are becoming more similar, see Figure S30), if  
 581 either the sample or the kernel size is too small. For the *limited* scenario the observed accuracy is much



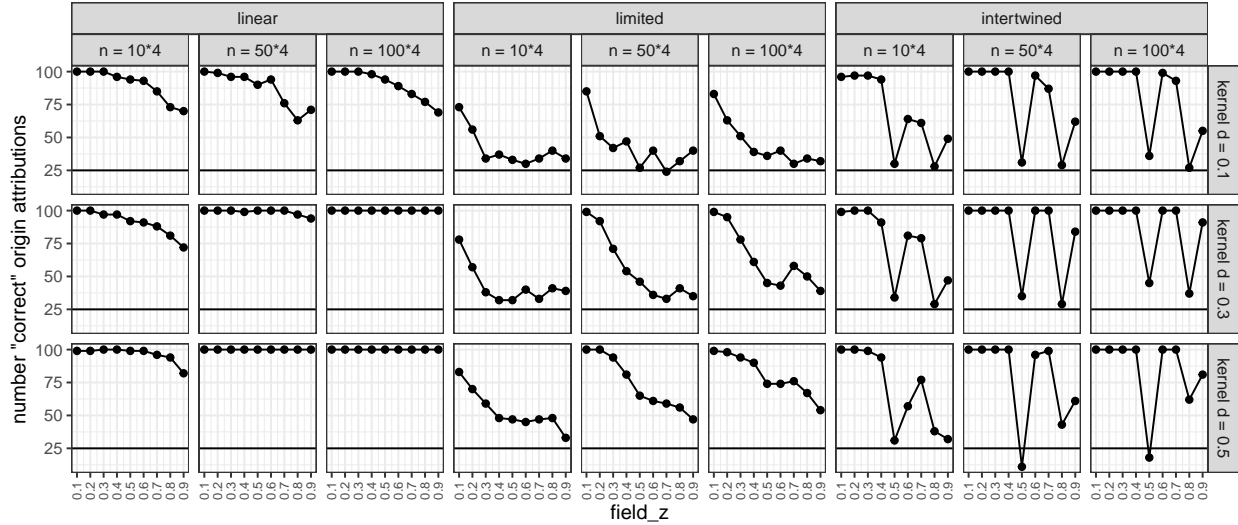

**Figure S32:** Results of the permutation analysis for similarity search accuracy given different parameter settings. Each of the 27 subplots for one of the three scenarios, one of the three population sizes and one of the three kernel sizes, summarises 900 runs of the search in the artificial simulation setup: 100 for each of the 9 time slices. The time slices are distinguished on the x-axis, and the y-axis thus encodes how many of the 100 searches per slice yielded an accurate search result. The horizontal line at  $y = 25$  is the random-attribution baseline, which hints at a fully failing similarity search if undercut.

582 lower. Especially for very low sample sizes a distinction of the two source areas is barely possible for later  
 583 time slices. Increasing the kernel size helps to smooth out sampling gaps and keeps the accuracy above the  
 584 random-threshold. The *intertwined* scenario highlights how quickly the similarity search can fall apart, but  
 585 also recover again in case of opposing and overlapping genetic developments for the two focal areas. It fails  
 586 dramatically for  $z = 0.5$  no matter the model parameter settings.

#### 587 4.4 Conclusion

588 The purpose of this simulation exercise was to get a better understanding the robustness of the similarity  
 589 search algorithm in different scenarios. From our analysis we conclude, that said robustness is high and  
 590 should generally be suitable for real-world data on the orders of magnitude relevant for this paper. There  
 591 are, of course scenarios, where the algorithm fails to yield meaningful output. These are notably significant  
 592 bi-directional genetic turnover, so when two regions swap their genetic make-up, and extensive cross-regional  
 593 synchronization. The former can be considered unlikely or at least rare, but the latter is a defining property  
 594 of the Western Eurasian archaeogenetic record for various regions after the Bronze Age, which happens to  
 595 be a focal research context for this study.

596 We considered this setup in the artificial *limited* scenario of this simulation and learned that large sample  
 597 sizes and large kernel sizes improve the accuracy of the search considerably. Larger kernels allow the past  
 598 to inform the present, which is a reasonably safe default for the similarity search application. For the large  
 599 scale mobility estimation attempted in this study, we even emphasised this effect through the introduction  
 600 of the retrospection distance parameter.

601 We finally highlight two more features of our similarity search algorithm that mitigate undesired effects:  
 602 1.) By picking not just one, but two or more ancestry components, we render it less likely that two regions

603 become fully similar in their ancestry profile. Two or more dimensions are less likely to be spuriously similar.  
604 2.) Our algorithm is probabilistic, and reveals for each sample a probability distribution through space, which  
605 captures the full uncertainty of our search. So in cases of ambiguity, we expect the probability distribution  
606 to reflect this ambiguity and make it transparent to a user of our method.

## 5 Supplementary Text: Mobility curve exploration

### 5.1 Two additional regions: Southeastern Europe and Western Pontic Steppe

For conciseness we decided to only discuss four mobility analysis regions in the main text: Britain and Ireland, Central Europe, Iberia and Italy. We ran the mobility estimation for all samples, though, and defined two additional regions to be considered here now: Southeastern Europe and the Western Pontic Steppe (see Figure S10).

Southeastern Europe stands out in our analysis, because we could include a high number of comparatively early samples from the Mesolithic, e.g. M96 [11]. All of them are from the small and extraordinary Iron Gates area in Serbia and Romania, where the Danube passes between the Balkan Mountains and the Southern Carpathian Mountains range. During the 6th millennium BC, correlating well with the beginning of the Neolithisation in the region [12], we observe the emergence of non-locality signals: The ancestry profile of Early Neolithic individuals like e.g. I3948 [13] from the Adriatic coast points to Western Anatolia. Surprisingly, for the individual I2534 [13, 14], we observe a long mobility vector to the North, even after the onset of the Neolithic. This individual might not necessarily have been (personally or through their immediate ancestors) part of any permanent long-range mobility: they lived at a time and place where new ancestry was arriving with the Neolithic package – rapidly changing the local ancestry landscape – and their genetic “displacement” thus becomes an indirect proxy of the major mobility event surrounding them. The unexpected peak with northwestern direction in the 5th millennium is carried by chalcolithic individuals from Bulgaria (all from ref. [13]), whose mobility vectors point to Central Europe. Unlike other European regions, the arrival of Steppe ancestry in Southeastern Europe is more gradual, beginning earlier and less abruptly [13]. Few individuals show a clear mobility signal pointing to the far Northeast – e.g. I4175 [13]. For later periods, finally, we observe some remarkable outliers with strong mobility signals: For example the Hungarian Bell Beaker I2787 [15], the Iron Age Scythian DA197 [16] or the Migration Period Hunnic individual HUN001 [17].

Even further to the East, in the Western Pontic steppe (including the area north of the Greater Caucasus mountain range), we see a quite varied account of ancestry influx. For the Ukrainian samples from the sixth millennium and before, Mathieson et al. 2018 [13] report ancestry on a cline between Eastern-, Scandinavian Mesolithic- and later Western Hunter-Gatherers. This genetic affinity is reflected in the first increase of signal we observe mainly from the Northwest during the sixth millennium, confirming previously described similarities in the developments in Eastern and Northeastern Europe [18]. Only at the beginning of the fifth millennium one extraordinary individual (I3719) stands out with “entirely northwestern-Anatolian-Neolithic-related ancestry” [13] and thus long-distance affinity to the West and Southwest. Most data for the Neolithic and the Bronze Age is from the Caucasus region and documents a complex, though relatively local mobility history [19]. Within this time frame, multiple Globular Amphora context individuals (e.g. ILK003 [13]) from present-day Ukraine show a strong mobility signal from the West. During the Iron Age, more individuals with a relatively long-distance mobility signal appear, for example cim359 [20] and MJ-13 [21]. Their mobility vectors point to the opposite ends of Europe, possibly illustrating the region’s position as a bridge between Europe and Central Eurasia, housing different equestrian steppe nomad populations – e.g. Cimmerians, Scythians, and Sarmatians. This generally holds true into historical times, including the Migration- [16] and Medieval Periods (e.g. VK542 [5]).

## 647 5.2 Comparing different mobility curves

648 The mobility estimation presented in this paper depends on a large number of parameters. For many of them  
 649 there is no naturally optimal choice, so we had to make multiple intuitive or empirically informed decisions.  
 650 Supp. Text 1 explains how we selected the simplified genetic space to interpolate for our ancestry field and  
 651 how we settled on a 2D MDS and a 5D projection-based PCA. Supp. Text 2 explains how we determined  
 652 the parameters for the Gaussian process regression interpolation. As explained in Supp. Text 3, another key  
 653 parameter arises from the retrospection distance that should be used for the similarity search algorithm in  
 654 our large scale mobility estimation.

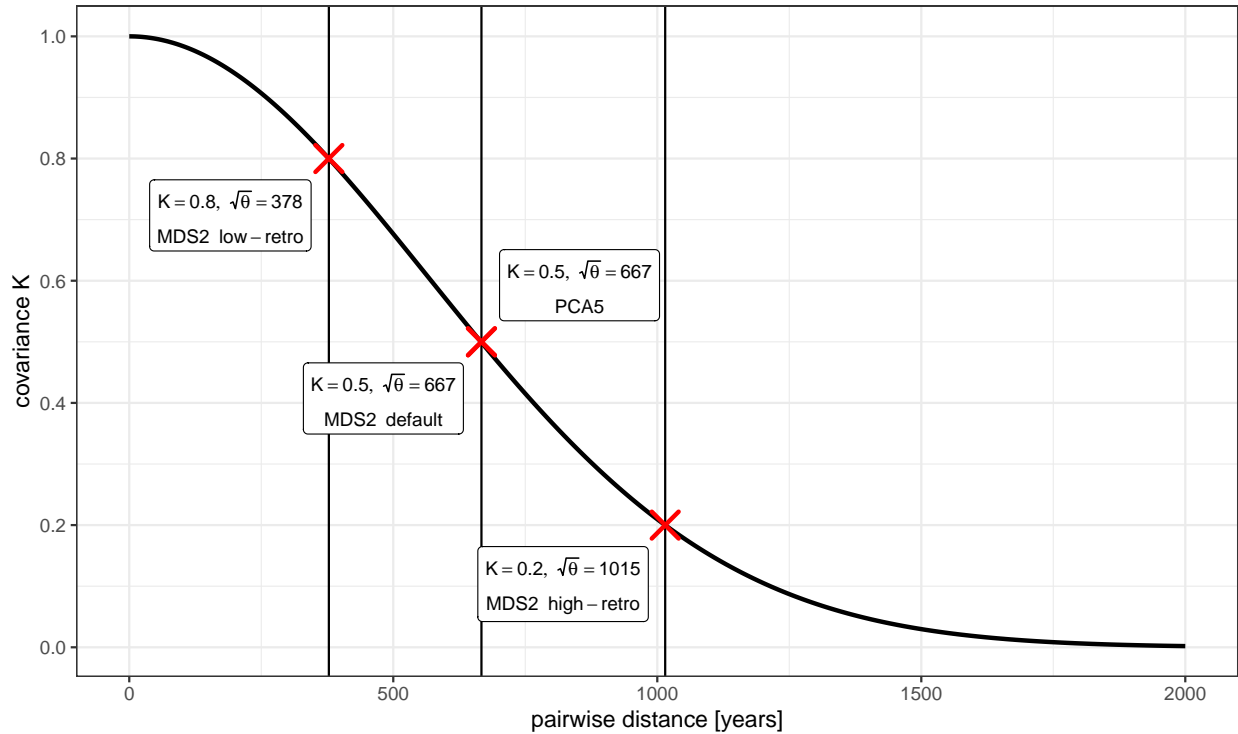

**Figure S33:** Retrospection distance settings for the different runs.

655 Figure S33 shows that we eventually decided to consider three values for the retrospection distance,  
 656 informed by an assumed temporal kernel size of  $\sqrt{\theta_t} = 800$ : An intermediate one based on the point of  
 657  $Cov(x, x') = 0.5$  (*default*), a low one at  $Cov(x, x') = 0.8$  (*low*) and a high one at  $Cov(x, x') = 0.2$  (*high*).  
 658 For each of these settings we reran the mobility estimation and produced the curve plots Figure S10, S12  
 659 and S13. An additional version in Figure S11 shows the PCA5 result, again with the *default* retrospection  
 660 distance. Figure S34 is finally an attempt to visualise the major differences between these iterations.

661 The curves for all three experimental settings (Figure S11, S12, S13) are generally similar to the default  
 662 (S10). The main peaks and depressions generally overlap and seem to be detected robustly. A number of  
 663 differences emerge, though: A lower retrospection distance generally causes shorter mean mobility vectors,  
 664 whereas a higher one causes the peak similarity to be further away. This is a strong signal, but not surprising:  
 665 It is plausible that the further one goes back in time, the further away ones ancestors might have lived  
 666 originally. Especially the main long-distance events during the Early and Late Neolithic get exaggerated by  
 667 this effect (see e.g. the timeseries for the Stuttgart sample in Figure S7) and only few contexts and individuals

668 seem to deviate from this general pattern entirely.

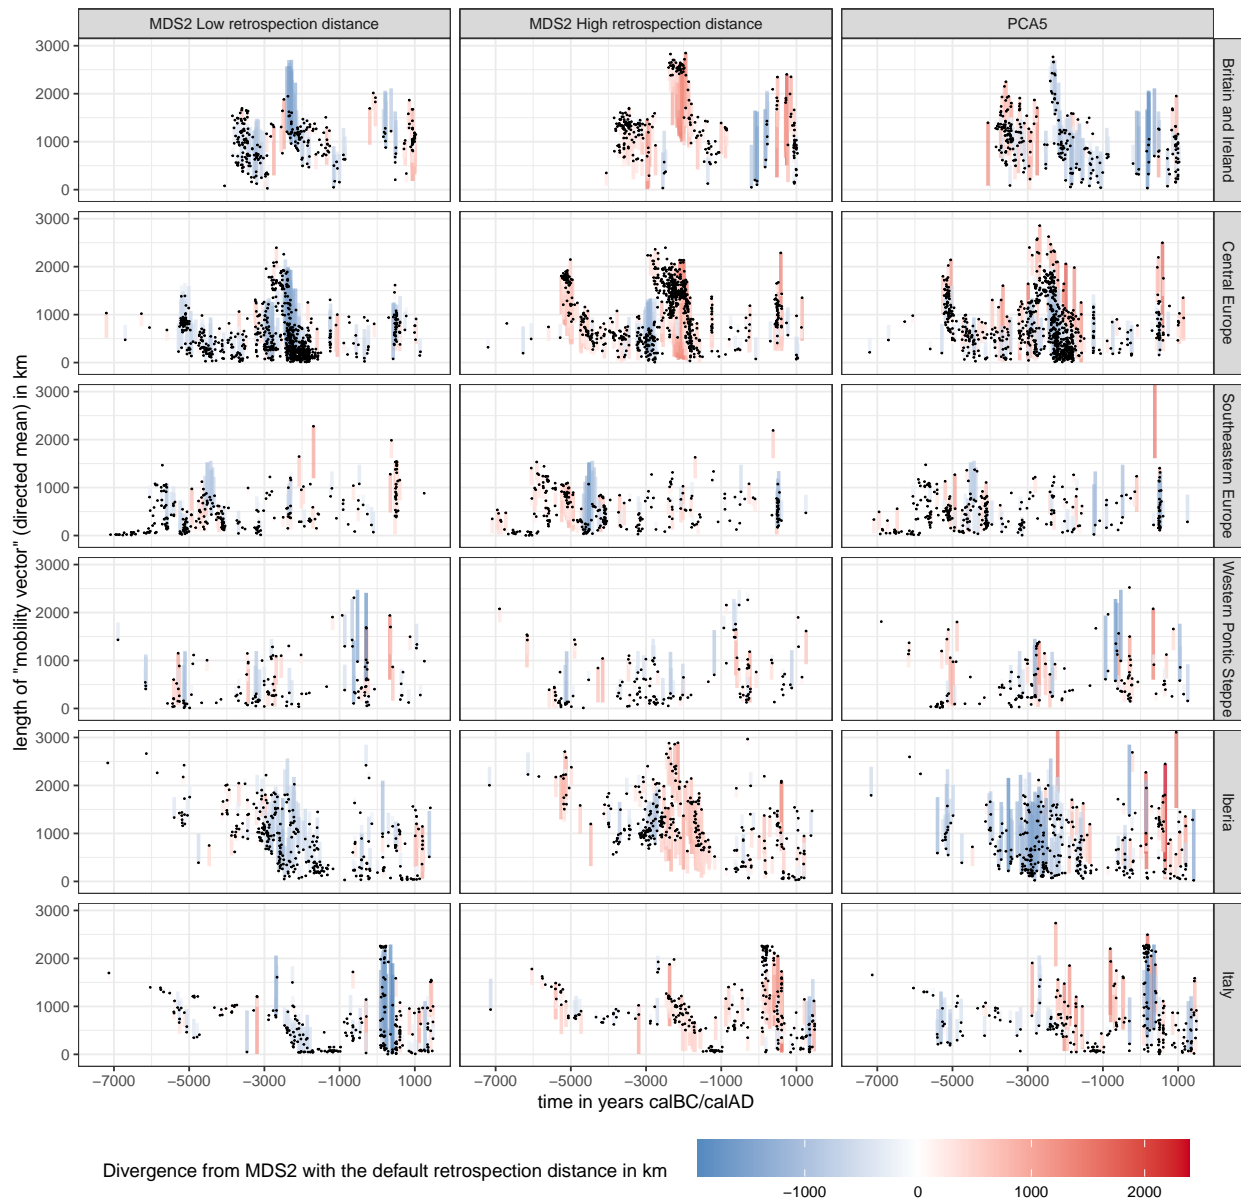

**Figure S34:** Comparison of different mobility estimation runs in a plot matrix. Each row of the plot matrix covers one analysis region, each column one of the three additional run configurations. The dots show the length of the summarized mobility vectors of one sample, just as in Figure 5. Vertical lines connect the results for the given run and the MDS2 run with default retrospection distance as in Figure 5 and Figure S10. The diverging colour scheme of these lines highlight when, where and to which degree the runs yield different mean mobility vector lengths.

669 The difference between the MDS2 and the PCA5 run are less systematic. For various regions and time  
 670 periods, e.g. Britain and Ireland before 3000BC, Central Europe in the Late Neolithic and the Early Bronze  
 671 Age, Iberia after AD and Italy between 2500 and 500BC, the PCA5-based search finds some markedly longer  
 672 vectors. For Britain and Ireland after 3000BC and most notably Iberia before 2500BC the opposite is the  
 673 case. A look at the outlier or peak-mobility individuals highlighted in the main text and above points towards

674 more conservative estimates for the PCA5 run: Outliers in the MDS2 run with default retrospection distance  
675 usually also emerge as outliers when the retrospection distance is modified, but often don't with PCA5. This  
676 applies especially for individuals from the Western Pontic Steppe, Iberia and Italy.

## C Bibliography: Supplementary Texts

- [1] Ludovic Orlando et al. “Ancient DNA analysis”. In: *Nature Reviews Methods Primers* 1.1 (Feb. 2021). DOI: 10.1038/s43586-020-00011-0.
- [2] Shaun Purcell et al. “PLINK: a tool set for whole-genome association and population-based linkage analyses”. In: *Am. J. Hum. Genet.* 81.3 (Sept. 2007), pp. 559–575.
- [3] Salvador Herrando-Pérez, Raymond Tobler, and Christian D. Huber. “smartsnp, an R package for fast multivariate analyses of big genomic data”. In: *Methods in Ecology and Evolution* 12.11 (Aug. 2021), pp. 2084–2093. DOI: 10.1111/2041-210x.13684.
- [4] Jonas Meisner et al. “Large-scale inference of population structure in presence of missingness using PCA”. In: *Bioinformatics* 37.13 (Jan. 2021), pp. 1868–1875. DOI: 10.1093/bioinformatics/btab027.
- [5] Ashot Margaryan et al. “Population genomics of the Viking world”. In: *Nature* 585.7825 (Sept. 2020), pp. 390–396. DOI: 10.1038/s41586-020-2688-8.
- [6] Alkes L. Price et al. “Long-Range LD can confound genome scans in admixed populations”. In: *The American Journal of Human Genetics* 83.1 (2008), pp. 132–135. DOI: 10.1016/j.ajhg.2008.06.005.
- [7] Carl A Anderson et al. “Data quality control in genetic case-control association studies”. In: *Nat. Protoc.* 5.9 (Aug. 2010), pp. 1564–1573. DOI: 10.1038/nprot.2010.116.
- [8] Robert B. Gramacy. “laGP: Large-scale spatial modeling via Local Approximate Gaussian Processes in R”. In: *Journal of Statistical Software* 72.1 (2016), pp. 1–46. DOI: 10.18637/jss.v072.i01.
- [9] Fernando Racimo et al. “The spatiotemporal spread of human migrations during the European Holocene”. In: *Proc. Natl. Acad. Sci. U. S. A.* 117.16 (Apr. 2020), pp. 8989–9000. DOI: 10.1073/pnas.1920051117.
- [10] S Banerjee, B P Carlin, and A E Gelfand. *Hierarchical modeling and analysis for spatial data. 2nd Edition*. Boca Raton, FL: CRC Press, 2015.
- [11] Gloria González-Fortes et al. “Paleogenomic Evidence for Multi-generational Mixing between Neolithic Farmers and Mesolithic Hunter-Gatherers in the Lower Danube Basin”. In: *Current Biology* 27.12 (June 2017), 1801–1810.e10. DOI: 10.1016/j.cub.2017.05.023.
- [12] Marko Porčić et al. “The timing and tempo of the Neolithic expansion across the Central Balkans in the light of the new radiocarbon evidence”. In: *Journal of Archaeological Science: Reports* 33 (Oct. 2020), p. 102528. DOI: 10.1016/j.jasrep.2020.102528.
- [13] Iain Mathieson et al. “The genomic history of Southeastern Europe”. In: *Nature* 555.7695 (Mar. 2018), pp. 197–203. DOI: 10.1038/nature25778.
- [14] Mark Lipson et al. “Parallel palaeogenomic transects reveal complex genetic history of early European farmers”. In: *Nature* 551.7680 (Nov. 2017), pp. 368–372. DOI: 10.1038/nature24476.
- [15] Iñigo Olalde et al. “The Beaker phenomenon and the genomic transformation of Northwest Europe”. In: *Nature* 555.7695 (Mar. 2018), pp. 190–196. DOI: 10.1038/nature25738.
- [16] Peter de Barros Damgaard et al. “137 ancient human genomes from across the Eurasian steppes”. In: *Nature* 557.7705 (May 2018), pp. 369–374. DOI: 10.1038/s41586-018-0094-2.

- 714 [17] Guido Alberto Gneccchi-Rusccone et al. “Ancient genomic time transect from the Central Asian Steppe  
715 unravels the history of the Scythians”. In: *Science Advances* 7.13 (Mar. 2021), eabe4414. DOI: 10.  
716 1126/sciadv.abe4414.
- 717 [18] Eppie R Jones et al. “The Neolithic transition in the Baltic was not driven by admixture with early  
718 European farmers”. en. In: *Curr. Biol.* 27.4 (Feb. 2017), pp. 576–582. DOI: 10.1016/j.cub.2016.12.  
719 060.
- 720 [19] Chuan-Chao Wang et al. “Ancient human genome-wide data from a 3000-year interval in the Caucasus  
721 corresponds with eco-geographic regions”. In: *Nat. Commun.* 10.1 (Feb. 2019), p. 590. DOI: 10.1038/  
722 s41467-018-08220-8.
- 723 [20] Maja Krzewińska et al. “Ancient genomes suggest the eastern Pontic-Caspian steppe as the source of  
724 western Iron Age nomads”. In: *Science Advances* 4.10 (Oct. 2018), eaat4457. DOI: 10.1126/sciadv.  
725 aat4457.
- 726 [21] Mari Järve et al. “Shifts in the genetic landscape of the Western Eurasian steppe associated with the  
727 beginning and end of the Scythian dominance”. In: *Curr. Biol.* 29.14 (July 2019), 2430–2441.e10. DOI:  
728 10.1016/j.cub.2019.06.019.



## D Bibliography: AADR Dataset

- [1] Cristina Gamba et al. “Genome flux and stasis in a five millennium transect of European prehistory”. In: *Nat Commun* 5.1 (Oct. 2014). DOI: 10.1038/ncomms6257.
- [2] Iñigo Olalde et al. “Derived immune and ancestral pigmentation alleles in a 7,000-year-old Mesolithic European”. In: *Nature* 507.7491 (Jan. 2014), pp. 225–228. DOI: 10.1038/nature12960.
- [3] Iosif Lazaridis et al. “Ancient human genomes suggest three ancestral populations for present-day Europeans”. In: *Nature* 513.7518 (Sept. 2014), pp. 409–413. DOI: 10.1038/nature13673.
- [4] Pontus Skoglund et al. “Genomic Diversity and Admixture Differs for Stone-Age Scandinavian Foragers and Farmers”. In: *Science* 344.6185 (May 2014), pp. 747–750. DOI: 10.1126/science.1253448.
- [5] Eppie R. Jones et al. “Upper Palaeolithic genomes reveal deep roots of modern Eurasians”. In: *Nat Commun* 6.1 (Nov. 2015). DOI: 10.1038/ncomms9912.
- [6] Iñigo Olalde et al. “A Common Genetic Origin for Early Farmers from Mediterranean Cardial and Central European LBK Cultures”. In: *Mol Biol Evol* (Sept. 2015), msv181. DOI: 10.1093/molbev/msv181.
- [7] Iain Mathieson et al. “Genome-wide patterns of selection in 230 ancient Eurasians”. In: *Nature* 528.7583 (Nov. 2015), pp. 499–503. DOI: 10.1038/nature16152.
- [8] Lara M. Cassidy et al. “Neolithic and Bronze Age migration to Ireland and establishment of the insular Atlantic genome”. In: *Proc. Natl. Acad. Sci. U.S.A.* 113.2 (Dec. 2015), pp. 368–373. DOI: 10.1073/pnas.1518445113.
- [9] Morten E. Allentoft et al. “Population genomics of Bronze Age Eurasia”. In: *Nature* 522.7555 (June 2015), pp. 167–172. DOI: 10.1038/nature14507.
- [10] Torsten Günther et al. “Ancient genomes link early farmers from Atapuerca in Spain to modern-day Basques”. In: *Proc. Natl. Acad. Sci. U.S.A.* 112.38 (Sept. 2015), pp. 11917–11922. DOI: 10.1073/pnas.1509851112.
- [11] Wolfgang Haak et al. “Massive migration from the steppe was a source for Indo-European languages in Europe”. In: *Nature* 522.7555 (Mar. 2015), pp. 207–211. DOI: 10.1038/nature14317.
- [12] Ayça Omrak et al. “Genomic Evidence Establishes Anatolia as the Source of the European Neolithic Gene Pool”. In: *Current Biology* 26.2 (Jan. 2016), pp. 270–275. DOI: 10.1016/j.cub.2015.12.019.
- [13] Farnaz Broushaki et al. “Early Neolithic genomes from the eastern Fertile Crescent”. In: *Science* 353.6298 (July 2016), pp. 499–503. DOI: 10.1126/science.aaf7943.
- [14] Gülşah Merve Kılınç et al. “The Demographic Development of the First Farmers in Anatolia”. In: *Current Biology* 26.19 (Oct. 2016), pp. 2659–2666. DOI: 10.1016/j.cub.2016.07.057.
- [15] Iosif Lazaridis et al. “Genomic insights into the origin of farming in the ancient Near East”. In: *Nature* 536.7617 (July 2016), pp. 419–424. DOI: 10.1038/nature19310.
- [16] Qiaomei Fu et al. “The genetic history of Ice Age Europe”. In: *Nature* 534.7606 (May 2016), pp. 200–205. DOI: 10.1038/nature17993.
- [17] Rui Martiniano et al. “Genomic signals of migration and continuity in Britain before the Anglo-Saxons”. In: *Nat Commun* 7.1 (Jan. 2016). DOI: 10.1038/ncomms10326.

- 767 [18] Stephan Schiffels et al. “Iron Age and Anglo-Saxon genomes from East England reveal British migration  
768 history”. In: *Nat Commun* 7.1 (Jan. 2016). DOI: 10.1038/ncomms10408.
- 769 [19] Zuzana Hofmanová et al. “Early farmers from across Europe directly descended from Neolithic Aegeans”.  
770 In: *Proc. Natl. Acad. Sci. U.S.A.* 113.25 (June 2016), pp. 6886–6891. DOI: 10.1073/pnas.1523951113.
- 771 [20] Edwin C. M. van den Brink et al. “A Late Bronze Age II clay coffin from Tel Shaddud in the Central  
772 Jezreel Valley, Israel: context and historical implications”. In: *Levant* 49.2 (May 2017), pp. 105–135.  
773 DOI: 10.1080/00758914.2017.1368204.
- 774 [21] Eppie R. Jones et al. “The Neolithic Transition in the Baltic Was Not Driven by Admixture with Early  
775 European Farmers”. In: *Current Biology* 27.4 (Feb. 2017), pp. 576–582. DOI: 10.1016/j.cub.2016.  
776 12.060.
- 777 [22] Gloria González-Fortes et al. “Paleogenomic Evidence for Multi-generational Mixing between Neolithic  
778 Farmers and Mesolithic Hunter-Gatherers in the Lower Danube Basin”. In: *Current Biology* 27.12 (June  
779 2017), 1801–1810.e10. DOI: 10.1016/j.cub.2017.05.023.
- 780 [23] Iosif Lazaridis et al. “Genetic origins of the Minoans and Mycenaeans”. In: *Nature* 548.7666 (Aug.  
781 2017), pp. 214–218. DOI: 10.1038/nature23310.
- 782 [24] Lehti Saag et al. “Extensive Farming in Estonia Started through a Sex-Biased Migration from the  
783 Steppe”. In: *Current Biology* 27.14 (July 2017), 2185–2193.e6. DOI: 10.1016/j.cub.2017.06.022.
- 784 [25] Marc Haber et al. “Continuity and Admixture in the Last Five Millennia of Levantine History from An-  
785 cient Canaanite and Present-Day Lebanese Genome Sequences”. In: *The American Journal of Human*  
786 *Genetics* 101.2 (Aug. 2017), pp. 274–282. DOI: 10.1016/j.ajhg.2017.06.013.
- 787 [26] Mark Lipson et al. “Parallel palaeogenomic transects reveal complex genetic history of early European  
788 farmers”. In: *Nature* 551.7680 (Nov. 2017), pp. 368–372. DOI: 10.1038/nature24476.
- 789 [27] Martin Sikora et al. “Ancient genomes show social and reproductive behavior of early Upper Paleolithic  
790 foragers”. In: *Science* 358.6363 (Oct. 2017), pp. 659–662. DOI: 10.1126/science.aao1807.
- 791 [28] Martina Unterländer et al. “Ancestry and demography and descendants of Iron Age nomads of the  
792 Eurasian Steppe”. In: *Nat Commun* 8.1 (Mar. 2017). DOI: 10.1038/ncomms14615.
- 793 [29] Rui Martiniano et al. “The population genomics of archaeological transition in west Iberia: Investigation  
794 of ancient substructure using imputation and haplotype-based methods”. In: *PLoS Genet* 13.7 (July  
795 2017). Ed. by Anna Di Rienzo, e1006852. DOI: 10.1371/journal.pgen.1006852.
- 796 [30] Verena J. Schuenemann et al. “Ancient Egyptian mummy genomes suggest an increase of Sub-Saharan  
797 African ancestry in post-Roman periods”. In: *Nat Commun* 8.1 (May 2017). DOI: 10.1038/ncomms15694.
- 798 [31] Éadaoin Harney et al. “Ancient DNA from Chalcolithic Israel reveals the role of population mixture  
799 in cultural transformation”. In: *Nat Commun* 9.1 (Aug. 2018). DOI: 10.1038/s41467-018-05649-9.
- 800 [32] Alissa Mittnik et al. “The genetic prehistory of the Baltic Sea region”. In: *Nat Commun* 9.1 (Jan.  
801 2018). DOI: 10.1038/s41467-018-02825-9.
- 802 [33] Carlos Eduardo G. Amorim et al. “Understanding 6th-century barbarian social organization and migra-  
803 tion through paleogenomics”. In: *Nat Commun* 9.1 (Sept. 2018). DOI: 10.1038/s41467-018-06024-4.
- 804 [34] Cristina Valdiosera et al. “Four millennia of Iberian biomolecular prehistory illustrate the impact of  
805 prehistoric migrations at the far end of Eurasia”. In: *Proc. Natl. Acad. Sci. U.S.A.* 115.13 (Mar. 2018),  
806 pp. 3428–3433. DOI: 10.1073/pnas.1717762115.

- 807 [35] D. M. Fernandes et al. “A genomic Neolithic time transect of hunter-farmer admixture in central  
808 Poland”. In: *Sci Rep* 8.1 (Oct. 2018). DOI: 10.1038/s41598-018-33067-w.
- 809 [36] Iñigo Olalde et al. “The Beaker phenomenon and the genomic transformation of northwest Europe”.  
810 In: *Nature* 555.7695 (Feb. 2018), pp. 190–196. DOI: 10.1038/nature25738.
- 811 [37] Iain Mathieson et al. “The genomic history of southeastern Europe”. In: *Nature* 555.7695 (Feb. 2018),  
812 pp. 197–203. DOI: 10.1038/nature25778.
- 813 [38] Krishna R. Veeramah et al. “Population genomic analysis of elongated skulls reveals extensive female-  
814 biased immigration in Early Medieval Bavaria”. In: *Proc. Natl. Acad. Sci. U.S.A.* 115.13 (Mar. 2018),  
815 pp. 3494–3499. DOI: 10.1073/pnas.1719880115.
- 816 [39] Maja Krzewińska et al. “Genomic and Strontium Isotope Variation Reveal Immigration Patterns in  
817 a Viking Age Town”. In: *Current Biology* 28.17 (Sept. 2018), 2730–2738.e10. DOI: 10.1016/j.cub.  
818 2018.06.053.
- 819 [40] Maja Krzewińska et al. “Ancient genomes suggest the eastern Pontic-Caspian steppe as the source of  
820 western Iron Age nomads”. In: *Sci. Adv.* 4.10 (Oct. 2018). DOI: 10.1126/sciadv.aat4457.
- 821 [41] Niall O’Sullivan et al. “Ancient genome-wide analyses infer kinship structure in an Early Medieval  
822 Alemannic graveyard”. In: *Sci. Adv.* 4.9 (Sept. 2018). DOI: 10.1126/sciadv.aao1262.
- 823 [42] Peter de Barros Damgaard et al. “137 ancient human genomes from across the Eurasian steppes”. In:  
824 *Nature* 557.7705 (May 2018), pp. 369–374. DOI: 10.1038/s41586-018-0094-2.
- 825 [43] Peter de Barros Damgaard et al. “The first horse herders and the impact of early Bronze Age steppe  
826 expansions into Asia”. In: *Science* 360.6396 (June 2018). DOI: 10.1126/science.aar7711.
- 827 [44] Pierre Zalloua et al. “Ancient DNA of Phoenician remains indicates discontinuity in the settlement  
828 history of Ibiza”. In: *Sci Rep* 8.1 (Dec. 2018). DOI: 10.1038/s41598-018-35667-y.
- 829 [45] Thiseas C. Lamnidis et al. “Ancient Fennoscandian genomes reveal origin and spread of Siberian  
830 ancestry in Europe”. In: *Nat Commun* 9.1 (Nov. 2018). DOI: 10.1038/s41467-018-07483-5.
- 831 [46] Torsten Günther et al. “Population genomics of Mesolithic Scandinavia: Investigating early postglacial  
832 migration routes and high-latitude adaptation”. In: *PLoS Biol* 16.1 (Jan. 2018). Ed. by Nick Barton,  
833 e2003703. DOI: 10.1371/journal.pbio.2003703.
- 834 [47] Alissa Mittnik et al. “Kinship-based social inequality in Bronze Age Europe”. In: *Science* 366.6466  
835 (Nov. 2019), pp. 731–734. DOI: 10.1126/science.aax6219.
- 836 [48] Christiana L. Scheib et al. “East Anglian early Neolithic monument burial linked to contemporary  
837 Megaliths”. In: *Annals of Human Biology* 46.2 (Feb. 2019), pp. 145–149. DOI: 10.1080/03014460.  
838 2019.1623912.
- 839 [49] Chuan-Chao Wang et al. “Ancient human genome-wide data from a 3000-year interval in the Caucasus  
840 corresponds with eco-geographic regions”. In: *Nat Commun* 10.1 (Feb. 2019). DOI: 10.1038/s41467-  
841 018-08220-8.
- 842 [50] Federico Sánchez-Quinto et al. “Megalithic tombs in western and northern Neolithic Europe were  
843 linked to a kindred society”. In: *Proc. Natl. Acad. Sci. U.S.A.* 116.19 (Apr. 2019), pp. 9469–9474. DOI:  
844 10.1073/pnas.1818037116.
- 845 [51] G. González-Fortes et al. “A western route of prehistoric human migration from Africa into the Iberian  
846 Peninsula”. In: *Proc. R. Soc. B.* 286.1895 (Jan. 2019), p. 20182288. DOI: 10.1098/rspb.2018.2288.

- 847 [52] Hannes Schroeder et al. “Unraveling ancestry, kinship, and violence in a Late Neolithic mass grave”. In:  
848 *Proc. Natl. Acad. Sci. U.S.A.* 116.22 (May 2019), pp. 10705–10710. DOI: 10.1073/pnas.1820210116.
- 849 [53] Helena Malmström et al. “The genomic ancestry of the Scandinavian Battle Axe Culture people  
850 and their relation to the broader Corded Ware horizon”. In: *Proc. R. Soc. B.* 286.1912 (Oct. 2019),  
851 p. 20191528. DOI: 10.1098/rspb.2019.1528.
- 852 [54] Iñigo Olalde et al. “The genomic history of the Iberian Peninsula over the past 8000 years”. In: *Science*  
853 363.6432 (Mar. 2019), pp. 1230–1234. DOI: 10.1126/science.aav4040.
- 854 [55] Lehti Saag et al. “The Arrival of Siberian Ancestry Connecting the Eastern Baltic to Uralic Speakers  
855 further East”. In: *Current Biology* 29.10 (May 2019), 1701–1711.e16. DOI: 10.1016/j.cub.2019.04.  
856 026.
- 857 [56] Marc Haber et al. “A Transient Pulse of Genetic Admixture from the Crusaders in the Near East  
858 Identified from Ancient Genome Sequences”. In: *The American Journal of Human Genetics* 104.5  
859 (May 2019), pp. 977–984. DOI: 10.1016/j.ajhg.2019.03.015.
- 860 [57] Margaret L. Antonio et al. “Ancient Rome: A genetic crossroads of Europe and the Mediterranean”.  
861 In: *Science* 366.6466 (Nov. 2019), pp. 708–714. DOI: 10.1126/science.aay6826.
- 862 [58] Mari Järve et al. “Shifts in the Genetic Landscape of the Western Eurasian Steppe Associated with the  
863 Beginning and End of the Scythian Dominance”. In: *Current Biology* 29.14 (July 2019), 2430–2441.e10.  
864 DOI: 10.1016/j.cub.2019.06.019.
- 865 [59] Martin Sikora et al. “The population history of northeastern Siberia since the Pleistocene”. In: *Nature*  
866 570.7760 (June 2019), pp. 182–188. DOI: 10.1038/s41586-019-1279-z.
- 867 [60] Michal Feldman et al. “Ancient DNA sheds light on the genetic origins of early Iron Age Philistines”.  
868 In: *Sci. Adv.* 5.7 (July 2019). DOI: 10.1126/sciadv.aax0061.
- 869 [61] Michal Feldman et al. “Late Pleistocene human genome suggests a local origin for the first farmers of  
870 central Anatolia”. In: *Nat Commun* 10.1 (Mar. 2019). DOI: 10.1038/s41467-019-09209-7.
- 871 [62] Selina Brace et al. “Ancient genomes indicate population replacement in Early Neolithic Britain”. In:  
872 *Nat Ecol Evol* 3.5 (Apr. 2019), pp. 765–771. DOI: 10.1038/s41559-019-0871-9.
- 873 [63] Vagheesh M. Narasimhan et al. “The formation of human populations in South and Central Asia”. In:  
874 *Science* 365.6457 (Sept. 2019). DOI: 10.1126/science.aat7487.
- 875 [64] Vanessa Villalba-Mouco et al. “Survival of Late Pleistocene Hunter-Gatherer Ancestry in the Iberian  
876 Peninsula”. In: *Current Biology* 29.7 (Apr. 2019), 1169–1177.e7. DOI: 10.1016/j.cub.2019.02.006.
- 877 [65] Alexandra Coutinho et al. “The Neolithic Pitted Ware culture foragers were culturally but not ge-  
878 netically influenced by the Battle Axe culture herders”. In: *Am J Phys Anthropol* 172.4 (June 2020),  
879 pp. 638–649. DOI: 10.1002/ajpa.24079.
- 880 [66] Anja Furtwängler et al. “Comparison of target enrichment strategies for ancient pathogen DNA”. In:  
881 *BioTechniques* 69.6 (Dec. 2020), pp. 455–459. DOI: 10.2144/btn-2020-0100.
- 882 [67] Anna Linderholm et al. “Corded Ware cultural complexity uncovered using genomic and isotopic  
883 analysis from south-eastern Poland”. In: *Sci Rep* 10.1 (Apr. 2020). DOI: 10.1038/s41598-020-63138-  
884 w.
- 885 [68] Ashot Margaryan et al. “Population genomics of the Viking world”. In: *Nature* 585.7825 (Sept. 2020),  
886 pp. 390–396. DOI: 10.1038/s41586-020-2688-8.

- 887 [69] Daniel M. Fernandes et al. “The spread of steppe and Iranian-related ancestry in the islands of the  
888 western Mediterranean”. In: *Nat Ecol Evol* 4.3 (Feb. 2020), pp. 334–345. DOI: 10.1038/s41559-020-  
889 1102-0.
- 890 [70] David Gokhman et al. “Differential DNA methylation of vocal and facial anatomy genes in modern  
891 humans”. In: *Nat Commun* 11.1 (Mar. 2020). DOI: 10.1038/s41467-020-15020-6.
- 892 [71] Eirini Skourtanioti et al. “Genomic History of Neolithic to Bronze Age Anatolia, Northern Levant, and  
893 Southern Caucasus”. In: *Cell* 181.5 (May 2020), 1158–1175.e28. DOI: 10.1016/j.cell.2020.04.044.
- 894 [72] Joachim Burger et al. “Low Prevalence of Lactase Persistence in Bronze Age Europe Indicates Ongoing  
895 Strong Selection over the Last 3,000 Years”. In: *Current Biology* 30.21 (Nov. 2020), 4307–4315.e13.  
896 DOI: 10.1016/j.cub.2020.08.033.
- 897 [73] Joseph H. Marcus et al. “Genetic history from the Middle Neolithic to present on the Mediterranean  
898 island of Sardinia”. In: *Nat Commun* 11.1 (Feb. 2020). DOI: 10.1038/s41467-020-14523-6.
- 899 [74] Lara M. Cassidy et al. “A dynastic elite in monumental Neolithic society”. In: *Nature* 582.7812 (June  
900 2020), pp. 384–388. DOI: 10.1038/s41586-020-2378-6.
- 901 [75] Lily Agranat-Tamir et al. “The Genomic History of the Bronze Age Southern Levant”. In: *Cell* 181.5  
902 (May 2020), 1146–1157.e11. DOI: 10.1016/j.cell.2020.04.024.
- 903 [76] Maité Rivollat et al. “Ancient genome-wide DNA from France highlights the complexity of interactions  
904 between Mesolithic hunter-gatherers and Neolithic farmers”. In: *Sci. Adv.* 6.22 (May 2020). DOI: 10.  
905 1126/sciadv.aaz5344.
- 906 [77] Marc Haber et al. “A Genetic History of the Near East from an aDNA Time Course Sampling Eight  
907 Points in the Past 4,000 Years”. In: *The American Journal of Human Genetics* 107.1 (July 2020),  
908 pp. 149–157. DOI: 10.1016/j.ajhg.2020.05.008.
- 909 [78] Samantha Brunel et al. “Ancient genomes from present-day France unveil 7,000 years of its demographic  
910 history”. In: *Proc. Natl. Acad. Sci. U.S.A.* 117.23 (May 2020), pp. 12791–12798. DOI: 10.1073/pnas.  
911 1918034117.
- 912 [79] Éadaoin Harney et al. “A minimally destructive protocol for DNA extraction from ancient teeth”. In:  
913 *Genome Res.* 31.3 (Feb. 2021), pp. 472–483. DOI: 10.1101/gr.267534.120.
- 914 [80] Andaine Seguin-Orlando et al. “Heterogeneous Hunter-Gatherer and Steppe-Related Ancestries in Late  
915 Neolithic and Bell Beaker Genomes from Present-Day France”. In: *Current Biology* 31.5 (Mar. 2021),  
916 1072–1083.e10. DOI: 10.1016/j.cub.2020.12.015.
- 917 [81] Anne Friis-Holm Egefjord et al. “Genomic Steppe ancestry in skeletons from the Neolithic Single Grave  
918 Culture in Denmark”. In: *PLoS ONE* 16.1 (Jan. 2021). Ed. by Peter F. Biehl, e0244872. DOI: 10.  
919 1371/journal.pone.0244872.
- 920 [82] Guido Alberto Gnecci-Ruscione et al. “Ancient genomic time transect from the Central Asian Steppe  
921 unravels the history of the Scythians”. In: *Sci. Adv.* 7.13 (Mar. 2021). DOI: 10.1126/sciadv.abe4414.
- 922 [83] Lehti Saag et al. “Genetic ancestry changes in Stone to Bronze Age transition in the East European  
923 plain”. In: *Sci. Adv.* 7.4 (Jan. 2021). DOI: 10.1126/sciadv.abd6535.
- 924 [84] Luka Papac et al. “Dynamic changes in genomic and social structures in third millennium BCE central  
925 Europe”. In: *Sci. Adv.* 7.35 (Aug. 2021). DOI: 10.1126/sciadv.abi6941.

- 926 [85] Mario Novak et al. “Genome-wide analysis of nearly all the victims of a 6200 year old massacre”. In:  
927 *PLoS ONE* 16.3 (Mar. 2021). Ed. by Peter F. Biehl, e0247332. DOI: 10.1371/journal.pone.0247332.
- 928 [86] Reyhan Yaka et al. “Variable kinship patterns in Neolithic Anatolia revealed by ancient genomes”. In:  
929 *Current Biology* 31.11 (June 2021), 2455–2468.e18. DOI: 10.1016/j.cub.2021.03.050.
